# Supplementary material for: Supramolecular hybrids based on Ru(ii) porphyrin and octahedral Mo(ii) iodide cluster
Source: Royal Society of Chemistry journal article supplement (doi:10.1039/d3dt00251a), 2023-01-01
Supplement: d3dt00251a1.pdf [file d3dt00251a1.pdf]

## Electronic Supporting Information

### Supramolecular Hybrids Based on Ru(II) Porphyrin and Octahedral Mo(II) Iodide Cluster

Marina V. Volostnykh<sup>a\*</sup>, Gayane A. Kirakosyan<sup>a,b</sup>, Anna A. Sinelshchikova<sup>a</sup>, Polina A. Loboda<sup>c</sup>,  
Pavel V. Dorovatovskii<sup>d</sup>, Maxim A. Mikhaylov<sup>e</sup>, Aslan Yu. Tsivadze<sup>a,b</sup>, Maxim N. Sokolov<sup>e\*</sup>  
and Yulia G. Gorbunova<sup>a,b\*</sup>

<sup>a</sup>Frumkin Institute of Physical Chemistry and Electrochemistry, Russian Academy of Sciences,  
Leninsky pr. 31, Bldg. 4, Moscow, 119071, Russia

<sup>b</sup>Kurnakov Institute of General and Inorganic Chemistry, Russian Academy of Sciences,  
Leninsky pr. 31, Moscow, 119991, Russia

<sup>c</sup>Peoples' Friendship University of Russia, Miklukho-Maklaya str.6, Moscow, 117198, Russia

<sup>d</sup>National Research Centre "Kurchatov Institute", Kurchatov Square 1, Moscow, 123182, Russia

<sup>e</sup>Nikolaev Institute of Inorganic Chemistry, Siberian Branch of the Russian Academy of  
Sciences, 3, Acad. Lavrentiev Ave., Novosibirsk, 630090, Russia

E-mail: [marinavolostnykh@gmail.com](mailto:marinavolostnykh@gmail.com)

## Table of contents

|                                                                 |           |
|-----------------------------------------------------------------|-----------|
| <b>1. Ru(II)CO porphyrin building block</b> .....               | <b>3</b>  |
| <b>1.1. Characterization of RuDTolP(CO)H<sub>2</sub>O</b> ..... | <b>3</b>  |
| <b>1.2. Characterization of RuDTolP(CO)Py</b> .....             | <b>5</b>  |
| <b>2. Cluster–Ru(II)Porphyrin complexes</b> .....               | <b>9</b>  |
| <b>2.1. HRMS (ESI) spectra</b> .....                            | <b>9</b>  |
| <b>2.2. UV-Vis spectroscopy</b> .....                           | <b>11</b> |
| <b>2.3. NMR spectroscopy</b> .....                              | <b>12</b> |
| <b>2.3.1. DOSY Experiments</b> .....                            | <b>23</b> |
| <b>2.4. FT-IR spectra</b> .....                                 | <b>26</b> |
| <b>2.5. Single-Crystal X-ray Analysis</b> .....                 | <b>27</b> |
| <b>2.6. Photophysical properties</b> .....                      | <b>55</b> |

# 1. Ru(II)CO porphyrin building block

## 1.1. Characterization of RuDTolP(CO)H<sub>2</sub>O

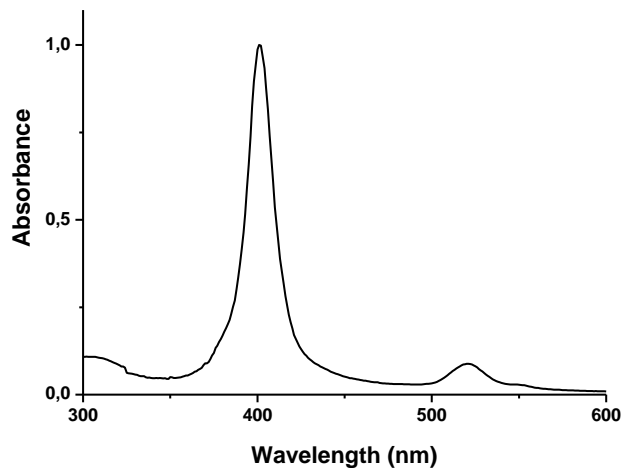

Fig. S1 UV-Vis spectrum of RuDTolP(CO)L (L= H<sub>2</sub>O/solvent) in CHCl<sub>3</sub>.

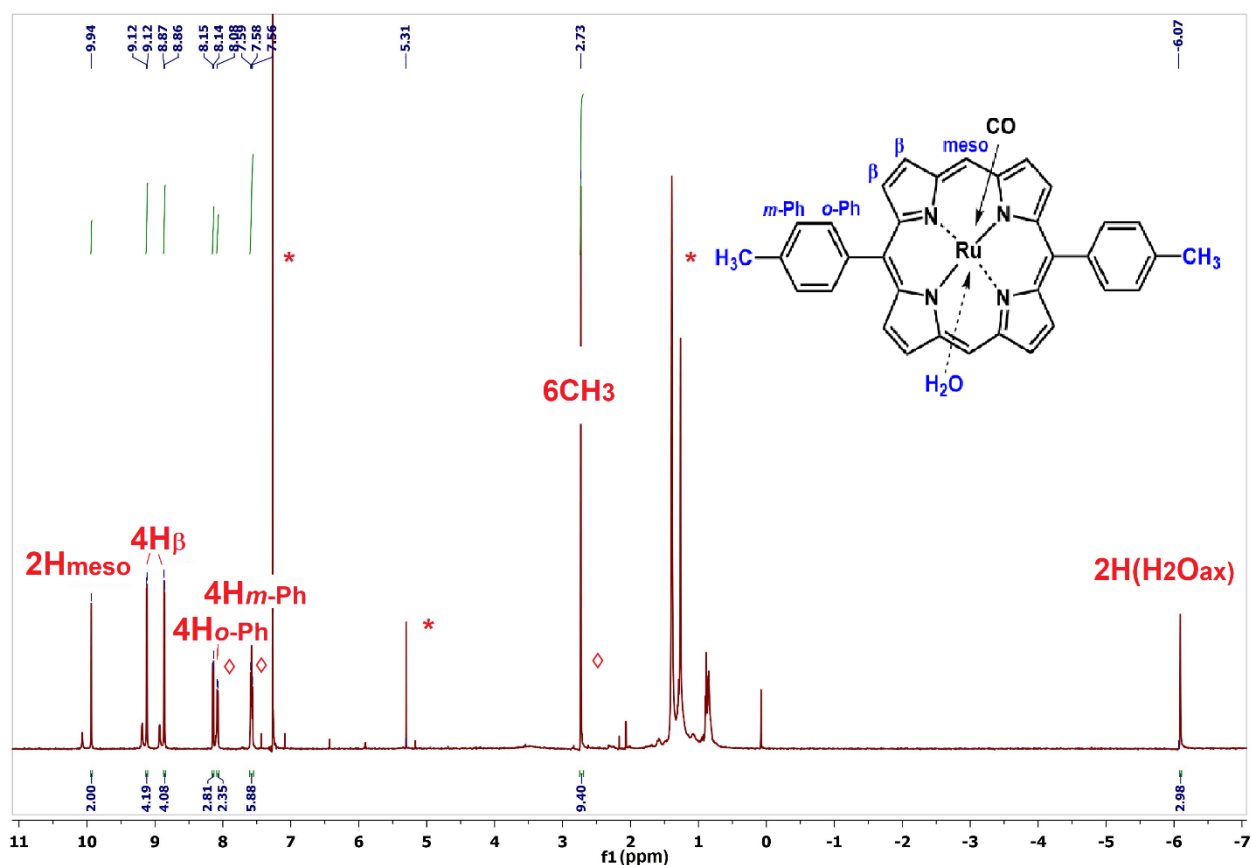

Fig. S2 <sup>1</sup>H NMR spectrum (CDCl<sub>3</sub>, 600 MHz, 303 K) of RuDTolP(CO)H<sub>2</sub>O. Solvent peaks are indicated with \* ( $\delta_{\text{H}}$  7.28 ppm – CHCl<sub>3</sub>,  $\delta_{\text{H}}$  5.30 ppm – CH<sub>2</sub>Cl<sub>2</sub>,  $\delta_{\text{H}}$  1.56 ppm – H<sub>2</sub>O). The indicated with  $\diamond$  integrals are overestimated as these signals are overlapped with those of the second porphyrin RuDTolP(CO)L (L = solvent).

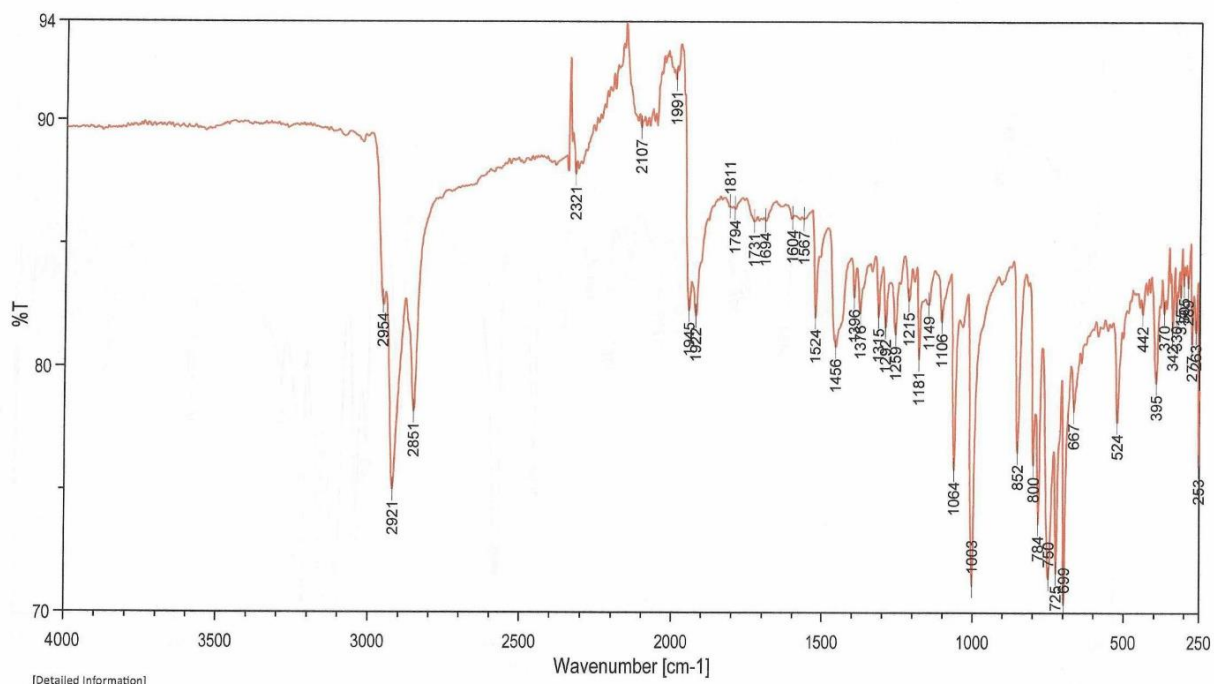

**Fig. S3** FT-IR spectrum of **RuDTolP(CO)L** (L= H<sub>2</sub>O/solvent).

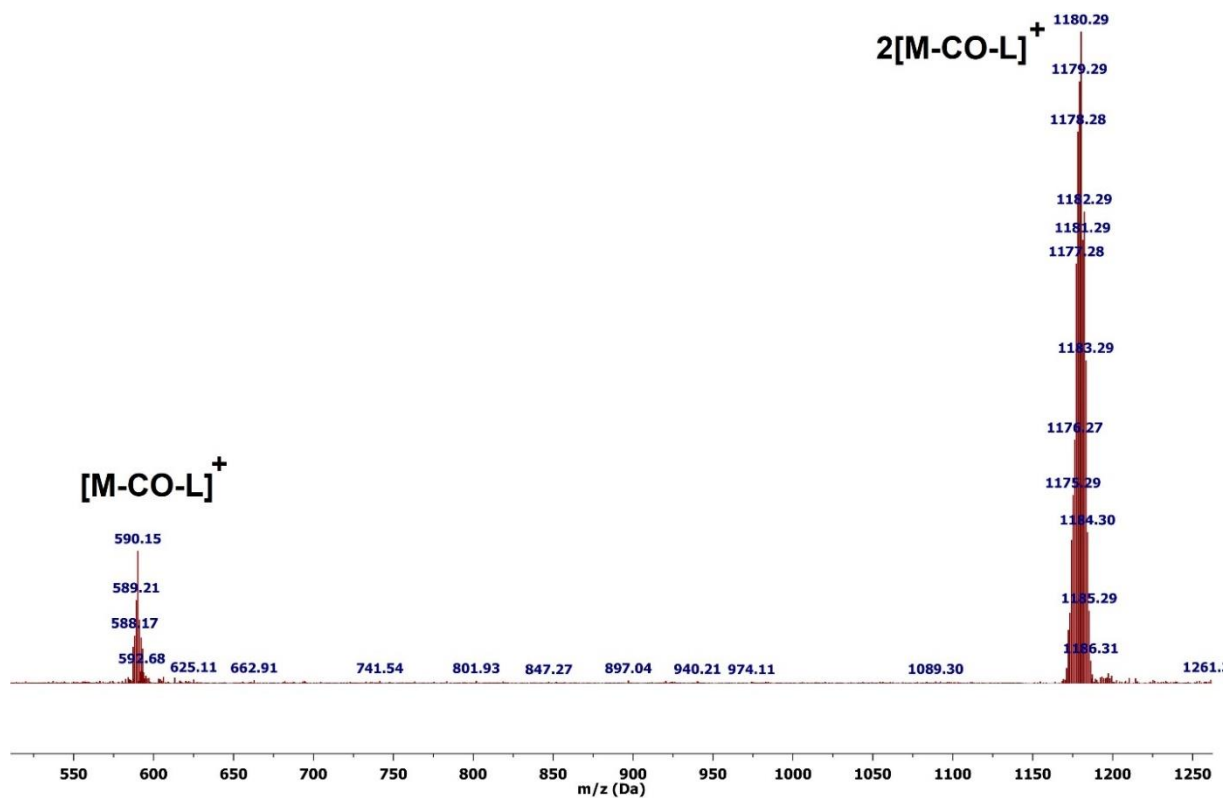

**Fig. S4** MALDI TOF mass spectrum of **RuDTolP(CO)L** (L= H<sub>2</sub>O/solvent).

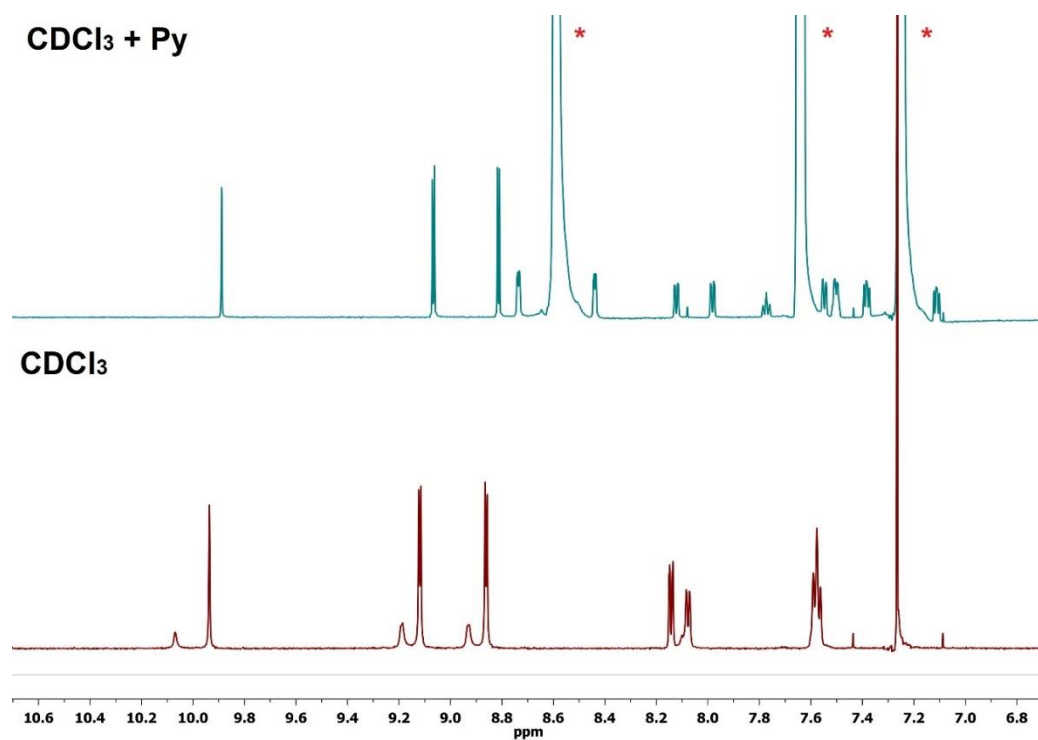

**Fig. S5** <sup>1</sup>H NMR spectra (CDCl<sub>3</sub>, 600 MHz, 303 K) of **RuDTolP(CO)L** (L= H<sub>2</sub>O/solvent) (aromatic range). Solvent peaks are indicated with \* ( $\delta_{\text{H}}$  7.28 ppm – CHCl<sub>3</sub>,  $\delta_{\text{H}}$  8.62, 7.68, 7.29 ppm – pyridine).

### 1.2. Characterization of **RuDTolP(CO)Py**

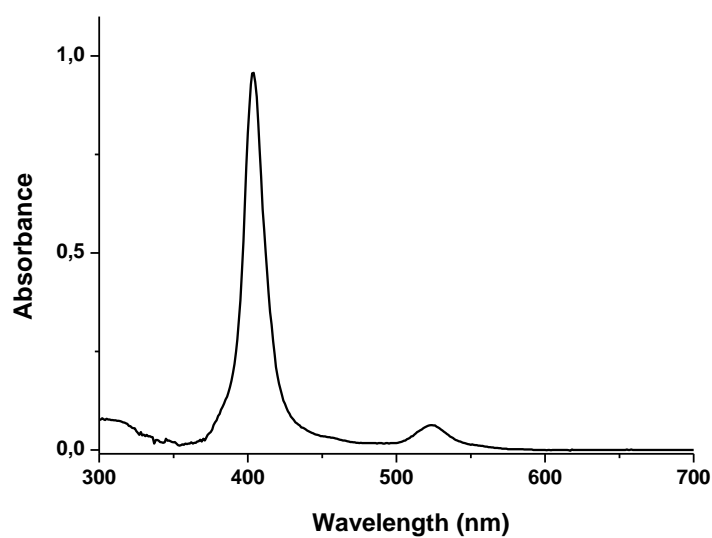

**Fig. S6** UV-Vis spectrum of **RuDTolP(CO)Py** in CHCl<sub>3</sub>.

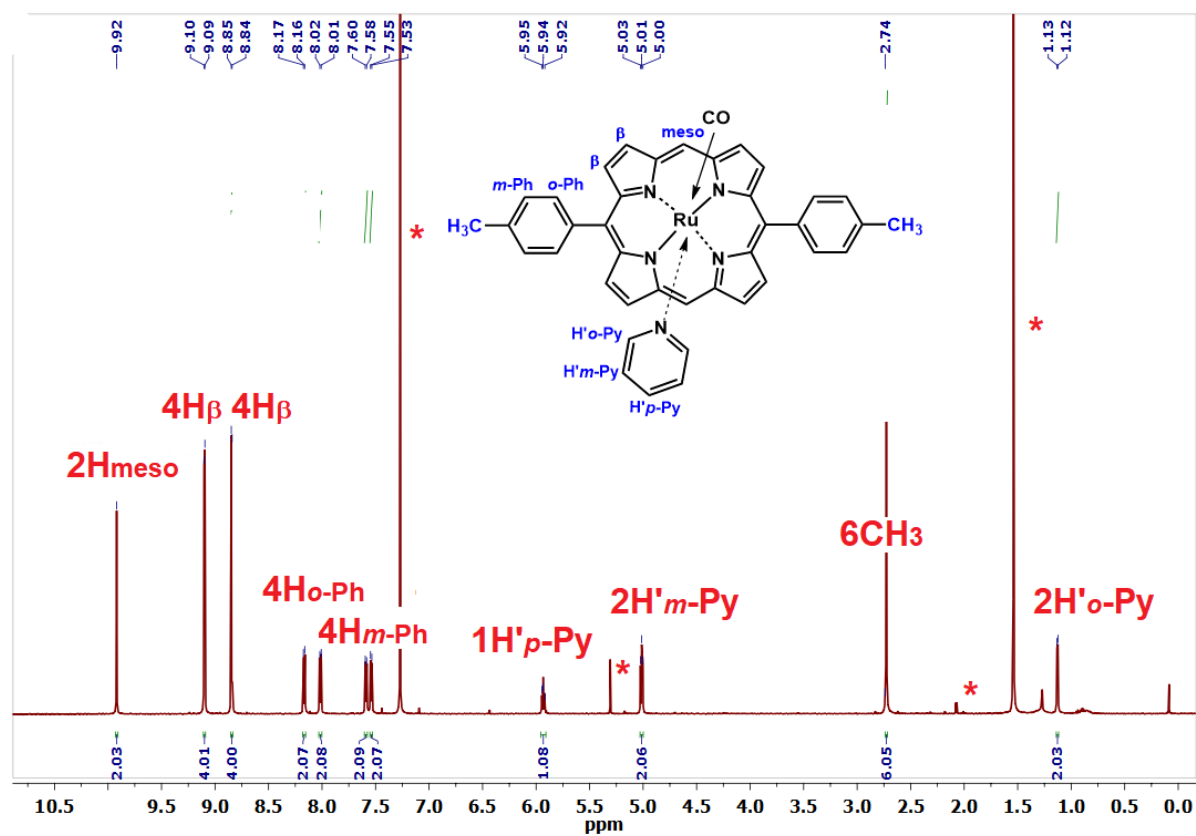

**Fig. S7**  $^1\text{H}$  NMR spectrum ( $\text{CDCl}_3$ , 600 MHz, 303 K) of **RuDTolP(CO)Py**. Solvent peaks are indicated with \* ( $\delta_{\text{H}}$  7.28 ppm –  $\text{CHCl}_3$ ,  $\delta_{\text{H}}$  5.30 ppm –  $\text{CH}_2\text{Cl}_2$ ,  $\delta_{\text{H}}$  1.56 ppm –  $\text{H}_2\text{O}$ ).

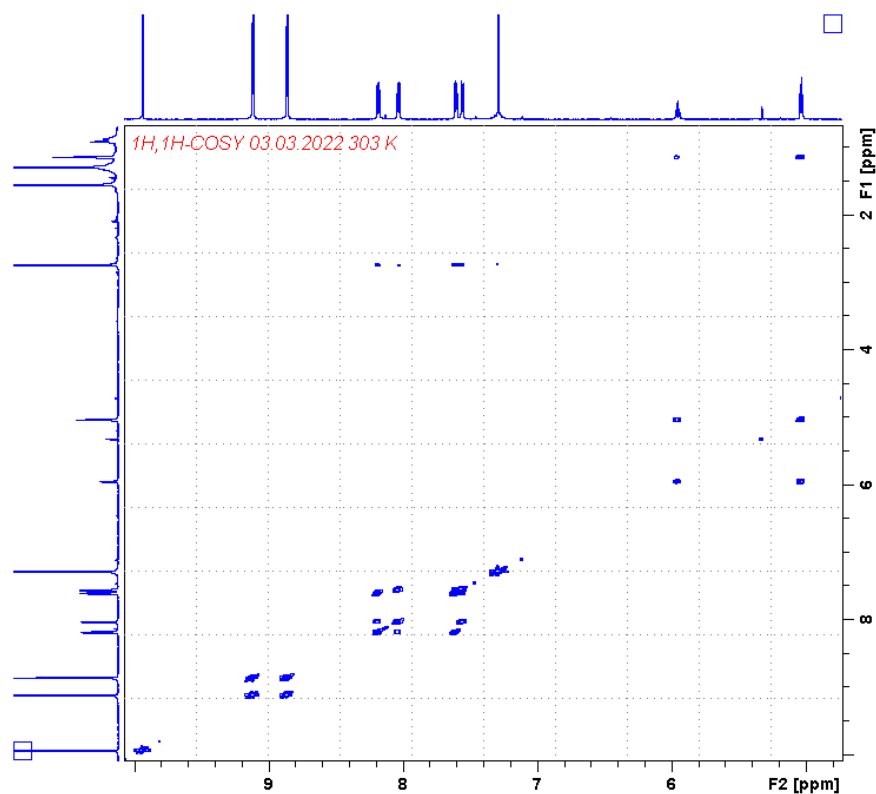

**Fig. S8**  $^1\text{H}$ - $^1\text{H}$  COSY NMR spectrum ( $\text{CDCl}_3$ , 600 MHz, 303 K) of **RuDTolP(CO)Py**.

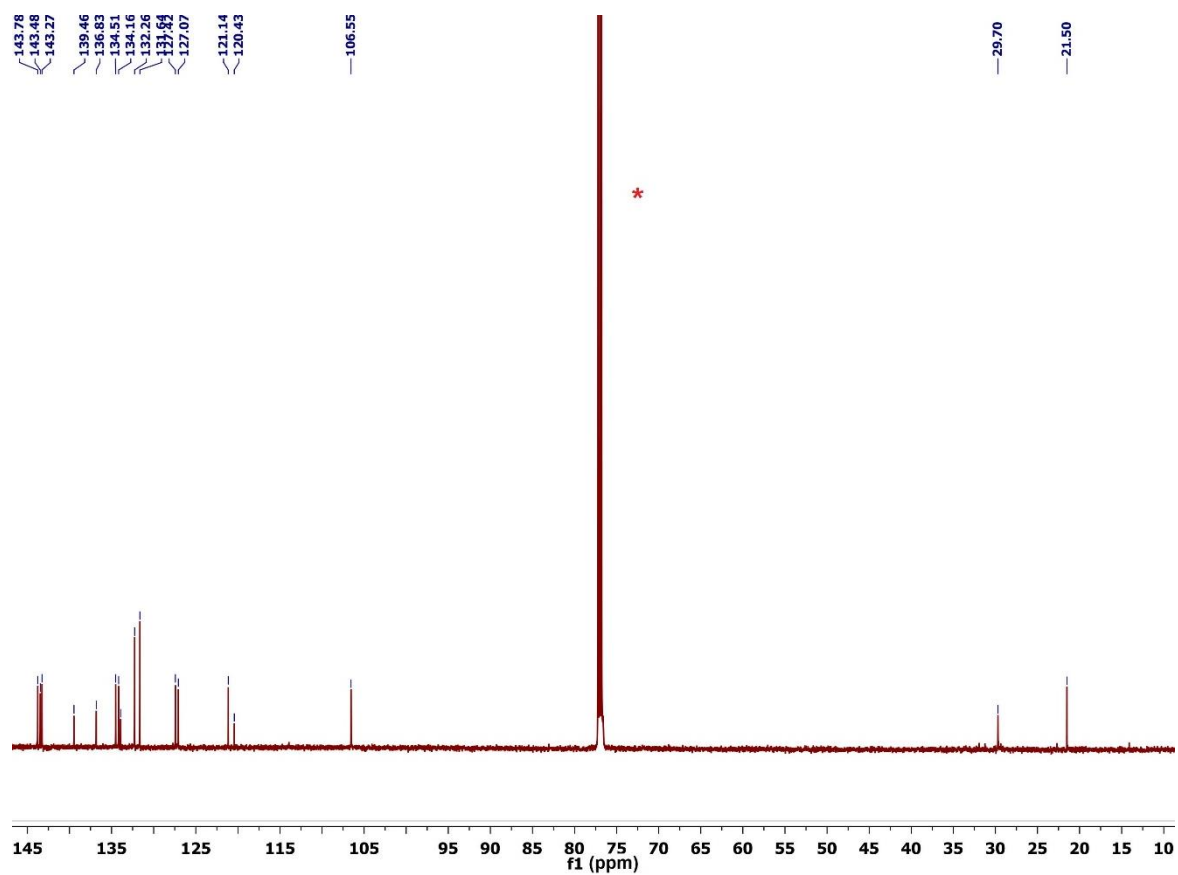

**Fig. S9**  $^{13}\text{C}$  NMR spectrum ( $\text{CDCl}_3$ , 600 MHz, 303 K) of **RuDTolP(CO)Py**. Solvent peak is indicated with \* ( $\delta_c$  77.21 ppm –  $\text{CHCl}_3$ ).

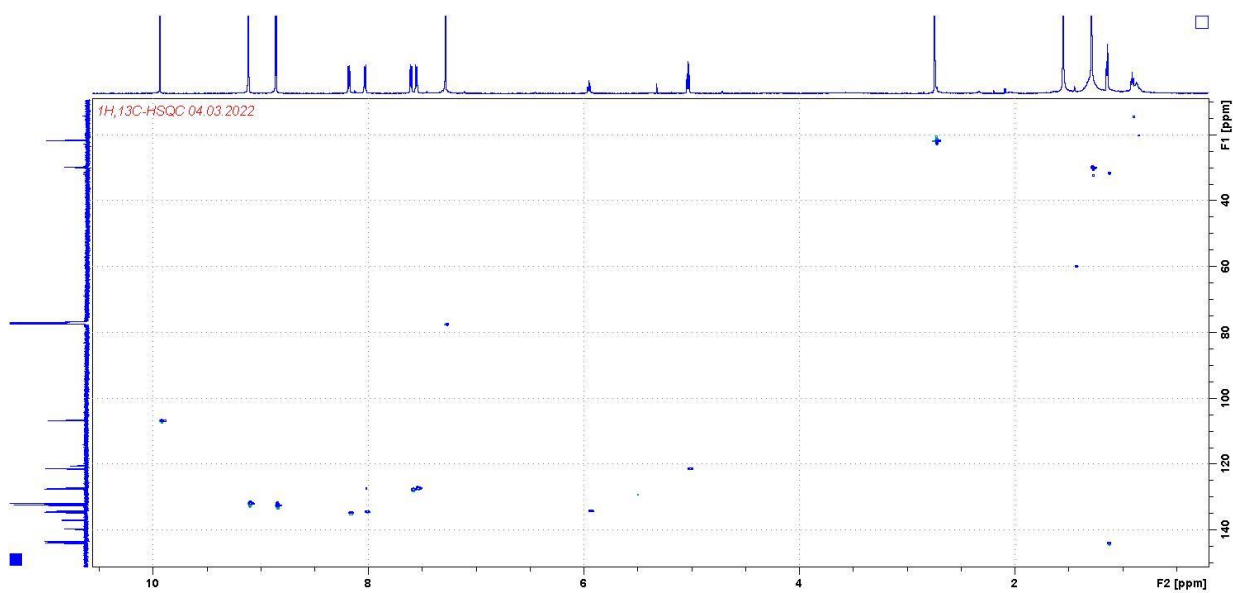

**Fig. S10**  $^1\text{H}$ - $^{13}\text{C}$  HSQC spectrum ( $\text{CDCl}_3$ , 600 MHz, 303 K) of **RuDTolP(CO)Py**.

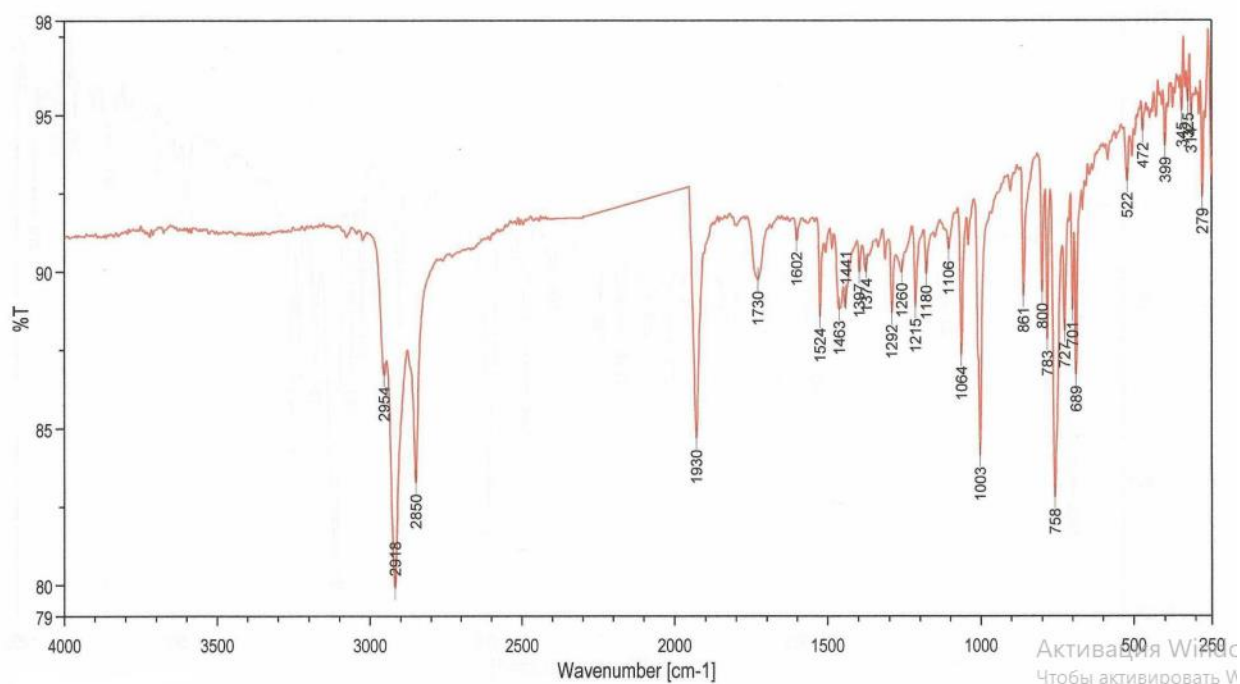

Fig. S11 FT-IR spectrum of RuDTolP(CO)Py.

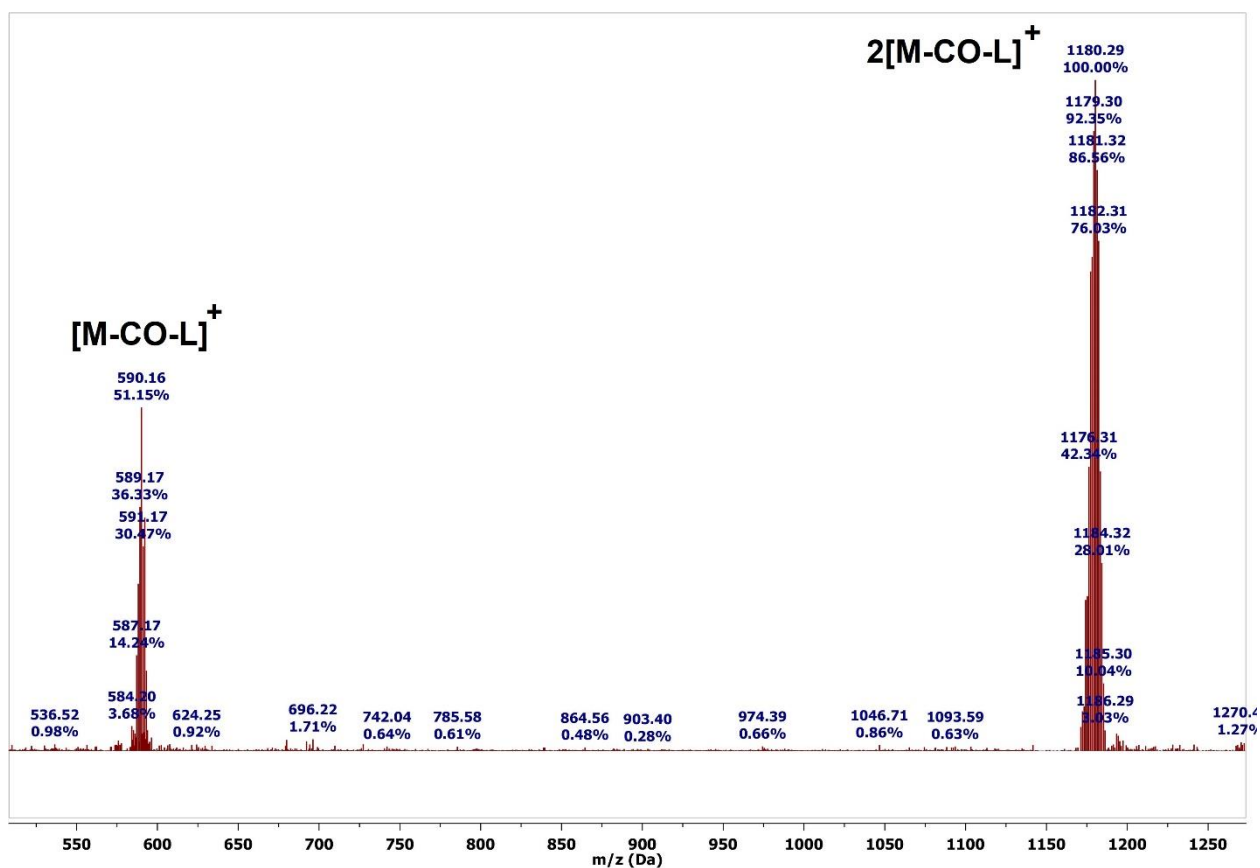

Fig. S12 MALDI TOF mass spectrum of RuDTolP(CO)Py.



## 2. Cluster–Ru(II)Porphyrin complexes

### 2.1. HRMS (ESI) spectra

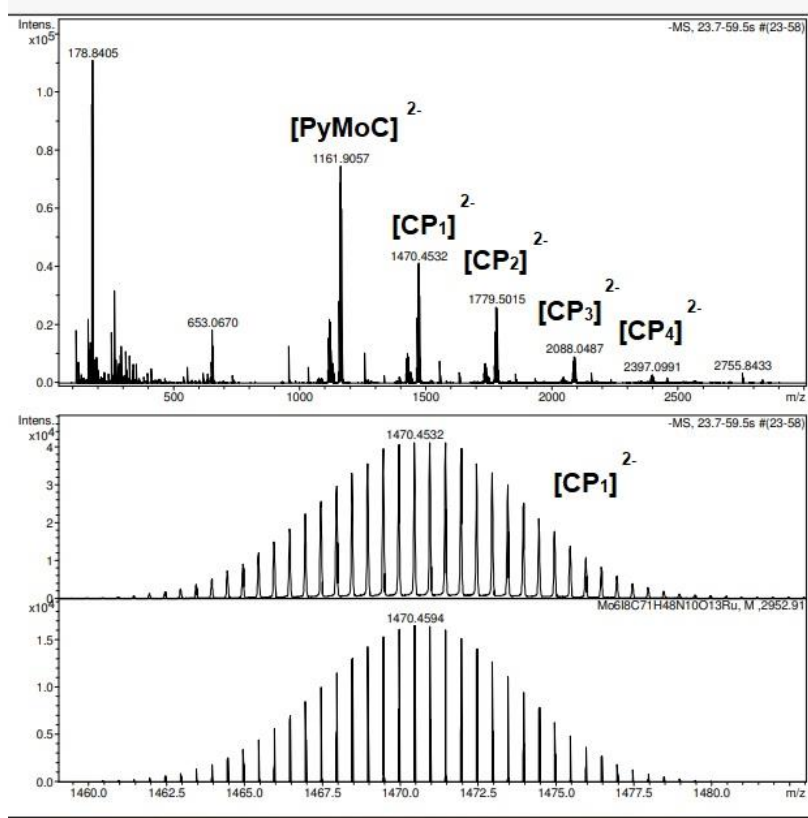

**Fig. S13** HRMS (ESI) spectrum of cluster—porphyrin mixture with C:P molar ratio equal to 1:1 in CHCl<sub>3</sub>.

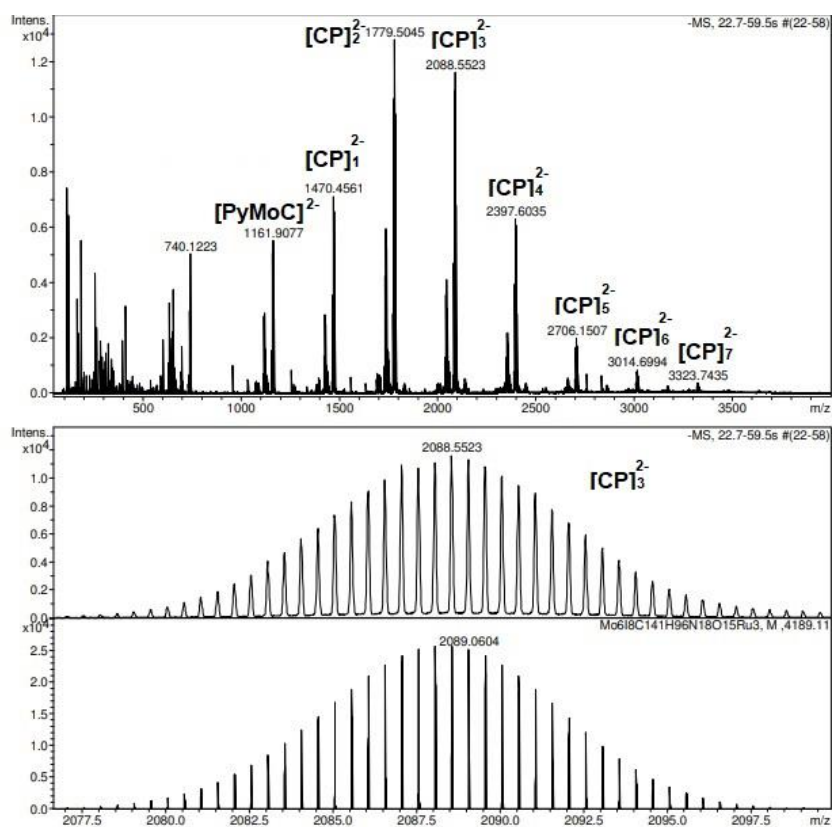

**Fig. S14** HRMS (ESI) spectrum of cluster—porphyrin mixture with C:P molar ratio equal to 1:3 in  $\text{CHCl}_3$ .

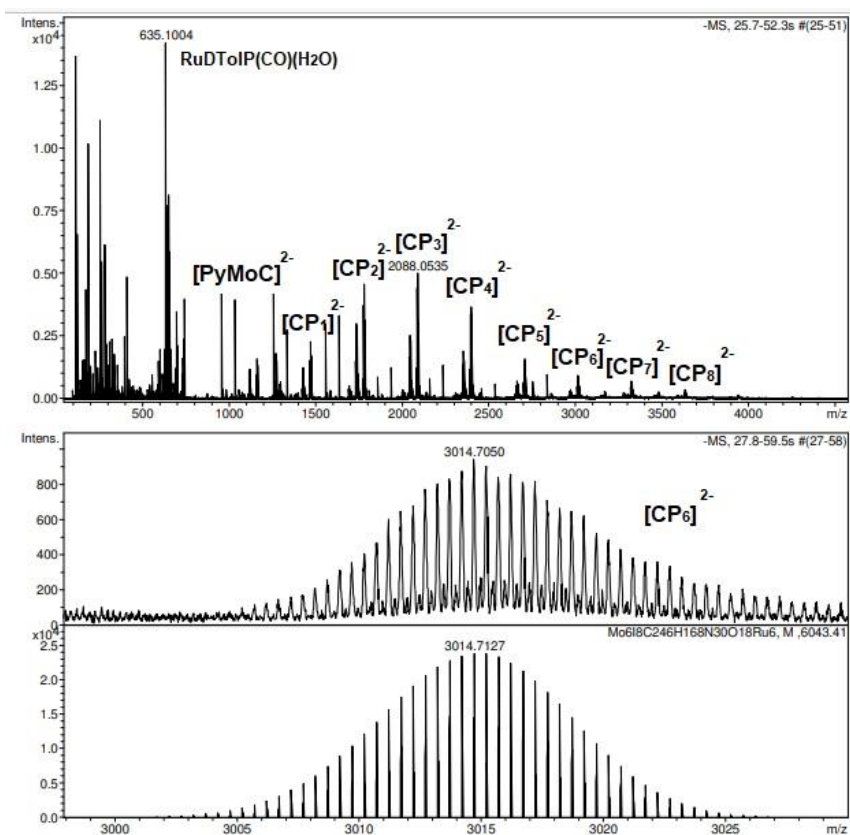

**Fig. S15** HRMS (ESI) spectrum of cluster—porphyrin mixture with C:P molar ratio equal to 1:6 in  $\text{CHCl}_3$ .

## 2.2. UV-Vis spectroscopy

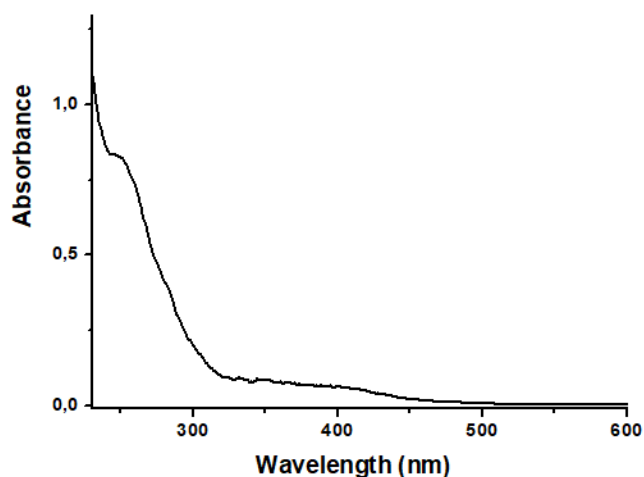

**Fig. S16** UV-Vis spectrum of **PyMoC** in  $\text{CH}_2\text{Cl}_2$ .

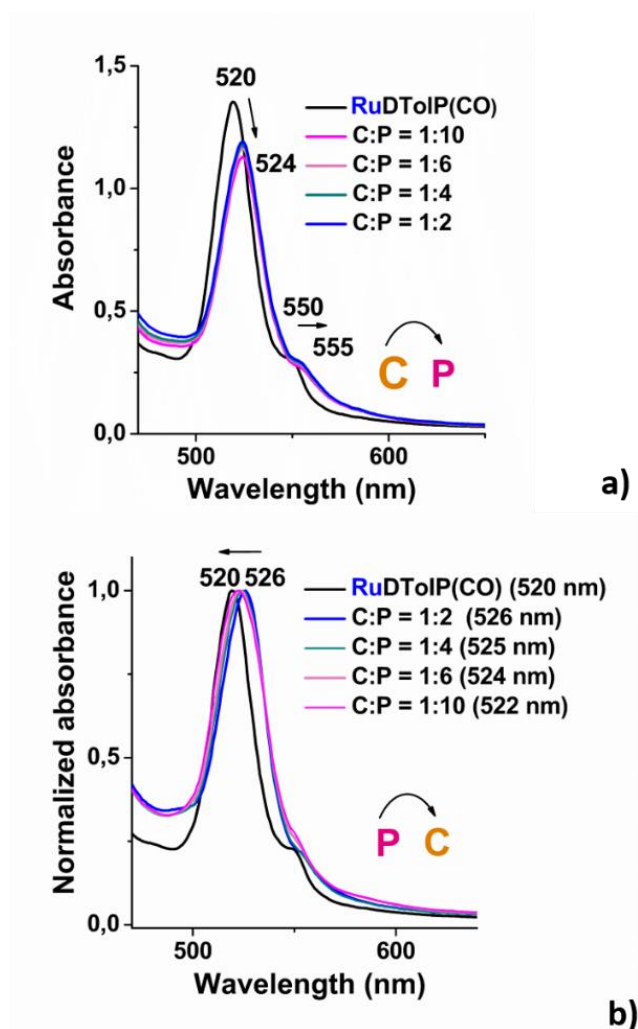

**Fig. S 17** UV-Vis spectral changes at 298 K observed upon stepwise addition of the **PyMoC** ( $4.6 \times 10^{-4}$  M) solution to **RuDTolP(CO)H<sub>2</sub>O** ( $10^{-4}$  M) solution in  $\text{CH}_2\text{Cl}_2$  to achieve the cluster amount 0.10, 0.17, 0.25 and 0.50 equiv. relative to the amount of porphyrin, which corresponds to the C:P molar ratio equal to 1:10, 1:6, 1:4, 1:2 (a); reverse stepwise addition of the **RuDTolP(CO)H<sub>2</sub>O** ( $5 \times 10^{-3}$  M) solution to **PyMoC** ( $2.05 \times 10^{-5}$  M) solution in  $\text{CH}_2\text{Cl}_2$  (b).

### 2.3. NMR spectroscopy

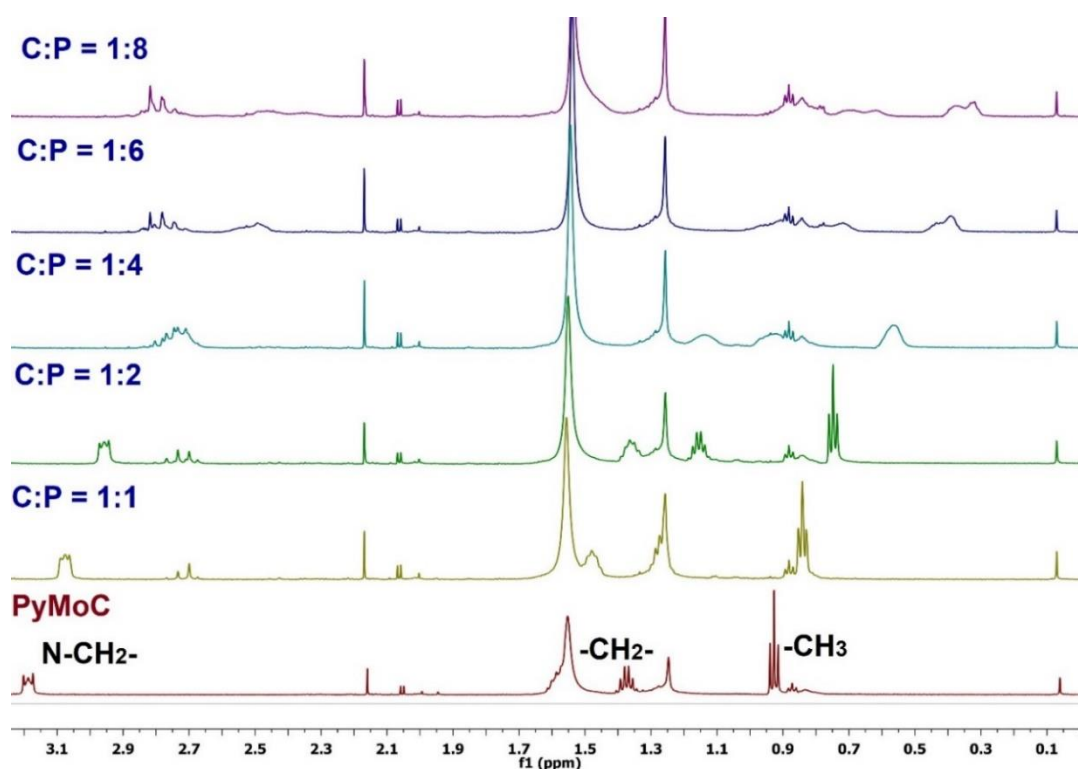

**Fig. S18** <sup>1</sup>H NMR spectra (CDCl<sub>3</sub>, 600 MHz, 303 K, aliphatic region) of **PyMoC** (5 × 10<sup>-4</sup> M) upon titration with **RuDTolP(CO)H<sub>2</sub>O** (4 × 10<sup>-3</sup> M).

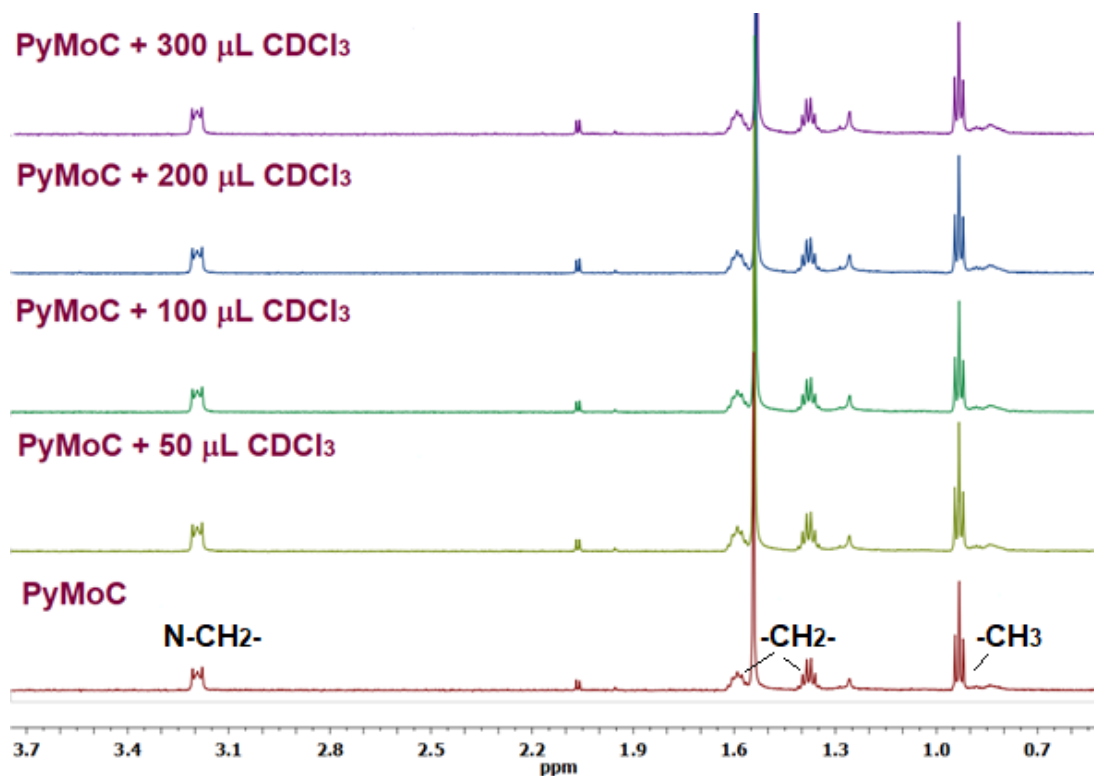

**Fig. S19** <sup>1</sup>H NMR spectra (CDCl<sub>3</sub>, 600 MHz, 303 K, aliphatic region) of **PyMoC** (5 × 10<sup>-4</sup> M) upon dilution with CDCl<sub>3</sub>. The volumes of the added solvent are the same as those used for the above-mentioned titration (Fig. S18).

Downfield shifts of the signals from  $\text{Bu}_4\text{N}^+$  during titration were observed (Fig. S18, S19). This can be attributed to the effect of the ring currents of the porphyrin macrocycle and proves that the  $\text{Bu}_4\text{N}^+$  cations in a nonpolar  $\text{CDCl}_3$  solution are arranged near the periphery of **RuDTolP(CO)** molecules. A similar conclusion about the association between the cationic and anionic components in  $\text{CDCl}_3$  is reached from DOSY experiments (see below). The same effect was detected for the zinc analogue and discussed in detail in our previous paper<sup>1</sup>.

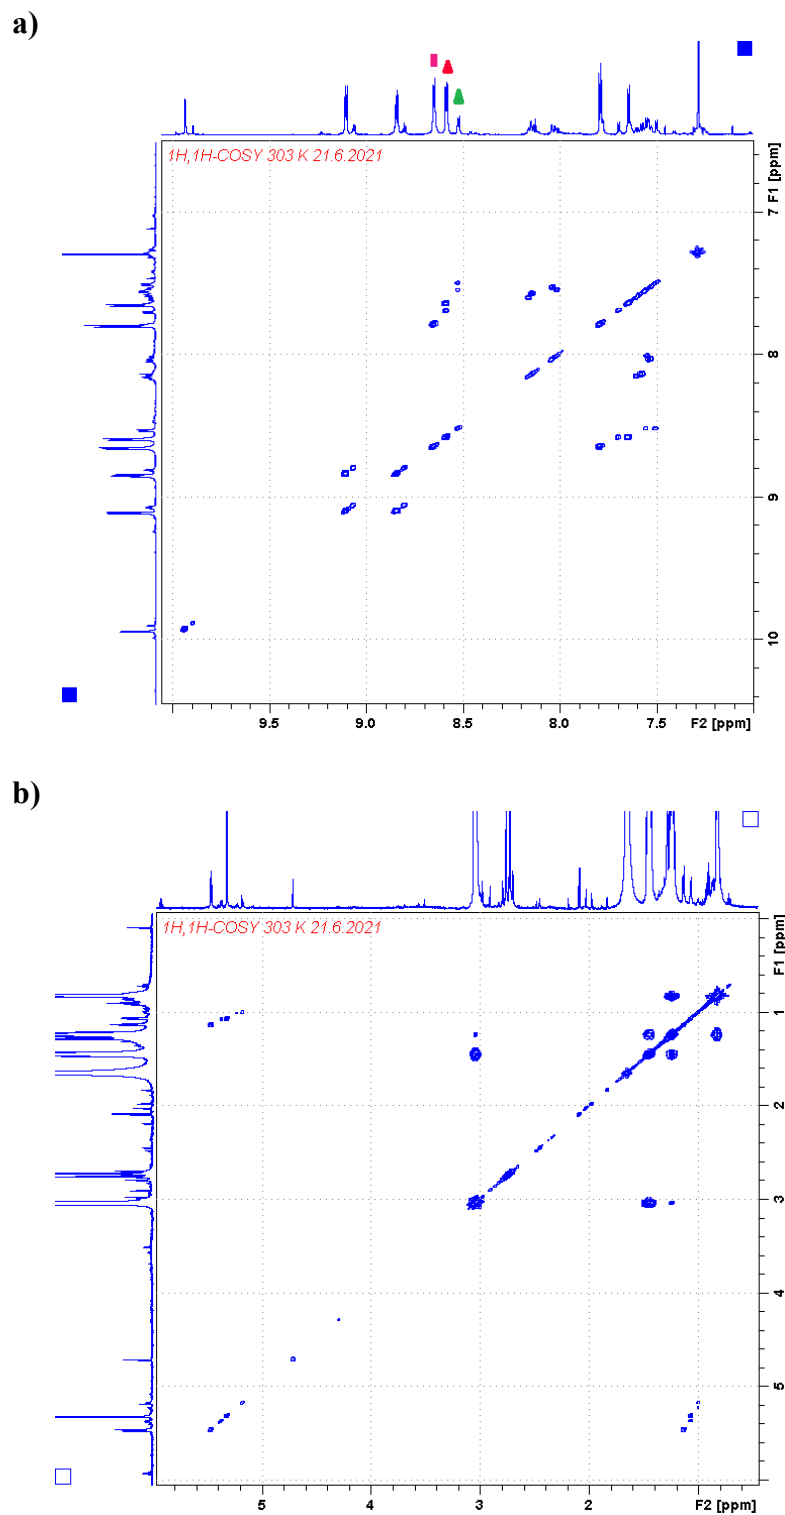

**Fig. S20**  $^1\text{H}$ - $^1\text{H}$  COSY NMR spectrum ( $\text{CDCl}_3$ , 600 MHz, 303 K) of cluster—porphyrin mixture (C:P = 1:1): aromatic region (a) labeling of  $\text{H}_a$  protons, used hereinafter for the assignment of NMR spectra of cluster and supramolecular assemblies according to Table S1, aliphatic region (b).

The  $^1\text{H}$  NMR spectra of the equimolar composition contain two sets of signals from porphyrins,  $\text{H}_{\text{Py}}$  signals from uncoordinated cluster groups ( $\text{H}_o$  8.3—8.7 ppm,  $\text{H}_m$  7.3—7.8 ppm) and new upfield shifted signals in the ranges 5.0—5.6 and 1.0—1.2 ppm, which can be attributed to the  $\text{H}_{\text{Py}}$  of coordinated moieties because they lie within the shielding cone of the Ru(II) porphyrin ring<sup>2</sup>. All the signals, including partially overlapped  $\text{H}_{\text{Py}}$  and  $\text{H}_{\text{Ph}}$  signals in the range 7.3—7.8 ppm and signals in the range 1.0—1.2 ppm masked by  $\text{Bu}_4\text{N}^+$  signals, have been completely assigned from  $^1\text{H}$ - $^1\text{H}$  COSY spectra (Fig. S20). The protons of the coordinated pyridyl moieties are considerably shielded because of the ring current over the porphyrin macrocycle:  $\Delta\delta = -7.83$  ppm for the  $\text{H}'_o$  protons adjacent to the bound nitrogen atom of the cluster pyridyl moiety and  $\Delta\delta = -3.02$  ppm for  $\text{H}'_m$  protons, which are more distant from the porphyrin core. The observed upfield shift is comparable to that in other axially bound pyridyl ligands<sup>3-5</sup>. A careful analysis of proton resonances from coordinated and uncoordinated pyridyl units demonstrates that at the cluster—porphyrin molar ratio 1:1 four species are present in  $\text{CDCl}_3$  solution. One of them is unreacted **PyMoC** cluster and the other three are hybrid **CP<sub>n</sub>** complexes with increasing number of coordinated porphyrin molecules (Fig. S20).

It should be noted that the coordination of Ru(II) porphyrin leads to the loss of equivalence of the pyridyl protons, which is observed as the appearance of additional signals (their number exceeds the number of possible **CP<sub>n</sub>** species) for both bound and free Py moieties, especially for the *meta* protons (Fig. S20, S26 and S27). This observation can be rationalized assuming that the effect of the “trans” partner on a given Py moiety in the cluster is responsible for changes in the shielding of the Py protons. In **CP<sub>n</sub>** assemblies, three types of trans Py...Mo<sub>6</sub>I<sub>8</sub>...Py ordinates are possible: two unbound Py moieties Py...Mo<sub>6</sub>I<sub>8</sub>...Py, bound and unbound trans-partners Ru-Py...Mo<sub>6</sub>I<sub>8</sub>...Py, and two bound trans-partners Ru-Py...Mo<sub>6</sub>I<sub>8</sub>...Py-Ru. Thus, two separate signals from unbound Py protons and two separate signals from bound Py protons can be observed for each **CP<sub>n</sub>** hybrid. The relative intensities of these signals are consistent with the number of coordinates of a definite type, including the existence of geometrical isomers (see Table S1). For example, the **CP<sub>1</sub>** complex contains two types of uncoordinated Py moieties: four of them are located at two Py...Mo<sub>6</sub>I<sub>8</sub>...Py trans-ordinates, and one group is located trans to the bound Py moiety. These groups give rise to the signals of *meta*-protons at 7.65 and 7.71 ppm, respectively, with the relative intensities 1:4. The **CP<sub>2</sub>** complex exists as two geometrical isomers, *trans*-**CP<sub>2</sub>** and *cis*-**CP<sub>2</sub>**, in the 1 : 4 ratio. In the *trans*-isomer, there are four equivalent unbound Py moieties; in the *cis*-isomer, there is one trans-ordinate containing two similar moieties. This gives  $1 \times 4 + 4 \times 2 = 12$  unbound moieties of one type. In addition, the *cis*-isomer also contains two unbound Py moieties located at the mixed trans-ordinates:  $4 \times 2 = 8$ . Both types of moieties are responsible for the signals of *meta* protons at 7.50 and 7.56 ppm, respectively, and the relative intensities of these signals should be 4 : 3, which is consistent with the experimental data. The **CP<sub>2</sub>** isomers also contain coordinated Py moieties: two of them at the Ru-Py...Mo<sub>6</sub>I<sub>8</sub>...Py-Ru ordinate in the *trans*-isomer ( $1 \times 2 = 2$ ) and two moieties are at the mixed ordinates in the *cis*-isomer ( $4 \times 2 = 8$ ). This gives the relative intensities of the corresponding signals (5.52 and 5.46 ppm) 1 : 4 which is consistent with the observed intensities. Results of analogous calculations for all complexes are presented in Table S1.

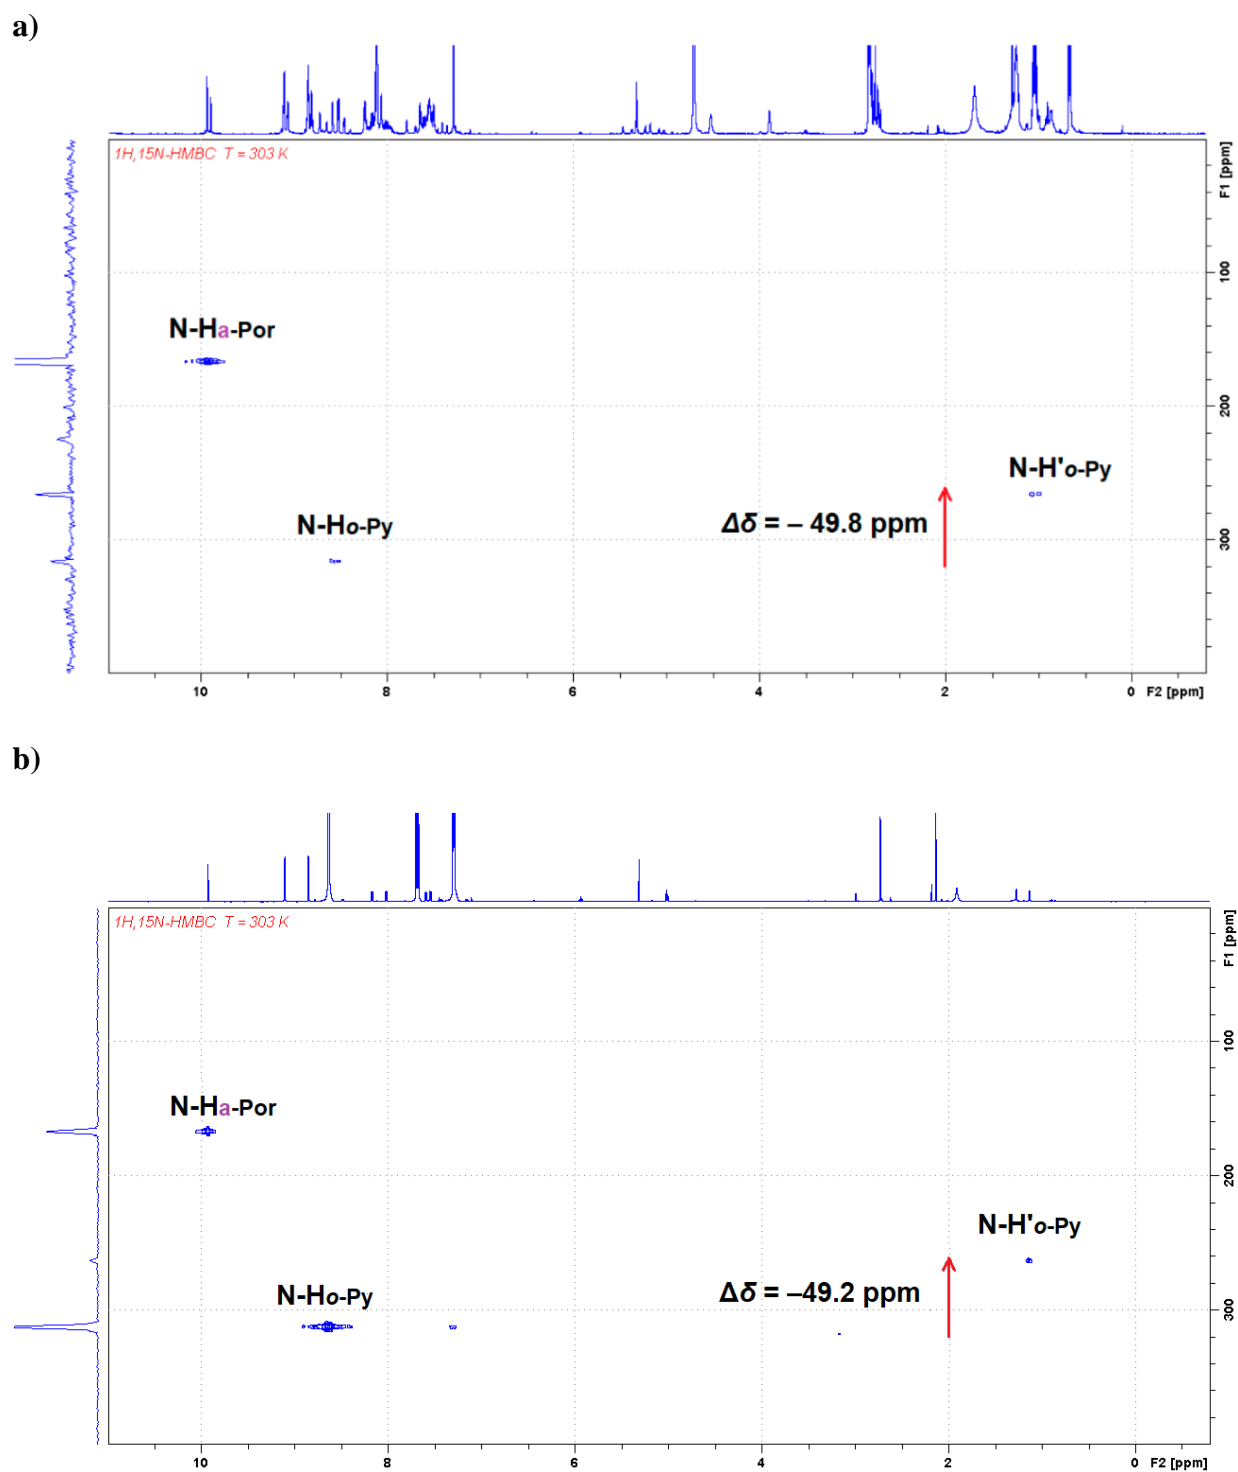

**Fig. S21**  ${}^1\text{H}\text{-}^{15}\text{N}$  HMBC NMR spectra ( $\text{CDCl}_3$ , 600 MHz, 303 K) of cluster:porphyrin mixture with C:P molar ratio equal to 1:2 (a); of **RuDTolP(CO)Py** in the presence of Py excess (b); assignment of the protons according to Fig. 4 in main text.

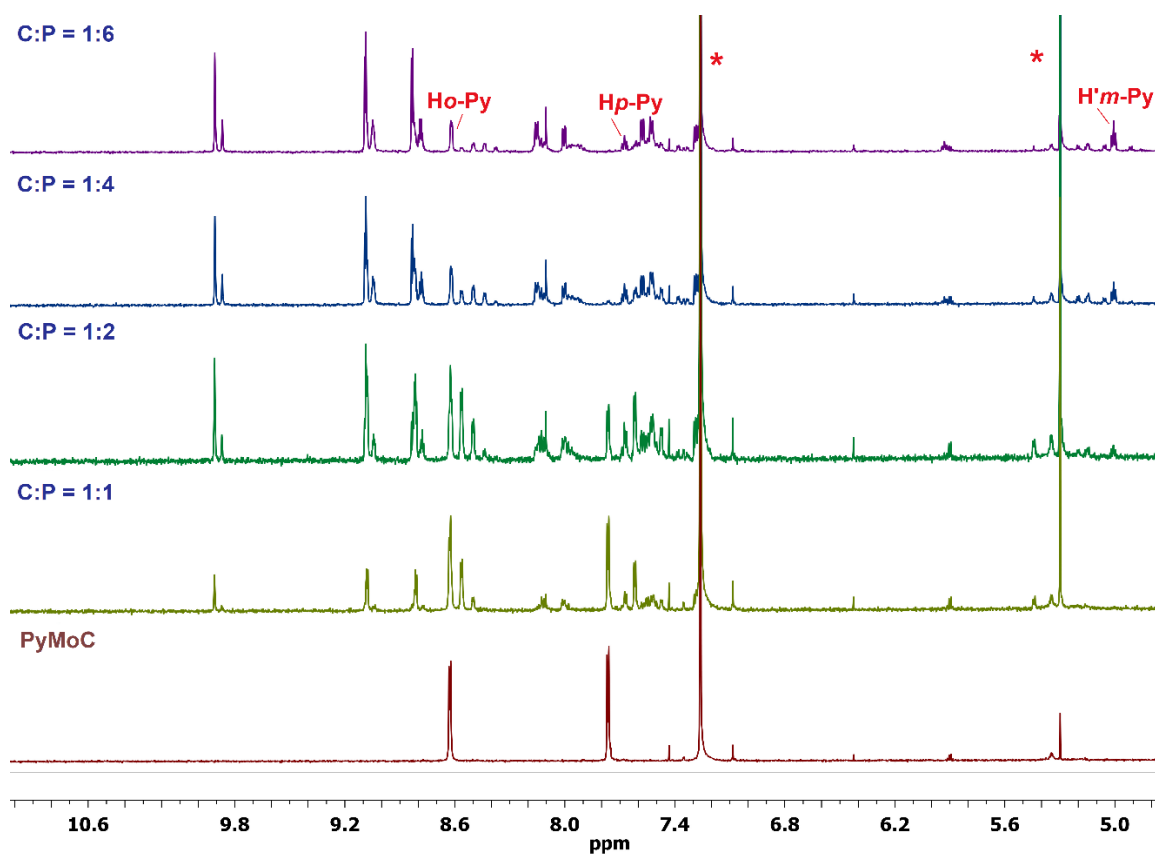

**Fig. S22**  $^1\text{H}$  NMR spectra ( $\text{CDCl}_3$ , 600 MHz, 303 K, aromatic region) of **PyMoC** ( $5 \times 10^{-4}$  M) upon titration with **RuDTolP(CO)Py** ( $8 \times 10^{-3}$  M); assignment of the protons according to Fig. S7. Solvent peaks are indicated with \* ( $\delta_{\text{H}} 7.28$  ppm –  $\text{CHCl}_3$ ,  $\delta_{\text{H}} 5.30$  ppm-  $\text{CH}_2\text{Cl}_2$ ).

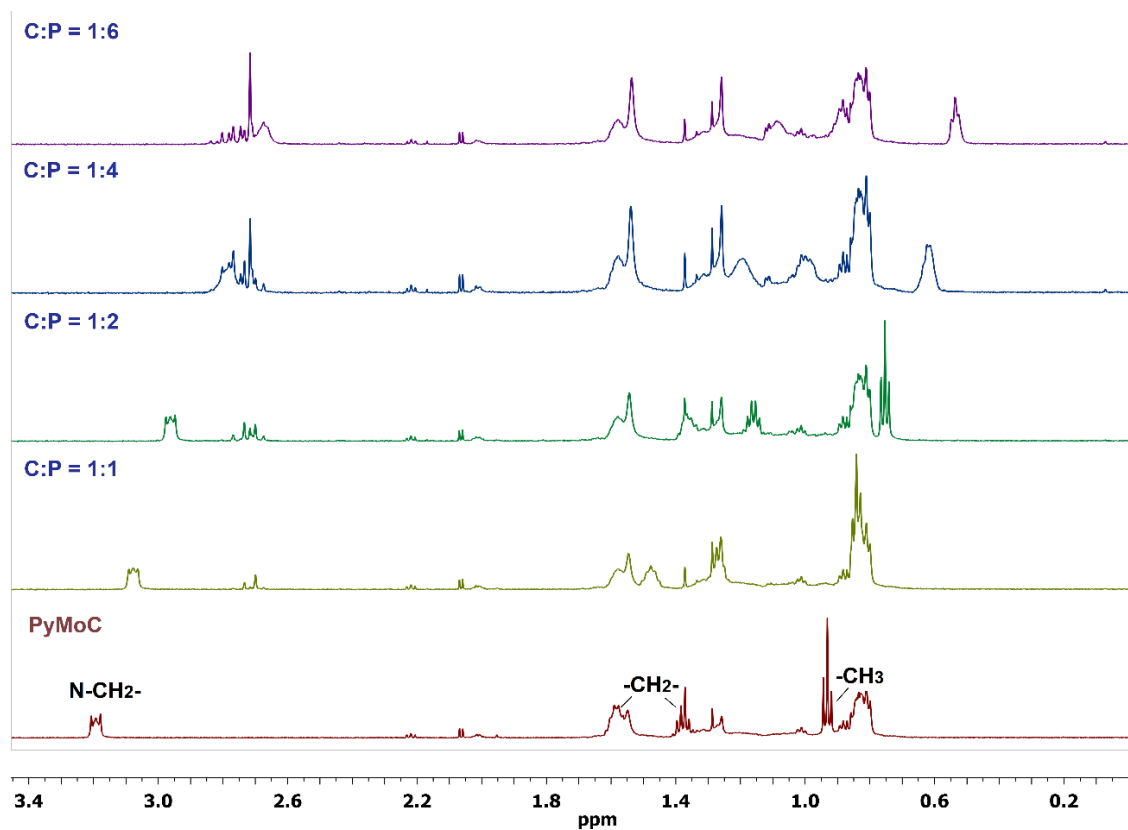

**Fig. S23**  $^1\text{H}$  NMR spectra ( $\text{CDCl}_3$ , 600 MHz, 303 K, aliphatic region) of **PyMoC** ( $5 \times 10^{-4}$  M) upon titration with **RuDTolP(CO)Py** ( $8 \times 10^{-3}$  M).



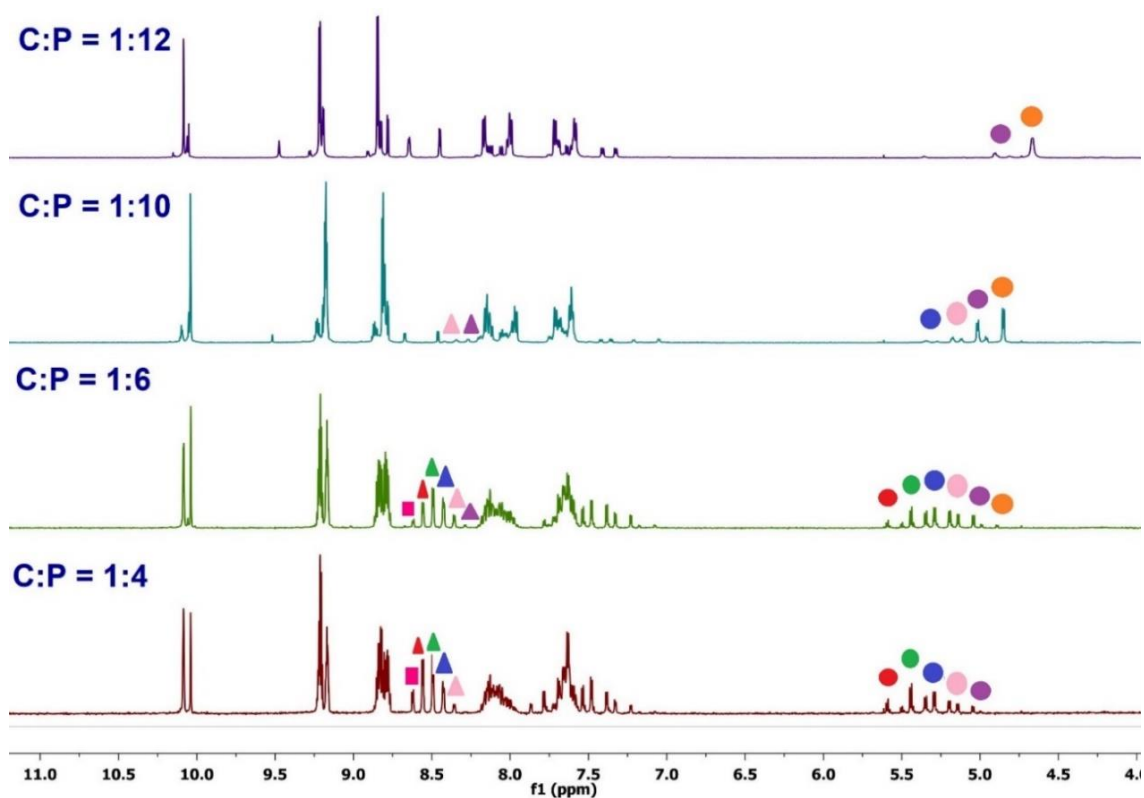

**Fig. S24** Changes in  $^1\text{H}$  NMR spectra (acetone- $d_6$ , 600 MHz, 303 K) of cluster–porphyrin mixtures with different molar C:P ratios, aromatic region; labeling of  $\text{H}_o$  and  $\text{H}'_m$  protons, used hereinafter for the assignment of NMR spectra of cluster and supramolecular assemblies according to Table S1.

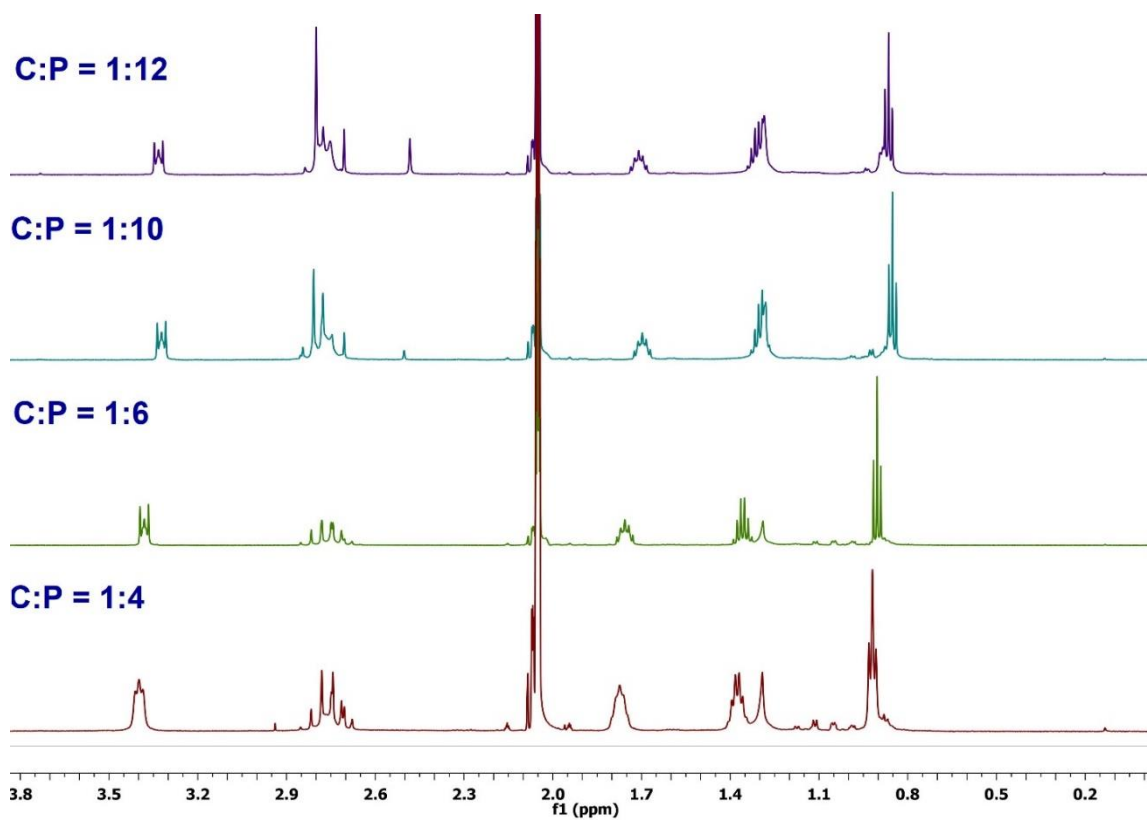

**Fig. S25** Changes in  $^1\text{H}$  NMR spectra (acetone- $d_6$ , 600 MHz, 303 K) of cluster–porphyrin mixtures with different molar C:P ratios, aliphatic region.

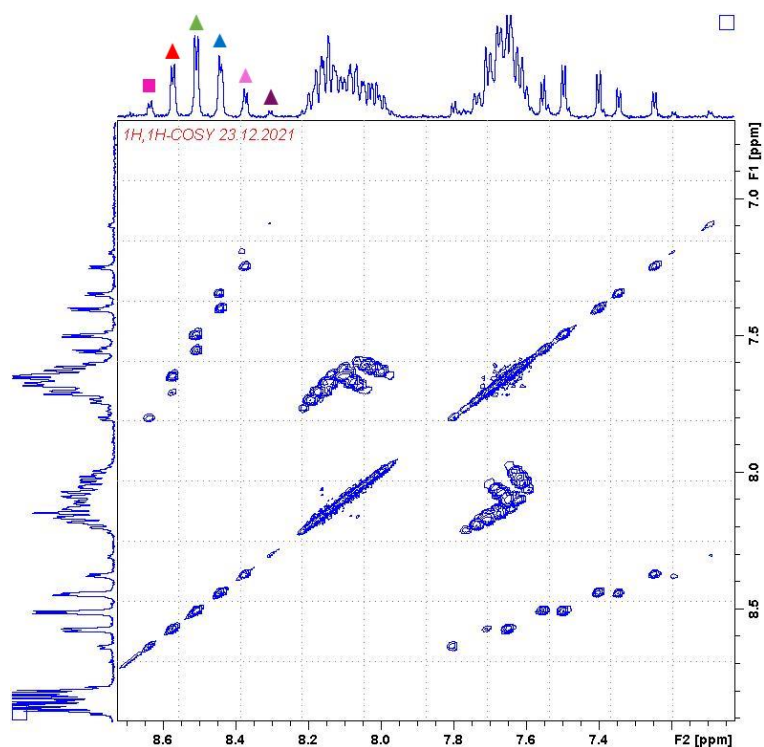

**Fig. S26**  $^1\text{H}$ - $^1\text{H}$  COSY spectrum (acetone- $d_6$ , 600 MHz, 303 K) of **PyMoC** + 6 equiv. **RuDTolP(CO) $\text{H}_2\text{O}$**  after heating at 45 °C for 2 h, aromatic region; labeling of **H<sub>o</sub>** protons, used hereinafter for the assignment of NMR spectra of cluster and supramolecular assemblies according to Table S1.

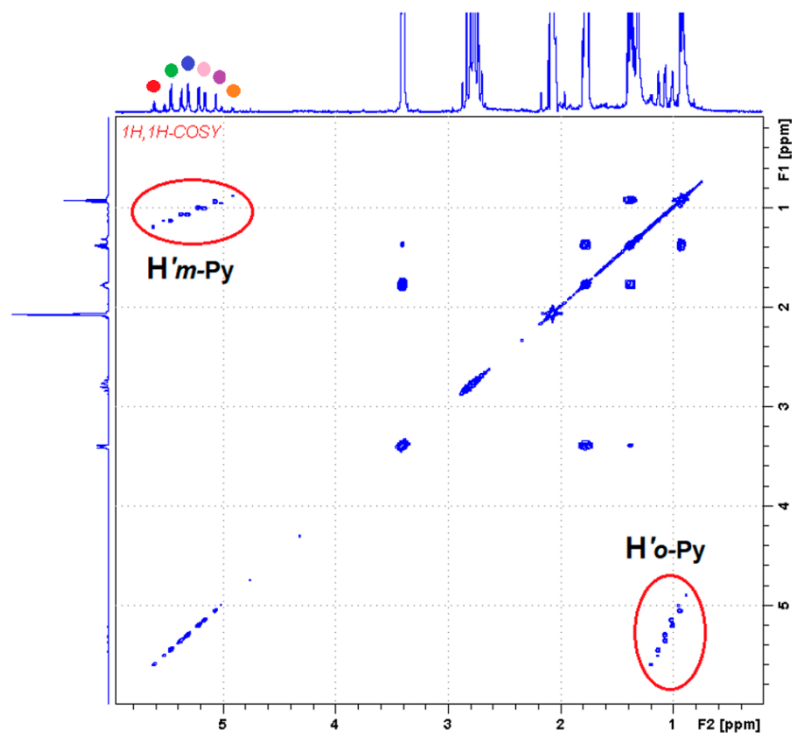

**Fig. S27**  $^1\text{H}$ - $^1\text{H}$  COSY NMR spectrum (acetone- $d_6$ , 600 MHz, 303 K) of **PyMoC** + 6 equiv. **RuDTolP(CO) $\text{H}_2\text{O}$**  after heating at 45 °C for 2 h, aliphatic region, zoom; labeling of **H<sub>m</sub>** protons, used hereinafter for the assignment of NMR spectra of supramolecular assemblies according to Table S1.

**Table S1.**  $^1\text{H}$  NMR chemical shifts of  $\text{H}_{\text{Py}}$  for hybrid complexes  $\text{Mo}_6\text{I}_8(\text{Py})_6(\text{Ru}(\text{CO})\text{Por})_n$  ( $n=1-6$ ) in 1:6 cluster—porphyrin mixture in acetone- $d_6$ .

| Hybrid species                                                                      | Non-coordinated $\text{H}_{\text{Py}}$ , ppm |                               | Coordinated $\text{H}'_{\text{Py}}$ , ppm |                                    |
|-------------------------------------------------------------------------------------|----------------------------------------------|-------------------------------|-------------------------------------------|------------------------------------|
|                                                                                     | $\text{H}_o$                                 | $\text{H}_m$                  | $\text{H}'_o$                             | $\text{H}'_m$                      |
| 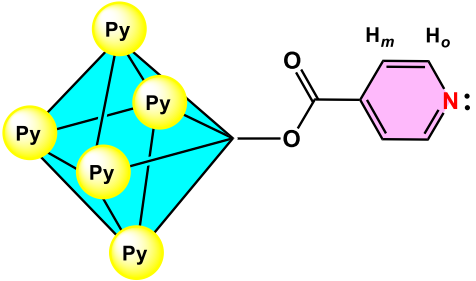   | 8.64<br>■                                    | 7.80                          |                                           |                                    |
|   | 8.57<br>▲                                    | 7.71:7.65<br>1:4 <sup>a</sup> | 1.20                                      | 5.61<br>●                          |
| <b>CP<sub>1</sub></b>                                                               |                                              |                               |                                           |                                    |
|  | 8.51<br>▲                                    | 7.56:7.50<br>3:4 <sup>a</sup> | 1.13                                      | 5.52:5.46<br>1:4 <sup>a</sup><br>● |
|  |                                              |                               |                                           |                                    |
| <i>cis</i> -CP <sub>2</sub>                                                         |                                              |                               |                                           |                                    |
| <i>trans</i> -CP <sub>2</sub>                                                       |                                              |                               |                                           |                                    |
|  | 8.44<br>▲                                    | 7.40:7.35<br>3:2 <sup>a</sup> | 1.07                                      | 5.36:5.31<br>2:3 <sup>a</sup><br>● |
|  |                                              |                               |                                           |                                    |
| <i>fac</i> -CP <sub>3</sub>                                                         |                                              |                               |                                           |                                    |
| <i>mer</i> -CP <sub>3</sub>                                                         |                                              |                               |                                           |                                    |

|                             |                               |           |                               |      |                                    |
|-----------------------------|-------------------------------|-----------|-------------------------------|------|------------------------------------|
|                             |                               | 8.37<br>▲ | 7.25:7.20<br>4:1 <sup>a</sup> | 1.00 | 5.21:5.16<br>3:2 <sup>a</sup><br>● |
| <i>cis</i> -CP <sub>4</sub> | <i>trans</i> -CP <sub>4</sub> |           |                               |      |                                    |
|                             |                               | 8.30<br>▲ | 7.10                          | 0.93 | 5.06:5.01<br>4:1 <sup>a</sup><br>● |
| CP <sub>5</sub>             |                               |           |                               |      |                                    |
|                             |                               |           |                               | 0.87 | 4.91<br>●                          |
| CP <sub>6</sub>             |                               |           |                               |      |                                    |

<sup>a</sup>The relative intensities of the signals for *meta*-protons given in the table are consistent with the number of identical free and bound Py moieties located at *trans*-ordinates of a definite type in the CP<sub>n</sub> complexes, including the geometrical isomers (see above for details).

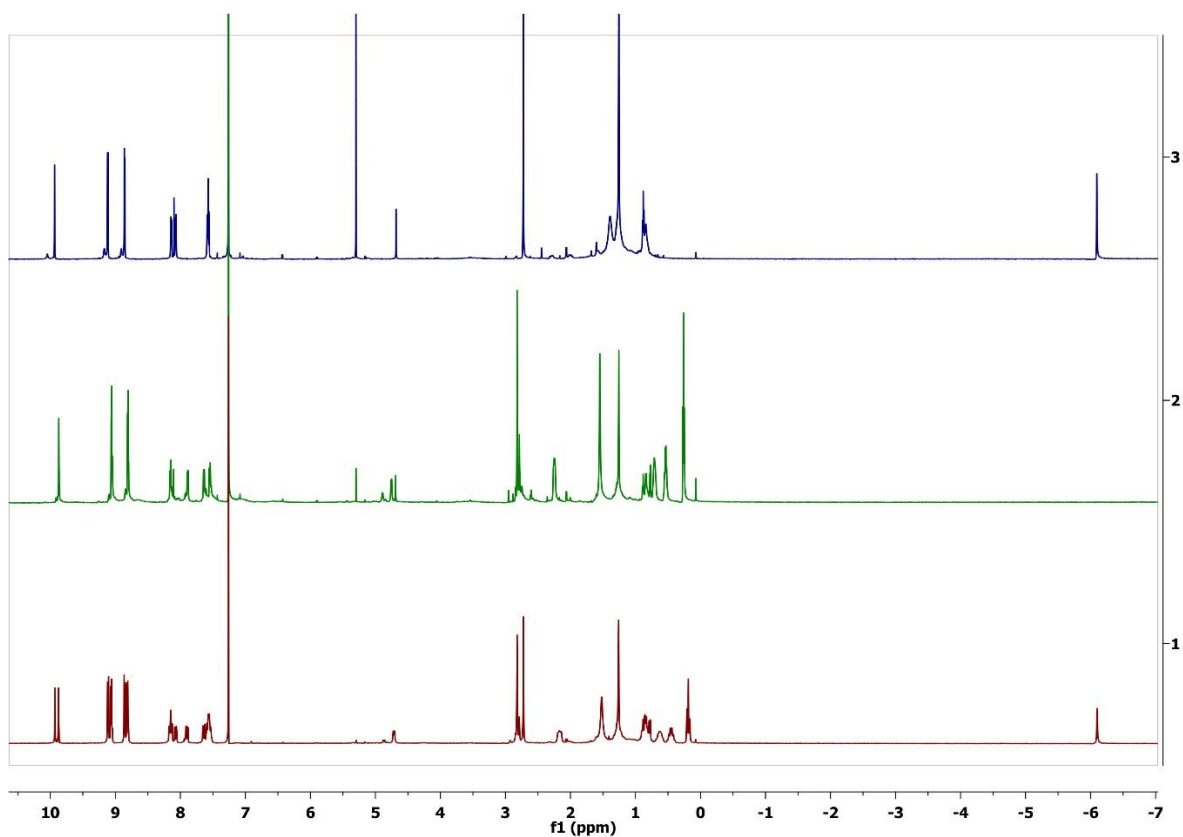

**Fig. S28**  $^1\text{H}$  NMR spectra ( $\text{CDCl}_3$ , 600 MHz, 303 K) of cluster:porphyrin mixture with C:P molar ratio equal to 1:12 (bottom), hybrid complexes  $\text{Mo}_6\text{I}_8(\text{Py})_6(\text{Ru}(\text{CO})\text{Por})_{5,6}$  (middle) and  $\text{RuDTolP}(\text{CO})\text{H}_2\text{O}$  (top), separated by gel-filtration (Bio-Beads S-X1), eluent  $\text{CH}_2\text{Cl}_2$ .

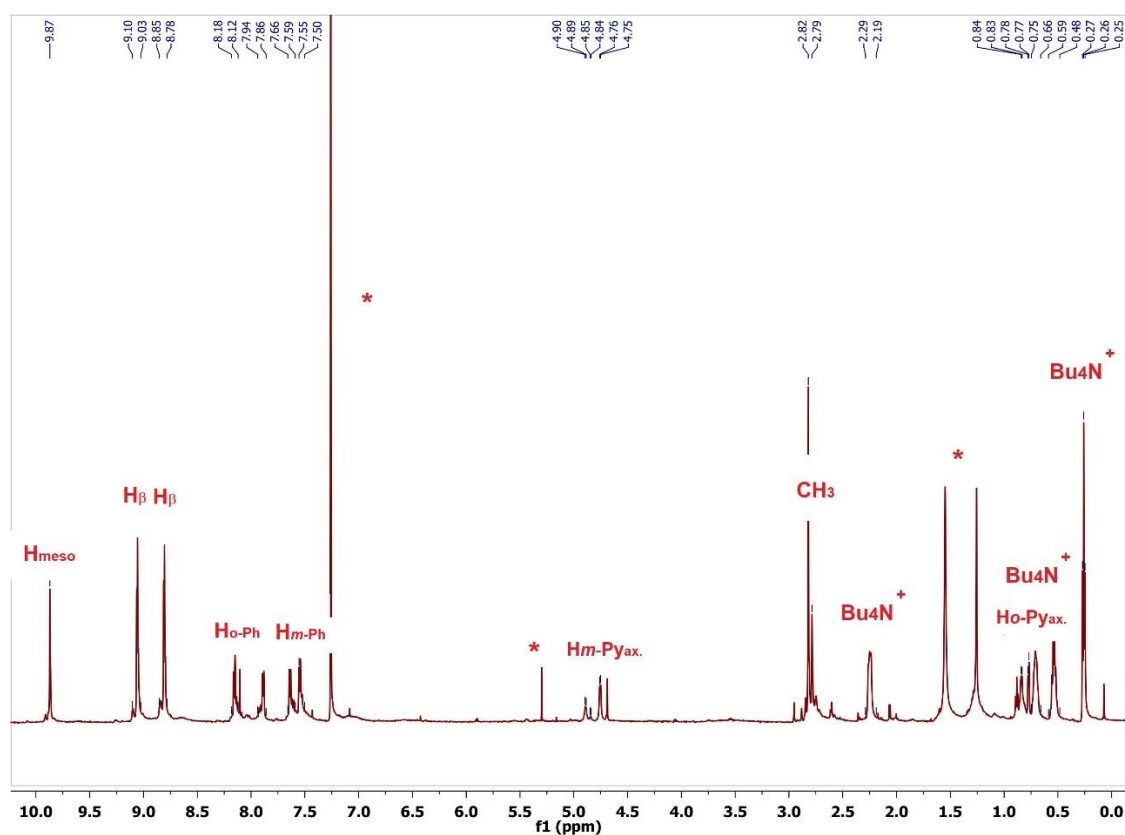

**Fig. S29**  $^1\text{H}$  NMR spectrum ( $\text{CDCl}_3$ , 600 MHz, 303 K) of hybrid complexes  $\text{Mo}_6\text{I}_8(\text{Py})_6(\text{Ru}(\text{CO})\text{Por})_5(\text{Bu}_4\text{N})_2$  and  $\text{Mo}_6\text{I}_8(\text{Py})_6(\text{Ru}(\text{CO})\text{Por})_6(\text{Bu}_4\text{N})_2$ . Solvent peaks are indicated with \* ( $\delta_{\text{H}}$  7.28 ppm –  $\text{CHCl}_3$ ,  $\delta_{\text{H}}$  5.30 ppm –  $\text{CH}_2\text{Cl}_2$ ,  $\delta_{\text{H}}$  1.56 ppm –  $\text{H}_2\text{O}$ ).

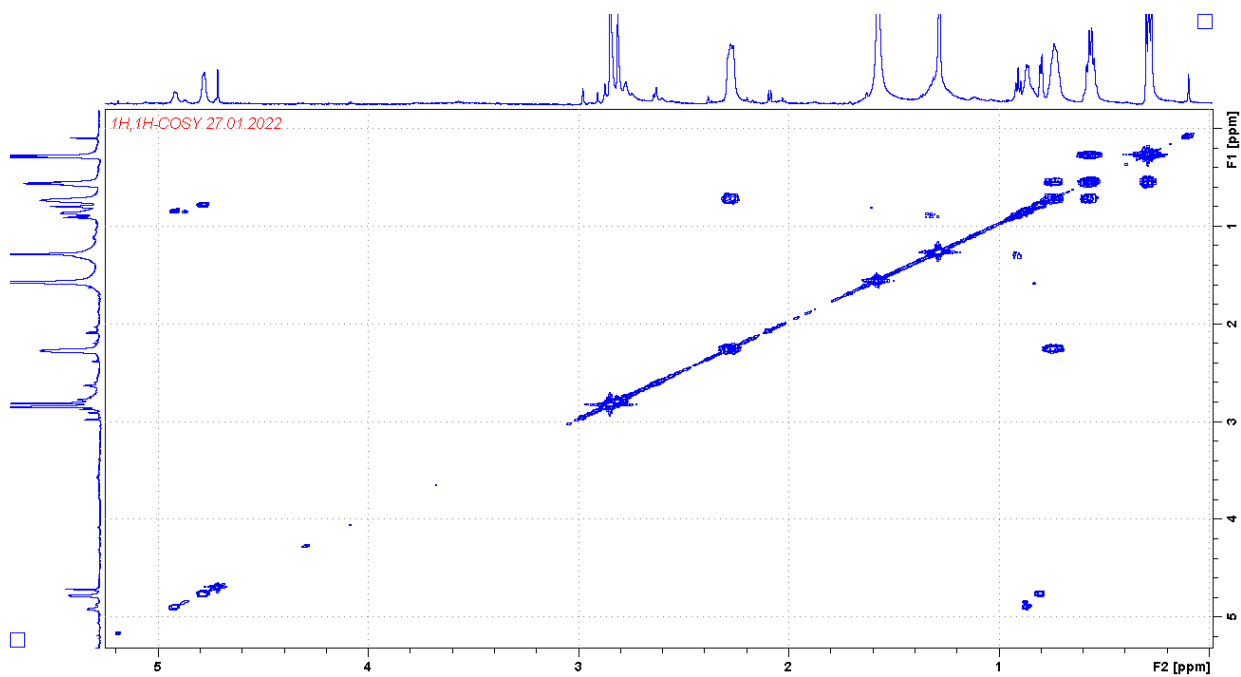

**Fig. S30**  $^1\text{H}$ - $^1\text{H}$  COSY NMR spectrum ( $\text{CDCl}_3$ , 600 MHz, 303 K) of hybrid complexes  $\text{Mo}_6\text{I}_8(\text{Py})_6(\text{Ru}(\text{CO})\text{Por})_5(\text{Bu}_4\text{N})_2$  and  $\text{Mo}_6\text{I}_8(\text{Py})_6(\text{Ru}(\text{CO})\text{Por})_6(\text{Bu}_4\text{N})_2$ , aliphatic region.

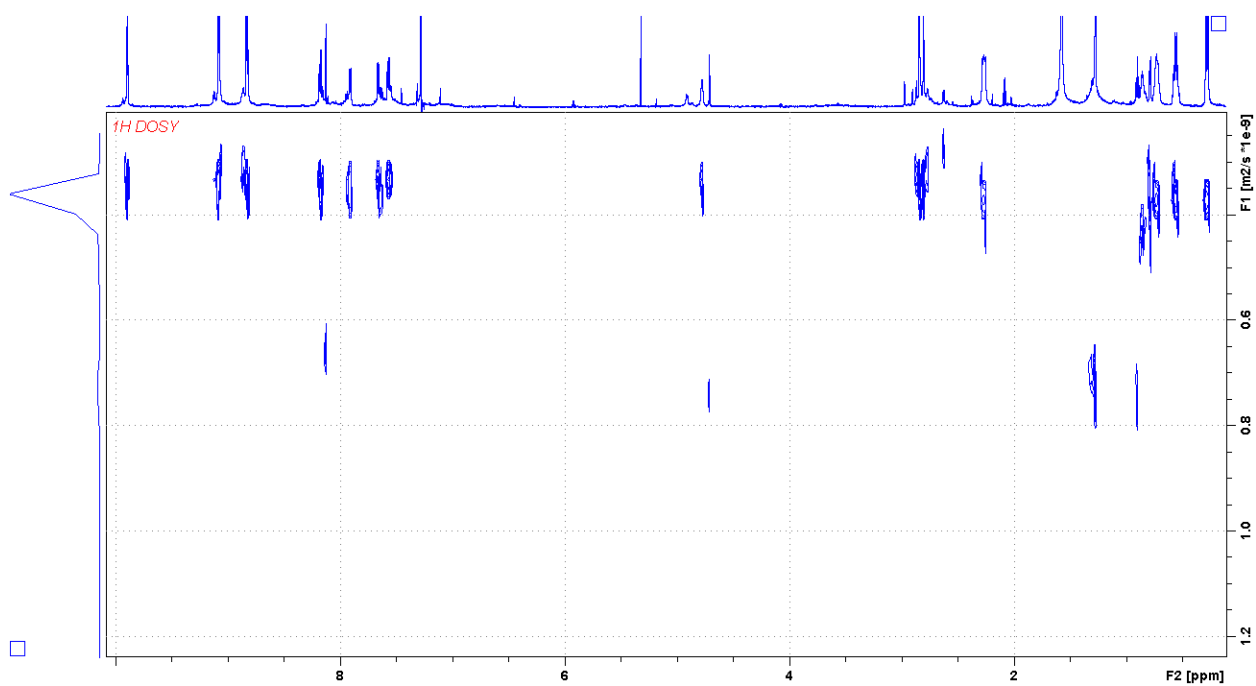

**Fig. S31** DOSY  $^1\text{H}$  NMR spectra ( $\text{CDCl}_3$ , 600 MHz, 303 K) of hybrid complexes  $\text{Mo}_6\text{I}_8(\text{Py})_6(\text{Ru}(\text{CO})\text{Por})_5(\text{Bu}_4\text{N})_2$  and  $\text{Mo}_6\text{I}_8(\text{Py})_6(\text{Ru}(\text{CO})\text{Por})_6(\text{Bu}_4\text{N})_2$ .

### 2.3.1. DOSY Experiments

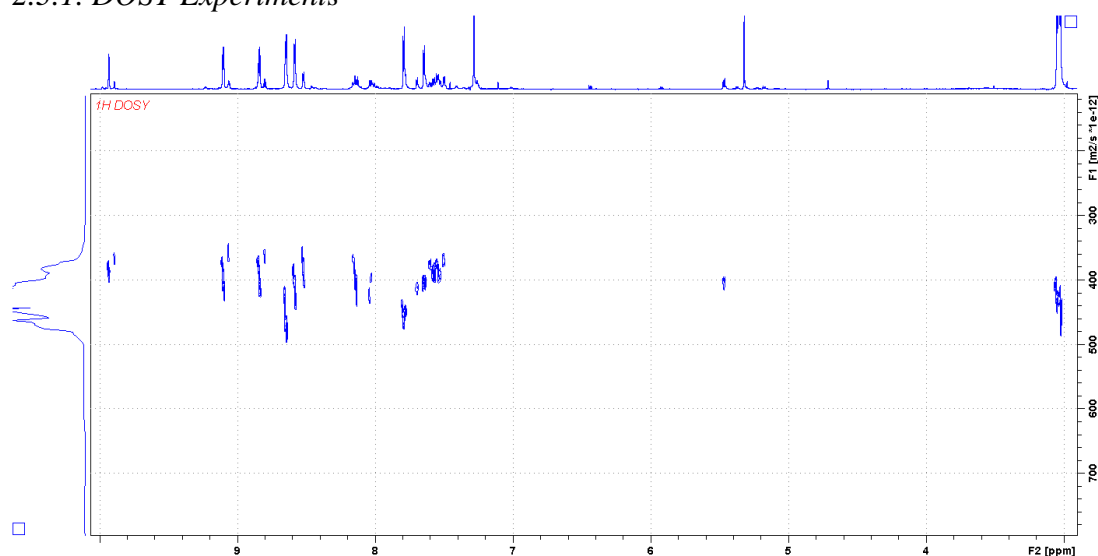

**Fig. S32** DOSY  $^1\text{H}$  NMR spectra ( $\text{CDCl}_3$ , 600 MHz, 303 K) of 1:1 cluster—porphyrin mixture.

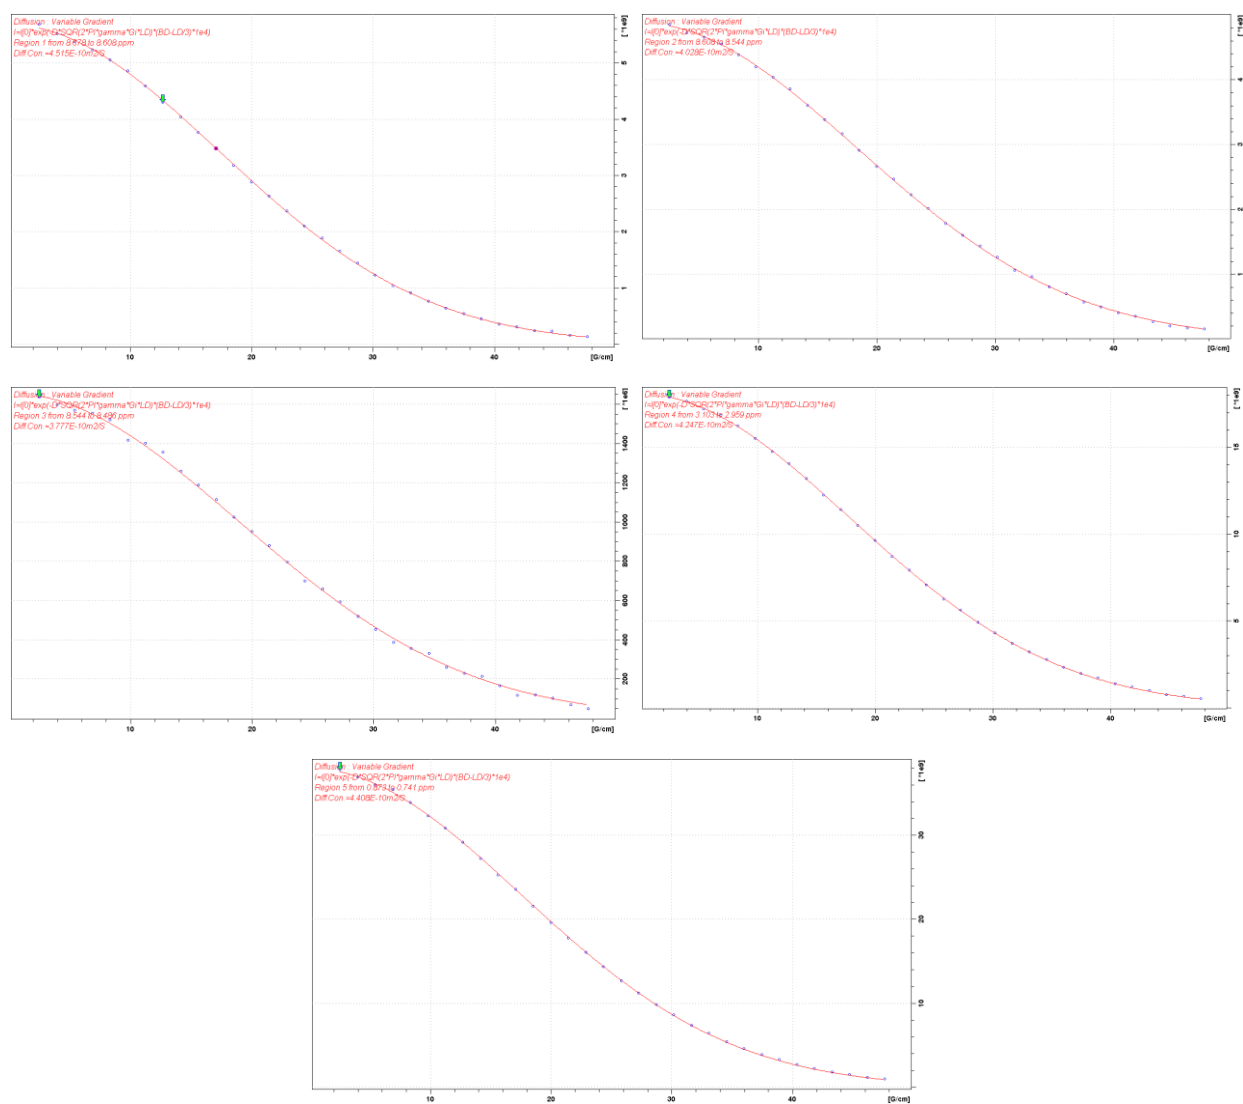

**Fig. S33** Echo damping as a function of gradient strength  $g$  for the non-coordinated  $\text{Ho}$ -Py signals of **PyMoC**, **CP<sub>1</sub>** and **CP<sub>2</sub>** and for  $\text{NCH}_2$ - and  $-\text{CH}_3$  of **Bu<sub>4</sub>N<sup>+</sup>** in 1:1 cluster:porphyrin mixture in  $\text{CDCl}_3$ . Measurement conditions: diffusion time, 140 ms; gradient pulse duration, 1950  $\mu\text{s}$ .

Molecular weights (*M*) of assemblies (Figure S32 and S34) have been estimated using the fact that the ratio of the diffusion coefficients of two different molecular species (*D*<sub>1</sub>/*D*<sub>2</sub>) is inversely proportional to the square root or to the cube root of their molecular weights *M*<sub>2</sub>/*M*<sub>1</sub> for rod-like and spherical molecules, respectively<sup>6</sup>:

$$\sqrt[3]{\frac{M_2}{M_1}} \leq \frac{D_1}{D_2} \leq \sqrt{\frac{M_2}{M_1}}$$

Comparison of the ratios of experimental diffusion coefficients and cubic or square roots of the ratios of theoretical molecular weights when different **CP<sub>n</sub>** species are used as reference ones (Tables S2 and S3) shows a good match between them. The most pronounced discrepancy between the corresponding values is observed when the cluster molecule is used as a reference for estimating the molecular weights of hybrid complexes, which indicates that the binding of the first porphyrin molecule to the cluster core leads to a considerable change in the shape of the resulting species compared to that of the initial **PyMoC**; therefore, we believe that it is more correct to evaluate the molecular weights using neighboring hybrid species as reference molecules.

**Table S2.** Experimental diffusion coefficients (*D*<sub>s</sub>) of **PyMoC** and hybrid complexes Mo<sub>6</sub>I<sub>8</sub>(Py)<sub>6</sub>(Ru(CO)Porph)<sub>1,2</sub> in 1:1 cluster—porphyrin mixture in CDCl<sub>3</sub> according DOSY-NMR data.

| Species                                              | <i>D</i> <sub>s</sub> , m <sup>2</sup> s <sup>-1a</sup> | <i>M</i> <sub>theor</sub> , Da <sup>b</sup> | $\sqrt[3]{\frac{M_{CPm}}{M_{CPn}}}$ | $\frac{D_{CPn}}{D_{CPm}}$ | $\sqrt{\frac{M_{CPm}}{M_{CPn}}}$ |
|------------------------------------------------------|---------------------------------------------------------|---------------------------------------------|-------------------------------------|---------------------------|----------------------------------|
| <b>PyMoC</b>                                         | 4.52x10 <sup>-10</sup>                                  | 2807                                        |                                     |                           |                                  |
| <b>CP<sub>1</sub></b>                                | 4.03x10 <sup>-10</sup>                                  | 3425                                        |                                     |                           |                                  |
| <b>CP<sub>2</sub></b>                                | 3.78x10 <sup>-10</sup>                                  | 4042                                        |                                     |                           |                                  |
| <b>Bu<sub>4</sub>N<sup>+</sup>(CH<sub>3</sub>-)</b>  | 4.41x10 <sup>-10</sup>                                  |                                             |                                     |                           |                                  |
| <b>Bu<sub>4</sub>N<sup>+</sup>(NCH<sub>2</sub>-)</b> | 4.25 x10 <sup>-10</sup>                                 |                                             |                                     |                           |                                  |
| <b>n = 0, m = 1</b>                                  |                                                         |                                             |                                     |                           |                                  |
|                                                      |                                                         |                                             | 1.07                                | 1.12                      | 1.10                             |
| <b>n = 0, m = 2</b>                                  |                                                         |                                             |                                     |                           |                                  |
|                                                      |                                                         |                                             | 1.13                                | 1.2                       | 1.19                             |
| <b>n = 1, m = 2</b>                                  |                                                         |                                             |                                     |                           |                                  |
|                                                      |                                                         |                                             | 1.06                                | 1.07                      | 1.08                             |

<sup>a</sup> The *D*<sub>s</sub> values determined for non-coordinated H<sub>o</sub>-Py of the cluster and hybrid complexes.

<sup>b</sup> Molecular weight *M*<sub>theor</sub> was calculated for Mo<sub>6</sub>I<sub>8</sub>(Py)<sub>6</sub>(Ru(CO)Por)<sub>n</sub>[(Bu<sub>4</sub>N)<sub>2</sub> (n=0-2)].



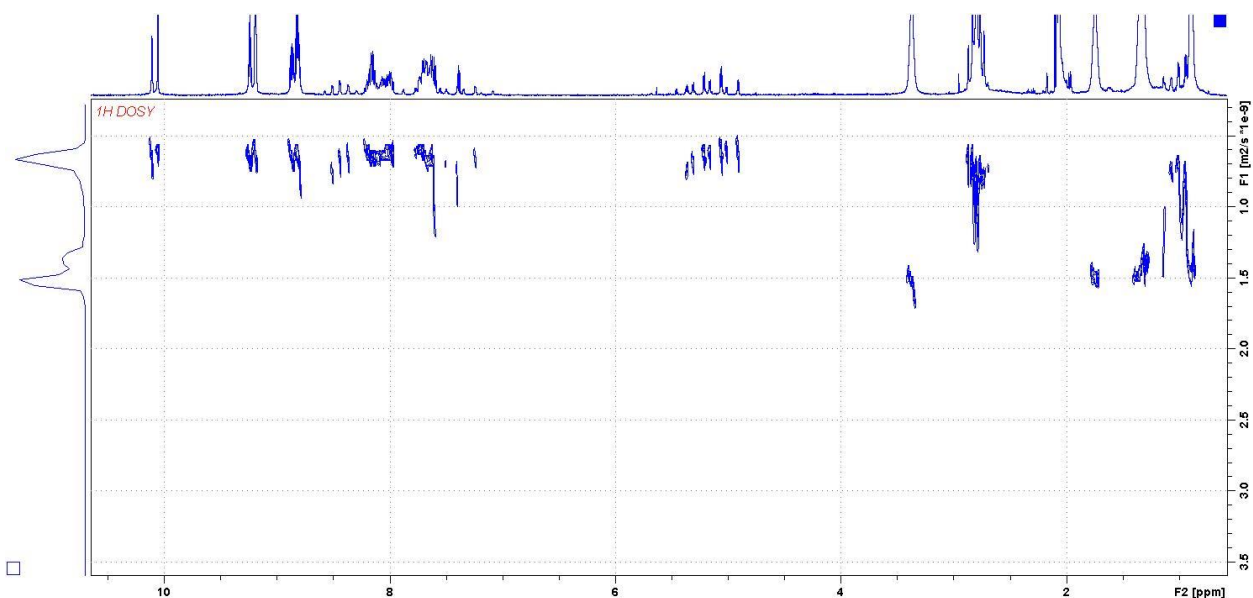

**Fig. S34** DOSY  $^1\text{H}$  NMR spectrum (acetone- $d_6$ , 600 MHz, 303 K) of 1:7 cluster—porphyrin mixture.

**Table S3.** Experimental diffusion coefficients ( $D_s$ ) of **PyMoC** and hybrid complexes  $\text{Mo}_6\text{I}_8(\text{Py})_6(\text{Ru}(\text{CO})\text{Por})_n$  ( $n=2-6$ ) in 1:7 cluster—porphyrin mixture in acetone- $d_6$  according to DOSY-NMR data.

| Species                                                | $D_s, \text{m}^2/\text{s}$          | $M_{\text{theor}}, \text{Da}^c$ |
|--------------------------------------------------------|-------------------------------------|---------------------------------|
| <b>CP<sub>2</sub></b>                                  | $7.10 \times 10^{-10}$ <sup>a</sup> | 3558                            |
| <b>CP<sub>3</sub></b>                                  | $6.35 \times 10^{-10}$ <sup>a</sup> | 4176                            |
| <b>CP<sub>4</sub></b>                                  | $5.92 \times 10^{-10}$ <sup>b</sup> | 4794                            |
| <b>CP<sub>5</sub></b>                                  | $5.63 \times 10^{-10}$ <sup>b</sup> | 5412                            |
| <b>CP<sub>6</sub></b>                                  | $5.48 \times 10^{-10}$ <sup>b</sup> | 6029                            |
| <b>Bu<sub>4</sub>N<sup>+</sup> (-NCH<sub>2</sub>-)</b> | $1.54 \times 10^{-9}$               | -                               |

| $\sqrt[3]{\frac{M_{\text{CPm}}}{M_{\text{CPn}}}}$ | $\frac{D_{\text{CPn}}}{D_{\text{CPm}}}$ | $\sqrt{\frac{M_{\text{CPm}}}{M_{\text{CPn}}}}$ |
|---------------------------------------------------|-----------------------------------------|------------------------------------------------|
| <b>n = 2, m = 3</b>                               |                                         |                                                |
| 1.05                                              | 1.12                                    | 1.08                                           |
| <b>n = 3, m = 4</b>                               |                                         |                                                |
| 1.05                                              | 1.07                                    | 1.07                                           |
| <b>n = 4, m = 5</b>                               |                                         |                                                |
| 1.04                                              | 1.05                                    | 1.06                                           |
| <b>n = 5, m = 6</b>                               |                                         |                                                |
| 1.04                                              | 1.03                                    | 1.05                                           |

<sup>a</sup> The  $D_s$  values determined for non-coordinated *Ho-Py* of the cluster and hybrid complexes.

<sup>b</sup> The  $D_s$  values determined for coordinated *H'm-Py* of hybrid complexes.

<sup>c</sup> Molecular weight  $M_{\text{theor}}$  was calculated for  $[\text{Mo}_6\text{I}_8(\text{Py})_6(\text{Ru}(\text{CO})\text{Por})_n]^{2-}$  ( $n=1-6$ ).

## 2.4. FT-IR spectra

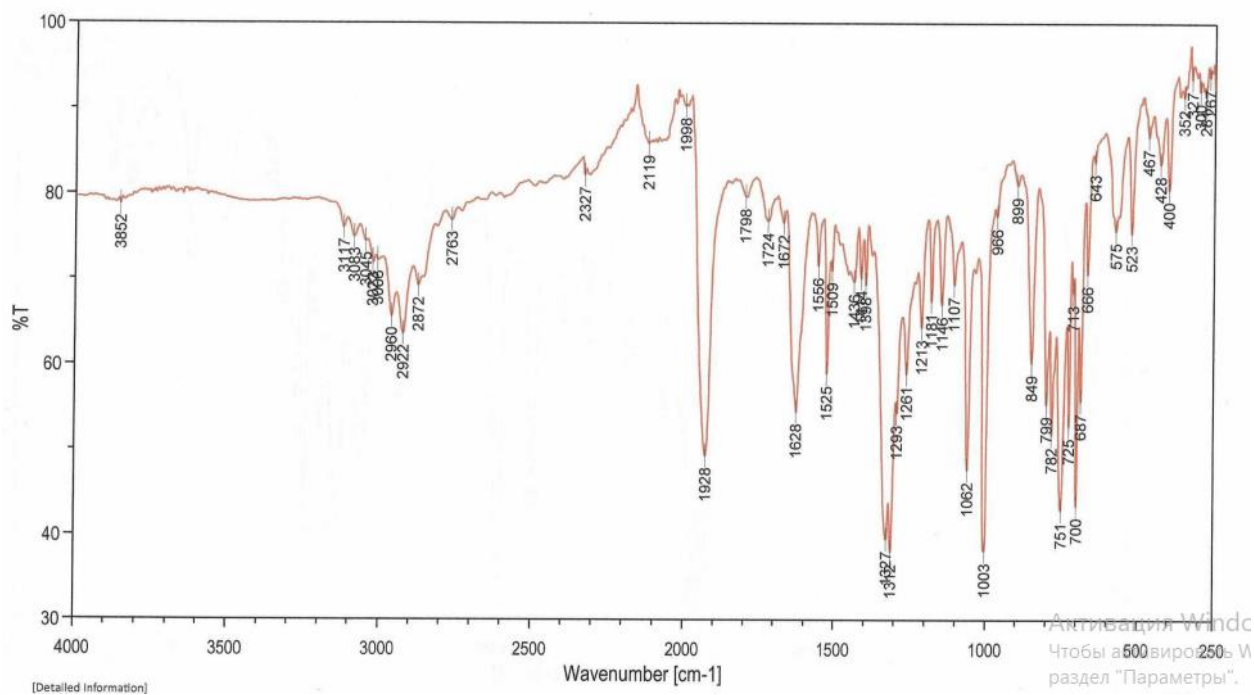

**Fig. S35** FT-IR spectrum of hybrid complexes  $\text{Mo}_6\text{I}_8(\text{Py})_6(\text{Ru}(\text{CO})\text{Por})_5(\text{Bu}_4\text{N})_2$  and  $\text{Mo}_6\text{I}_8(\text{Py})_6(\text{Ru}(\text{CO})\text{Por})_6(\text{Bu}_4\text{N})_2$ .

## 2.5. Single-Crystal X-ray Analysis

**Table S4.** Crystal data and structure refinement for **RuDTolP(CO)H<sub>2</sub>O** and **RuDTolP(CO)Py**.

| Identification code                         | <b>RuDTolP(CO)H<sub>2</sub>O</b>                                                 | <b>RuDTolP(CO)Py</b>                                                                      |
|---------------------------------------------|----------------------------------------------------------------------------------|-------------------------------------------------------------------------------------------|
| CCDC number                                 | 2173217                                                                          | 2173218                                                                                   |
| Empirical formula                           | C <sub>37</sub> H <sub>26</sub> Cl <sub>6</sub> N <sub>4</sub> O <sub>2</sub> Ru | C <sub>41.5</sub> H <sub>29</sub> Cl <sub>4.49</sub> D <sub>1.16</sub> N <sub>5</sub> ORu |
| Formula weight                              | 872.39                                                                           | 876.26                                                                                    |
| Temperature/K                               | 140(2)                                                                           | 100(2)                                                                                    |
| Crystal system                              | monoclinic                                                                       | trigonal                                                                                  |
| Space group                                 | C2/c                                                                             | R-3c                                                                                      |
| a/Å                                         | 21.6281(11)                                                                      | 15.1883(4)                                                                                |
| b/Å                                         | 9.4437(4)                                                                        | 15.1883(4)                                                                                |
| c/Å                                         | 19.2876(9)                                                                       | 85.428(4)                                                                                 |
| α/°                                         | 90                                                                               | 90                                                                                        |
| β/°                                         | 114.1080(10)                                                                     | 90                                                                                        |
| γ/°                                         | 90                                                                               | 120                                                                                       |
| Volume/Å <sup>3</sup>                       | 3595.9(3)                                                                        | 17066.7(11)                                                                               |
| Z                                           | 4                                                                                | 18                                                                                        |
| ρ <sub>calc</sub> /cm <sup>3</sup>          | 1.611                                                                            | 1.535                                                                                     |
| μ/mm <sup>-1</sup>                          | 0.923                                                                            | 0.771                                                                                     |
| F(000)                                      | 1752.0                                                                           | 7965.0                                                                                    |
| Crystal size/mm <sup>3</sup>                | 0.2 × 0.2 × 0.02                                                                 | 0.36 × 0.2 × 0.16                                                                         |
| Radiation                                   | MoKα (λ = 0.71073)                                                               | MoKα (λ = 0.71073)                                                                        |
| 2θ range for data collection/°              | 4.126 to 55.132                                                                  | 4.914 to 61.108                                                                           |
| Index ranges                                | -28 ≤ h ≤ 28, -12 ≤ k ≤ 12, -25 ≤ l ≤ 25                                         | -17 ≤ h ≤ 21, -21 ≤ k ≤ 18, -116 ≤ l ≤ 121                                                |
| Reflections collected                       | 19912                                                                            | 74663                                                                                     |
| Independent reflections                     | 4143 [R <sub>int</sub> = 0.0545, R <sub>sigma</sub> = 0.0551]                    | 5828 [R <sub>int</sub> = 0.0696, R <sub>sigma</sub> = 0.0341]                             |
| Data/restraints/parameters                  | 4143/0/272                                                                       | 5828/0/278                                                                                |
| Goodness-of-fit on F <sup>2</sup>           | 1.033                                                                            | 1.102                                                                                     |
| Final R indexes [I ≥ 2σ (I)]                | R <sub>1</sub> = 0.0382, wR <sub>2</sub> = 0.0831                                | R <sub>1</sub> = 0.0637, wR <sub>2</sub> = 0.1614                                         |
| Final R indexes [all data]                  | R <sub>1</sub> = 0.0616, wR <sub>2</sub> = 0.0902                                | R <sub>1</sub> = 0.0768, wR <sub>2</sub> = 0.1712                                         |
| Largest diff. peak/hole / e Å <sup>-3</sup> | 0.48/-0.76                                                                       | 2.85/-2.84                                                                                |

**Table S5.** Bond lengths for **RuDTolP(CO)H<sub>2</sub>O**.

| Atom  | Atom              | Length/Å | Atom  | Atom              | Length/Å |
|-------|-------------------|----------|-------|-------------------|----------|
| Ru(1) | N(1) <sup>1</sup> | 2.053(2) | C(3)  | C(4)              | 1.444(4) |
| Ru(1) | N(1)              | 2.053(2) | C(3)  | C(2)              | 1.352(4) |
| Ru(1) | N(2)              | 2.055(2) | C(10) | C(1) <sup>1</sup> | 1.401(4) |
| Ru(1) | N(2) <sup>1</sup> | 2.055(2) | C(10) | C(9)              | 1.409(4) |
| Ru(1) | O(2)              | 2.090(4) | C(5)  | C(4)              | 1.385(4) |
| Ru(1) | C(18)             | 1.988(5) | C(5)  | C(6)              | 1.394(4) |
| Ru(1) | C(18A)            | 2.090(4) | C(6)  | C(7)              | 1.445(4) |

| Atom   | Atom  | Length/Å | Atom   | Atom   | Length/Å  |
|--------|-------|----------|--------|--------|-----------|
| Ru(1)  | O(2A) | 1.988(5) | C(8)   | C(9)   | 1.430(4)  |
| Cl(02) | C(19) | 1.760(5) | C(8)   | C(7)   | 1.354(4)  |
| Cl(03) | C(19) | 1.762(5) | C(1)   | C(2)   | 1.451(3)  |
| Cl(04) | C(19) | 1.760(5) | C(17)  | C(16)  | 1.386(4)  |
| N(1)   | C(4)  | 1.372(3) | C(12)  | C(13)  | 1.385(4)  |
| N(1)   | C(1)  | 1.375(3) | C(16)  | C(14)  | 1.381(4)  |
| N(2)   | C(6)  | 1.373(3) | C(13)  | C(14)  | 1.384(4)  |
| N(2)   | C(9)  | 1.376(3) | C(14)  | C(15)  | 1.515(4)  |
| C(18)  | O(1)  | 1.077(5) | Cl(1)  | C(19A) | 1.745(18) |
| C(11)  | C(10) | 1.503(4) | C(19A) | Cl(3)  | 1.721(17) |
| C(11)  | C(17) | 1.392(4) | C(19A) | Cl(4)  | 1.727(19) |
| C(11)  | C(12) | 1.390(4) | O(1A)  | C(18A) | 1.034(8)  |

<sup>1</sup>1-X,+Y,3/2-Z

**Table S6.** Bond angles for **RuDTolP(CO)H<sub>2</sub>O**.

| Atom              | Atom  | Atom              | Angle/°    | Atom               | Atom  | Atom               | Angle/°  |
|-------------------|-------|-------------------|------------|--------------------|-------|--------------------|----------|
| N(1) <sup>1</sup> | Ru(1) | N(1)              | 179.45(12) | C(1) <sup>1</sup>  | C(10) | C(11)              | 116.9(2) |
| N(1)              | Ru(1) | N(2)              | 91.18(8)   | C(1) <sup>1</sup>  | C(10) | C(9)               | 125.2(2) |
| N(1) <sup>1</sup> | Ru(1) | N(2) <sup>1</sup> | 91.18(8)   | C(9)               | C(10) | C(11)              | 117.8(2) |
| N(1) <sup>1</sup> | Ru(1) | N(2)              | 88.80(8)   | C(4)               | C(5)  | C(6)               | 127.6(2) |
| N(1)              | Ru(1) | N(2) <sup>1</sup> | 88.81(8)   | N(1)               | C(4)  | C(3)               | 109.1(2) |
| N(1) <sup>1</sup> | Ru(1) | O(2)              | 89.73(6)   | N(1)               | C(4)  | C(5)               | 125.6(2) |
| N(1)              | Ru(1) | O(2)              | 89.73(6)   | C(5)               | C(4)  | C(3)               | 125.3(2) |
| N(1) <sup>1</sup> | Ru(1) | C(18A)            | 89.73(6)   | N(2)               | C(6)  | C(5)               | 125.4(3) |
| N(1)              | Ru(1) | C(18A)            | 89.73(6)   | N(2)               | C(6)  | C(7)               | 109.4(2) |
| N(2)              | Ru(1) | N(2) <sup>1</sup> | 176.92(12) | C(5)               | C(6)  | C(7)               | 125.3(2) |
| N(2) <sup>1</sup> | Ru(1) | O(2)              | 88.46(6)   | C(7)               | C(8)  | C(9)               | 108.1(2) |
| N(2)              | Ru(1) | O(2)              | 88.46(6)   | N(1)               | C(1)  | C(10) <sup>1</sup> | 125.8(2) |
| N(2)              | Ru(1) | C(18A)            | 88.46(6)   | N(1)               | C(1)  | C(2)               | 108.7(2) |
| N(2) <sup>1</sup> | Ru(1) | C(18A)            | 88.46(6)   | C(10) <sup>1</sup> | C(1)  | C(2)               | 125.5(2) |
| C(18)             | Ru(1) | N(1) <sup>1</sup> | 90.27(6)   | C(16)              | C(17) | C(11)              | 120.8(3) |
| C(18)             | Ru(1) | N(1)              | 90.27(6)   | C(13)              | C(12) | C(11)              | 121.0(3) |
| C(18)             | Ru(1) | N(2)              | 91.54(6)   | C(3)               | C(2)  | C(1)               | 107.3(2) |
| C(18)             | Ru(1) | N(2) <sup>1</sup> | 91.54(6)   | C(14)              | C(16) | C(17)              | 121.3(3) |
| C(18)             | Ru(1) | O(2)              | 180.0      | N(2)               | C(9)  | C(10)              | 124.8(2) |
| O(2A)             | Ru(1) | N(1)              | 90.27(6)   | N(2)               | C(9)  | C(8)               | 109.1(2) |
| O(2A)             | Ru(1) | N(2)              | 91.54(6)   | C(10)              | C(9)  | C(8)               | 126.1(2) |
| O(2A)             | Ru(1) | C(18A)            | 180.0      | C(14)              | C(13) | C(12)              | 121.2(3) |
| C(4)              | N(1)  | Ru(1)             | 125.16(18) | C(8)               | C(7)  | C(6)               | 106.5(2) |
| C(4)              | N(1)  | C(1)              | 107.5(2)   | C(16)              | C(14) | C(13)              | 118.0(3) |
| C(1)              | N(1)  | Ru(1)             | 127.35(17) | C(16)              | C(14) | C(15)              | 121.2(3) |
| C(6)              | N(2)  | Ru(1)             | 125.10(18) | C(13)              | C(14) | C(15)              | 120.8(3) |
| C(6)              | N(2)  | C(9)              | 106.9(2)   | Cl(02)             | C(19) | Cl(03)             | 110.2(3) |

| Atom Atom Atom    | Angle/°    | Atom Atom Atom      | Angle/°   |
|-------------------|------------|---------------------|-----------|
| C(9) N(2) Ru(1)   | 127.97(17) | Cl(02) C(19) Cl(04) | 109.1(2)  |
| O(1) C(18) Ru(1)  | 180.0      | Cl(04) C(19) Cl(03) | 110.9(3)  |
| C(17) C(11) C(10) | 121.6(2)   | Cl(3) C(19A) Cl(1)  | 107.3(9)  |
| C(12) C(11) C(10) | 120.7(3)   | Cl(3) C(19A) Cl(4)  | 104.3(10) |
| C(12) C(11) C(17) | 117.7(3)   | Cl(4) C(19A) Cl(1)  | 107.8(9)  |
| C(2) C(3) C(4)    | 107.4(2)   | O(1A) C(18A) Ru(1)  | 180.0     |

<sup>1</sup>1-X,+Y,3/2-Z

**Table S7.** Bond lengths for **RuDTolP(CO)Py**.

| Atom Atom           | Length/Å | Atom Atom            | Length/Å  |
|---------------------|----------|----------------------|-----------|
| Ru1 N1 <sup>1</sup> | 2.052(3) | C14 C16              | 1.402(6)  |
| Ru1 N1              | 2.052(3) | C14 C16A             | 1.62(2)   |
| Ru1 N2 <sup>1</sup> | 2.052(3) | C14 C13A             | 1.30(3)   |
| Ru1 N2              | 2.052(3) | C16 C17              | 1.400(6)  |
| Ru1 N3              | 2.200(4) | C16A C17A            | 1.40(3)   |
| Ru1 C18             | 1.830(5) | C19 C20              | 1.396(5)  |
| O1 C18              | 1.157(7) | C20 C21              | 1.385(4)  |
| N1 C1               | 1.372(5) | C11 C22              | 1.762(4)  |
| N1 C4               | 1.378(4) | C22 D22              | 0.9800    |
| N2 C6               | 1.384(4) | C12 C24              | 1.753(5)  |
| N2 C9               | 1.361(5) | C12A C24             | 2.09(3)   |
| N3 C19 <sup>1</sup> | 1.345(4) | C24 D24              | 0.9800    |
| N3 C19              | 1.345(4) | C24 D24A             | 0.9800    |
| C1 C2               | 1.445(5) | C13 C25 <sup>2</sup> | 1.599(19) |
| C1 C10 <sup>1</sup> | 1.393(5) | C13 C25 <sup>3</sup> | 1.704(18) |
| C2 C3               | 1.348(6) | C13 C25              | 1.599(19) |
| C3 C4               | 1.456(5) | C13 C25 <sup>4</sup> | 1.704(18) |
| C4 C5               | 1.395(5) | C13 C25 <sup>5</sup> | 1.704(18) |
| C5 C6               | 1.395(5) | C13 C25 <sup>6</sup> | 1.599(19) |
| C5 C11              | 1.499(4) | C14 C14 <sup>4</sup> | 2.302(6)  |
| C6 C7               | 1.448(5) | C14 C14 <sup>5</sup> | 2.302(6)  |
| C7 C8               | 1.349(6) | C14 C25              | 1.78(2)   |
| C8 C9               | 1.442(5) | C14 C25 <sup>6</sup> | 2.25(2)   |
| C9 C10              | 1.394(5) | C14 C25 <sup>5</sup> | 1.553(19) |
| C11 C12             | 1.379(6) | C25 C25 <sup>5</sup> | 0.810(17) |
| C11 C17             | 1.406(5) | C25 C25 <sup>3</sup> | 1.61(3)   |
| C11 C17A            | 1.53(2)  | C25 C25 <sup>2</sup> | 1.39(3)   |
| C11 C12A            | 1.30(3)  | C25 C25 <sup>6</sup> | 1.39(3)   |
| C12 C13             | 1.391(6) | C25 C25 <sup>4</sup> | 0.810(17) |
| C13 C14             | 1.364(7) | C12A C13A            | 1.44(4)   |
| C14 C15             | 1.518(5) |                      |           |

<sup>1</sup>1/3-Y+X,2/3-Y,7/6-Z; <sup>2</sup>-Y,+X-Y,+Z; <sup>3</sup>-X,-Y,1-Z; <sup>4</sup>-Y+X,+X,1-Z; <sup>5</sup>+Y,-X+Y,1-Z; <sup>6</sup>+Y-X,-X,+Z

| Table S8. Bond angles for RuDTolP(CO)Py |      |                  |            |  |                   |      |                   |            |
|-----------------------------------------|------|------------------|------------|--|-------------------|------|-------------------|------------|
| Atom                                    | Atom | Atom             | Angle/°    |  | Atom              | Atom | Atom              | Angle/°    |
| N1                                      | Ru1  | N1 <sup>1</sup>  | 175.89(16) |  | C20               | C21  | C20 <sup>1</sup>  | 118.1(5)   |
| N1 <sup>1</sup>                         | Ru1  | N3               | 87.94(8)   |  | Cl1 <sup>2</sup>  | C22  | Cl1               | 112.3(3)   |
| N1                                      | Ru1  | N3               | 87.94(8)   |  | Cl1 <sup>3</sup>  | C22  | Cl1               | 112.3(3)   |
| N2                                      | Ru1  | N1               | 88.57(12)  |  | Cl1 <sup>3</sup>  | C22  | Cl1 <sup>2</sup>  | 112.3(3)   |
| N2 <sup>1</sup>                         | Ru1  | N1 <sup>1</sup>  | 88.59(12)  |  | Cl1 <sup>2</sup>  | C22  | D22               | 106.5      |
| N2 <sup>1</sup>                         | Ru1  | N1               | 91.29(12)  |  | Cl1               | C22  | D22               | 106.5      |
| N2                                      | Ru1  | N1 <sup>1</sup>  | 91.29(12)  |  | Cl1 <sup>3</sup>  | C22  | D22               | 106.5      |
| N2                                      | Ru1  | N2 <sup>1</sup>  | 176.36(16) |  | Cl2 <sup>4</sup>  | C24  | Cl2 <sup>5</sup>  | 108.1(3)   |
| N2 <sup>1</sup>                         | Ru1  | N3               | 88.18(8)   |  | Cl2 <sup>4</sup>  | C24  | Cl2               | 108.1(3)   |
| N2                                      | Ru1  | N3               | 88.18(8)   |  | Cl2               | C24  | Cl2 <sup>5</sup>  | 108.1(3)   |
| C18                                     | Ru1  | N1 <sup>1</sup>  | 92.06(8)   |  | Cl2               | C24  | Cl2A <sup>4</sup> | 74.1(9)    |
| C18                                     | Ru1  | N1               | 92.06(8)   |  | Cl2 <sup>5</sup>  | C24  | Cl2A <sup>5</sup> | 36.5(9)    |
| C18                                     | Ru1  | N2               | 91.82(8)   |  | Cl2 <sup>4</sup>  | C24  | Cl2A <sup>5</sup> | 74.1(9)    |
| C18                                     | Ru1  | N2 <sup>1</sup>  | 91.82(8)   |  | Cl2 <sup>4</sup>  | C24  | Cl2A <sup>4</sup> | 36.5(9)    |
| C18                                     | Ru1  | N3               | 180.0      |  | Cl2               | C24  | Cl2A <sup>5</sup> | 132.5(9)   |
| C1                                      | N1   | Ru1              | 125.0(2)   |  | Cl2 <sup>5</sup>  | C24  | Cl2A <sup>4</sup> | 132.4(9)   |
| C1                                      | N1   | C4               | 107.5(3)   |  | Cl2 <sup>5</sup>  | C24  | D24               | 110.8      |
| C4                                      | N1   | Ru1              | 127.4(3)   |  | Cl2               | C24  | D24               | 110.8      |
| C6                                      | N2   | Ru1              | 127.2(3)   |  | Cl2 <sup>4</sup>  | C24  | D24               | 110.8      |
| C9                                      | N2   | Ru1              | 125.3(2)   |  | Cl2A <sup>4</sup> | C24  | Cl2A              | 106.5(9)   |
| C9                                      | N2   | C6               | 107.4(3)   |  | Cl2A <sup>5</sup> | C24  | Cl2A              | 106.5(8)   |
| C19                                     | N3   | Ru1              | 121.3(2)   |  | Cl2A <sup>4</sup> | C24  | D24A              | 112.3      |
| C19 <sup>1</sup>                        | N3   | Ru1              | 121.3(2)   |  | Cl2A <sup>5</sup> | C24  | D24A              | 112.3      |
| C19                                     | N3   | C19 <sup>1</sup> | 117.4(4)   |  | Cl2A              | C24  | D24A              | 112.3      |
| N1                                      | C1   | C2               | 109.3(3)   |  | C25 <sup>6</sup>  | Cl3  | C25 <sup>7</sup>  | 48.0(10)   |
| N1                                      | C1   | C10 <sup>1</sup> | 125.5(3)   |  | C25               | Cl3  | C25 <sup>8</sup>  | 28.2(4)    |
| C10 <sup>1</sup>                        | C1   | C2               | 125.3(4)   |  | C25 <sup>9</sup>  | Cl3  | C25 <sup>8</sup>  | 58.1(10)   |
| C3                                      | C2   | C1               | 107.2(4)   |  | C25 <sup>8</sup>  | Cl3  | C25 <sup>7</sup>  | 48.0(10)   |
| C2                                      | C3   | C4               | 107.7(3)   |  | C25               | Cl3  | C25 <sup>7</sup>  | 28.2(4)    |
| N1                                      | C4   | C3               | 108.3(3)   |  | C25 <sup>9</sup>  | Cl3  | C25               | 51.4(10)   |
| N1                                      | C4   | C5               | 125.7(3)   |  | C25 <sup>10</sup> | Cl3  | C25 <sup>9</sup>  | 51.4(10)   |
| C5                                      | C4   | C3               | 126.0(3)   |  | C25 <sup>10</sup> | Cl3  | C25 <sup>7</sup>  | 58.1(10)   |
| C4                                      | C5   | C6               | 124.9(3)   |  | C25 <sup>10</sup> | Cl3  | C25               | 51.4(10)   |
| C4                                      | C5   | C11              | 117.6(3)   |  | C25 <sup>10</sup> | Cl3  | C25 <sup>8</sup>  | 28.2(4)    |
| C6                                      | C5   | C11              | 117.4(3)   |  | C25 <sup>9</sup>  | Cl3  | C25 <sup>7</sup>  | 28.2(4)    |
| N2                                      | C6   | C5               | 125.7(3)   |  | Cl4 <sup>8</sup>  | Cl4  | Cl4 <sup>7</sup>  | 118.55(12) |
| N2                                      | C6   | C7               | 108.3(3)   |  | C25 <sup>7</sup>  | Cl4  | Cl4 <sup>7</sup>  | 50.6(8)    |
| C5                                      | C6   | C7               | 126.0(3)   |  | C25 <sup>9</sup>  | Cl4  | Cl4 <sup>7</sup>  | 39.8(4)    |
| C8                                      | C7   | C6               | 107.5(3)   |  | C25               | Cl4  | Cl4 <sup>7</sup>  | 77.5(6)    |
| C7                                      | C8   | C9               | 107.2(4)   |  | C25 <sup>7</sup>  | Cl4  | C25 <sup>9</sup>  | 12.5(9)    |
| N2                                      | C9   | C8               | 109.5(3)   |  | C25               | Cl4  | C25 <sup>9</sup>  | 38.0(10)   |
| N2                                      | C9   | C10              | 125.6(3)   |  | C25 <sup>7</sup>  | Cl4  | C25               | 27.0(8)    |

| Table S8. Bond angles for <b>RuDTolP(CO)Py</b> |           |  |                                        |           |  |  |
|------------------------------------------------|-----------|--|----------------------------------------|-----------|--|--|
| Atom Atom Atom                                 | Angle/°   |  | Atom Atom Atom                         | Angle/°   |  |  |
| C10 C9 C8                                      | 124.9(4)  |  | Cl3 C25 Cl3 <sup>6</sup>               | 121.9(10) |  |  |
| C1 <sup>1</sup> C10 C9                         | 127.3(4)  |  | Cl3 C25 Cl4 <sup>10</sup>              | 84.3(9)   |  |  |
| C5 C11 C17A                                    | 115.2(8)  |  | Cl3 <sup>6</sup> C25 Cl4 <sup>10</sup> | 88.1(9)   |  |  |
| C12 C11 C5                                     | 121.4(3)  |  | Cl3 C25 Cl4                            | 102.1(11) |  |  |
| C12 C11 C17                                    | 117.6(3)  |  | Cl3 <sup>6</sup> C25 Cl4               | 105.8(11) |  |  |
| C17 C11 C5                                     | 120.8(3)  |  | Cl3 C25 C25 <sup>6</sup>               | 64.2(12)  |  |  |
| C12AC11 C5                                     | 122.4(13) |  | Cl4 <sup>8</sup> C25 Cl3               | 123.8(13) |  |  |
| C12AC11 C17A                                   | 116.0(15) |  | Cl4 <sup>8</sup> C25 Cl4               | 87.1(8)   |  |  |
| C11 C12 C13                                    | 121.4(4)  |  | C25 <sup>9</sup> C25 Cl3               | 64.3(5)   |  |  |
| C14 C13 C12                                    | 121.5(4)  |  | C25 <sup>7</sup> C25 Cl3               | 83(2)     |  |  |
| C13 C14 C15                                    | 121.3(4)  |  | C25 <sup>10</sup> C25 Cl3              | 64.3(5)   |  |  |
| C13 C14 C16                                    | 118.3(4)  |  | C25 <sup>8</sup> C25 Cl3               | 83(2)     |  |  |
| C15 C14 C16A                                   | 116.6(8)  |  | C25 <sup>6</sup> C25 Cl4               | 120(2)    |  |  |
| C16 C14 C15                                    | 120.3(4)  |  | C25 <sup>9</sup> C25 Cl4               | 90(2)     |  |  |
| C13AC14 C15                                    | 122.8(14) |  | C25 <sup>10</sup> C25 Cl4              | 150(2)    |  |  |
| C13AC14 C16A                                   | 112.2(15) |  | C25 <sup>7</sup> C25 Cl4               | 61(2)     |  |  |
| C17 C16 C14                                    | 120.4(4)  |  | C25 <sup>8</sup> C25 Cl4               | 174(3)    |  |  |
| C17AC16AC14                                    | 115.4(16) |  | C25 <sup>7</sup> C25 C25 <sup>8</sup>  | 117.8(14) |  |  |
| C16 C17 C11                                    | 120.4(4)  |  | C25 <sup>7</sup> C25 C25 <sup>9</sup>  | 31.1(7)   |  |  |
| C16AC17AC11                                    | 118.3(16) |  | C25 <sup>8</sup> C25 C25 <sup>9</sup>  | 90.00(3)  |  |  |
| O1 C18 Ru1                                     | 180.0     |  | C11 C12AC13A                           | 122(2)    |  |  |
| N3 C19 C20                                     | 122.9(3)  |  | C14 C13AC12A                           | 122(3)    |  |  |
| C21 C20 C19                                    | 119.4(3)  |  |                                        |           |  |  |

<sup>1</sup>1/3-Y+X,2/3-Y,7/6-Z; <sup>2</sup>1-Y,1+X-Y,+Z; <sup>3</sup>+Y-X,1-X,+Z; <sup>4</sup>1-Y,+X-Y,+Z; <sup>5</sup>1+Y-X,1-X,+Z; <sup>6</sup>-X,-Y,1-Z; <sup>7</sup>+Y,-X+Y,1-Z; <sup>8</sup>-Y+X,+X,1-Z; <sup>9</sup>+Y-X,-X,+Z; <sup>10</sup>-Y,+X-Y,+Z

In both complexes, the ruthenium porphyrin unit has a typical geometry where the metal ion is located inside the porphyrin ring and adopts a usual octahedral geometry by coordinating a carbonyl ligand and a water or pyridine molecule in the remaining axial position (Table S9). The bond distances Ru–N(Por) span a narrow range of 2.052(3)–2.055(2) Å (Table S9), which is close to bond lengths found in other ruthenium porphyrins<sup>7,8</sup>. The carbonyl ligand is coordinated in a linear fashion, the Ru–C(CO)–O(CO) angle being 180° for both complexes. Curiously, the Ru–C distance is 1.988(5) Å for **RuDTolP(CO)H<sub>2</sub>O** but only 1.830(5) Å for **RuDTolP(CO)Py**. The Ru–CO distance in the pyridine adduct is in fact close to that in Ru(TPP)(CO)(Py) (1.838 Å)<sup>7</sup>. In the aqua complex, the Ru–C bond is elongated due to mutual disorder of CO and H<sub>2</sub>O ligands over two positions with 0.64 and 0.36 occupancies, and is close to the distance found in Ru(TCPP)(CO)(AcPy) (1.982 Å)<sup>8</sup>. The Ru–N(py) distance is non-exceptional, being equal to 2.200(4) Å<sup>9,10</sup>. The deviation of Ru from the N<sub>4</sub> porphyrin plane is 0.032(1) Å for **RuDTolP(CO)H<sub>2</sub>O** and 0.069(2) Å for **RuDTolP(CO)Py**. The porphyrin macrocycles are almost flat, and the root mean square deviation (RMSD) from the mean plane of the 24-atom core of the porphyrin (N<sub>4</sub>C<sub>20</sub>) does not exceed 0.056 Å and 0.064 Å for aqua and pyridine complexes, respectively. A slight elongation along the 5,15-axis in both compounds can be observed, which

is a common motif in the 5,15-porphyrins<sup>11,12</sup>. The C<sub>5</sub>⋯C<sub>15</sub> distance is 6.949(6) Å vs. 6.811(6) Å for C<sub>10</sub>⋯C<sub>20</sub> in **RuDTolP(CO)H<sub>2</sub>O** and 6.951(7) Å vs. 6.794(8) Å in **RuDTolP(CO)Py**.

**Table S9.** Selected bond distances (Å) and angles (°) of **RuDTolP(CO)H<sub>2</sub>O** and **RuDTolP(CO)Py**

|                                                | <b>RuDTolP(CO)H<sub>2</sub>O</b> | <b>RuDTolP(CO)Py</b> |
|------------------------------------------------|----------------------------------|----------------------|
| Ru1–N1                                         | 2.053(2)                         | 2.052(3)             |
| Ru1–N2                                         | 2.055(2)                         | 2.052(3)             |
| Ru–C(CO)                                       | 1.988(5)                         | 1.830(5)             |
| C(CO)–O(CO)                                    | 1.077(5)                         | 1.157(7)             |
| Ru–N(Py)                                       | –                                | 2.200(4)             |
| Ru–O(H <sub>2</sub> O)                         | 2.090(4)                         | –                    |
| Ru deviation from N <sub>4</sub> plane         | 0.032(1)                         | 0.069(2)             |
| RMSD from N <sub>4</sub> C <sub>20</sub> plane | 0.056                            | 0.064                |

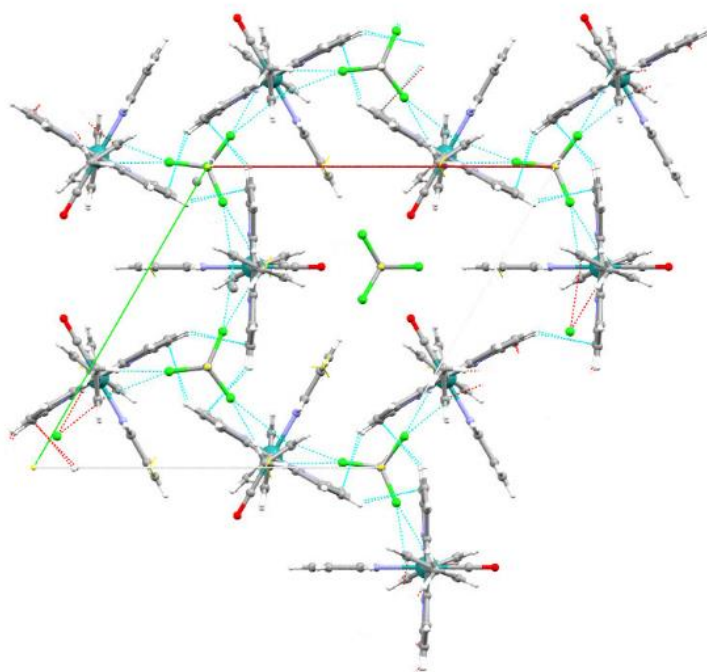

**Fig. S36** Crystal packing of **RuDTolP(CO)Py**, view along *c* direction. Blue dotted lines show C–H⋯ $\pi$  contacts between porphyrin molecules [C⋯C distances span 3.586–3.663 Å] and contacts with chloroform molecules.



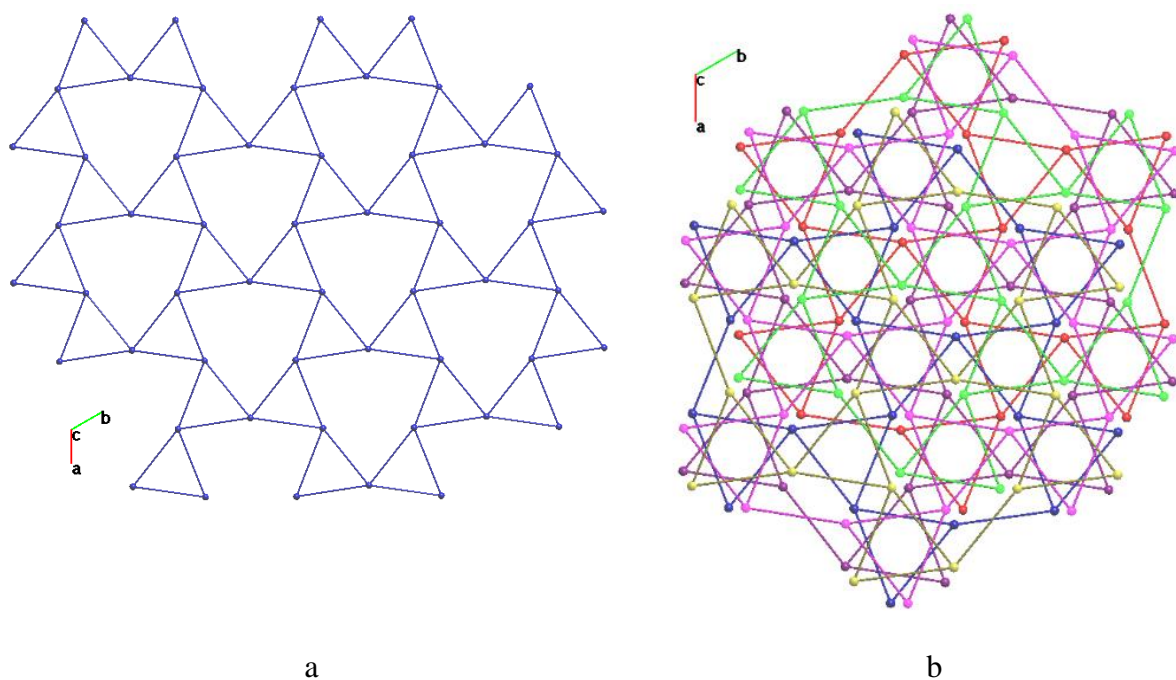

**Fig. S37** Crystal packing of **RuDTolP(CO)Py**, simplified using ToposPro,<sup>13</sup> each porphyrin is simplified to the dot in its center of mass, lines show the closest contacts between adjacent molecules. One layer in *ab* plane (*a*), seven layers in the unit cell, which are stacked with rotation (*b*), each layer is shown by different color.

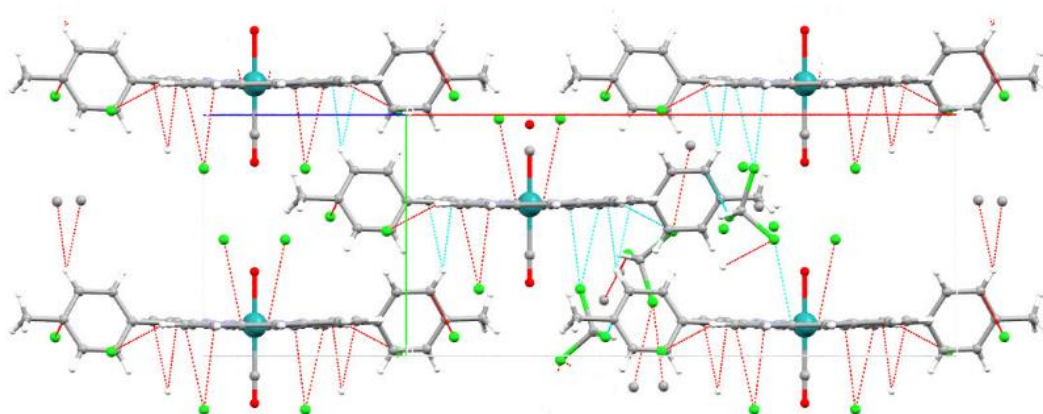

**Fig. S38** Crystal packing of **RuDTolP(CO)H<sub>2</sub>O**. Blue dotted lines show C–H··· $\pi$  contacts between tolyl substituent and porphyrin core of adjacent molecule [C···C distances span 3.558–3.802 Å].

**Table S10.** Crystal data and structure refinement for **CP<sub>6</sub>** and **CP<sub>6+2</sub>**.

| Identification code | <b>CP<sub>6</sub></b>                                                                                            | <b>CP<sub>6+2</sub></b>                                                                                                          |
|---------------------|------------------------------------------------------------------------------------------------------------------|----------------------------------------------------------------------------------------------------------------------------------|
| Empirical formula   | C <sub>246</sub> H <sub>168</sub> I <sub>8</sub> Mo <sub>6</sub> N <sub>30</sub> O <sub>18</sub> Ru <sub>6</sub> | C <sub>360</sub> H <sub>286</sub> D <sub>24</sub> I <sub>8</sub> Mo <sub>6</sub> N <sub>40</sub> O <sub>26</sub> Ru <sub>8</sub> |
| CCDC number         | 2173541                                                                                                          | 2173542                                                                                                                          |
| Formula weight      | 6029.35                                                                                                          | 8036.01                                                                                                                          |
| Temperature/K       | 100(2)                                                                                                           | 140(2)                                                                                                                           |
| Crystal system      | monoclinic                                                                                                       | triclinic                                                                                                                        |
| Space group         | C2/m                                                                                                             | P-1                                                                                                                              |
| a/Å                 | 27.408(6)                                                                                                        | 21.1183(7)                                                                                                                       |
| b/Å                 | 27.031(5)                                                                                                        | 22.5011(7)                                                                                                                       |
| c/Å                 | 22.388(5)                                                                                                        | 24.4219(8)                                                                                                                       |

|                                                |                                                                |                                                                |
|------------------------------------------------|----------------------------------------------------------------|----------------------------------------------------------------|
| $\alpha/^\circ$                                | 90                                                             | 110.2710(10)                                                   |
| $\beta/^\circ$                                 | 108.56(3)                                                      | 109.4890(10)                                                   |
| $\gamma/^\circ$                                | 90                                                             | 99.2040(10)                                                    |
| Volume/ $\text{\AA}^3$                         | 15723(6)                                                       | 9751.6(6)                                                      |
| Z                                              | 2                                                              | 1                                                              |
| $\rho_{\text{calc}}/\text{g/cm}^3$             | 1.274                                                          | 1.368                                                          |
| $\mu/\text{mm}^{-1}$                           | 1.519                                                          | 1.179                                                          |
| F(000)                                         | 5876.0                                                         | 3986.0                                                         |
| Crystal size/ $\text{mm}^3$                    | $0.1 \times 0.1 \times 0.03$                                   | $0.4 \times 0.3 \times 0.25$                                   |
| Radiation                                      | synchrotron ( $\lambda = 0.745$ )                              | MoK $\alpha$ ( $\lambda = 0.71073$ )                           |
| 2 $\Theta$ range for data collection/ $^\circ$ | 4.0 to 53.3                                                    | 2.456 to 50.7                                                  |
| Index ranges                                   | $-33 \leq h \leq 33, -32 \leq k \leq 32, -26 \leq l \leq 26$   | $-25 \leq h \leq 25, -27 \leq k \leq 27, -29 \leq l \leq 29$   |
| Reflections collected                          | 86656                                                          | 164344                                                         |
| Independent reflections                        | 14685 [ $R_{\text{int}} = 0.0639, R_{\text{sigma}} = 0.0411$ ] | 35665 [ $R_{\text{int}} = 0.0662, R_{\text{sigma}} = 0.0707$ ] |
| Data/restraints/parameters                     | 14685/16/712                                                   | 35665/130/2009                                                 |
| Goodness-of-fit on $F^2$                       | 1.038                                                          | 1.040                                                          |
| Final R indexes [ $I \geq 2\sigma(I)$ ]        | $R_1 = 0.0621, wR_2 = 0.1841$                                  | $R_1 = 0.0783, wR_2 = 0.2172$                                  |
| Final R indexes [all data]                     | $R_1 = 0.1078, wR_2 = 0.2160$                                  | $R_1 = 0.1387, wR_2 = 0.2802$                                  |
| Largest diff. peak/hole / $e \text{\AA}^{-3}$  | 1.19/-0.79                                                     | 2.73/-1.48                                                     |

**Table S11.** Bond lengths for **CP<sub>6</sub>**

| Atom | Atom             | Length/ $\text{\AA}$ |  | Atom | Atom             | Length/ $\text{\AA}$ |
|------|------------------|----------------------|--|------|------------------|----------------------|
| I2   | Mo2              | 2.7491(13)           |  | C8   | C7               | 1.508(18)            |
| I2   | Mo1              | 2.7526(10)           |  | C64  | C63              | 1.354(14)            |
| I2   | Mo1 <sup>1</sup> | 2.7526(10)           |  | C64  | C63 <sup>1</sup> | 1.353(14)            |
| I3   | Mo2              | 2.7978(13)           |  | C26  | C25              | 1.504(17)            |
| I3   | Mo1 <sup>2</sup> | 2.7903(12)           |  | C26  | C27              | 1.343(18)            |
| I3   | Mo1 <sup>3</sup> | 2.7903(13)           |  | C35  | C36              | 1.3900               |
| I1   | Mo2              | 2.7777(10)           |  | C35  | C41              | 1.3900               |
| I1   | Mo1 <sup>3</sup> | 2.8087(11)           |  | C35  | C34              | 1.485(10)            |
| I1   | Mo1              | 2.7918(12)           |  | C36  | C37              | 1.3900               |
| Mo2  | Mo1              | 2.6638(13)           |  | C37  | C38              | 1.3900               |
| Mo2  | Mo1 <sup>3</sup> | 2.6582(11)           |  | C38  | C40              | 1.3900               |
| Mo2  | Mo1 <sup>2</sup> | 2.6582(11)           |  | C38  | C39              | 1.590(14)            |
| Mo2  | Mo1 <sup>1</sup> | 2.6638(13)           |  | C40  | C41              | 1.3900               |
| Mo2  | O3               | 2.097(7)             |  | C10  | C9               | 1.379(14)            |
| Ru1  | N5               | 2.061(7)             |  | C61  | C62              | 1.397(16)            |
| Ru1  | N6               | 2.032(8)             |  | C61  | C60              | 1.460(16)            |
| Ru1  | N1               | 2.168(8)             |  | C6   | C5               | 1.414(15)            |
| Ru1  | N4               | 2.044(8)             |  | C25  | C17              | 1.360(16)            |
| Ru1  | N3               | 2.054(9)             |  | C17  | C16              | 1.403(16)            |
| Ru1  | C00Q             | 1.810(14)            |  | C17  | C18              | 1.537(15)            |

| Table S11. Bond lengths for CP <sub>6</sub> |                  |            |  |      |                 |           |
|---------------------------------------------|------------------|------------|--|------|-----------------|-----------|
| Atom                                        | Atom             | Length/Å   |  | Atom | Atom            | Length/Å  |
| Mo1                                         | Mo1 <sup>3</sup> | 2.6601(14) |  | C45  | C46             | 1.365(14) |
| Mo1                                         | Mo1 <sup>1</sup> | 2.643(2)   |  | C45  | C44             | 1.438(15) |
| Mo1                                         | O1               | 2.116(7)   |  | C63  | C62             | 1.480(18) |
| Ru2                                         | N8               | 2.007(14)  |  | C4   | C3              | 1.410(15) |
| Ru2                                         | N8 <sup>1</sup>  | 2.007(14)  |  | C27  | C28             | 1.486(15) |
| Ru2                                         | N2               | 2.166(10)  |  | C34  | C42             | 1.377(12) |
| Ru2                                         | N7 <sup>1</sup>  | 2.105(13)  |  | C34  | C33             | 1.411(14) |
| Ru2                                         | N7               | 2.105(13)  |  | C43  | C42             | 1.462(14) |
| Ru2                                         | C01R             | 1.829(14)  |  | C43  | C44             | 1.402(15) |
| O3                                          | C7               | 1.194(14)  |  | C29  | C28             | 1.369(15) |
| O6                                          | C01R             | 1.170(14)  |  | C48  | C49             | 1.45(2)   |
| N8                                          | C63              | 1.381(13)  |  | C52  | C60             | 1.416(18) |
| N8                                          | C60              | 1.484(19)  |  | C52  | C51             | 1.363(19) |
| O1                                          | C1               | 1.190(14)  |  | C52  | C53             | 1.480(18) |
| C47                                         | C48              | 1.492(19)  |  | C46  | C13             | 1.402(17) |
| C47                                         | C48 <sup>1</sup> | 1.492(19)  |  | C33  | C32             | 1.455(14) |
| O5                                          | C00Q             | 1.172(13)  |  | C16  | C15             | 1.468(17) |
| N5                                          | C30              | 1.400(13)  |  | C23  | C21             | 1.37(2)   |
| N5                                          | C33              | 1.372(12)  |  | C23  | C24             | 1.364(18) |
| O2                                          | C1               | 1.277(14)  |  | C50  | C49             | 1.31(2)   |
| N6                                          | C45              | 1.377(12)  |  | C50  | C51             | 1.417(18) |
| N6                                          | C42              | 1.382(11)  |  | C18  | C19             | 1.363(18) |
| N1                                          | C4               | 1.353(13)  |  | C18  | C24             | 1.38(2)   |
| N1                                          | C5               | 1.372(12)  |  | C13  | C14             | 1.464(17) |
| C30                                         | C29              | 1.377(14)  |  | C32  | C31             | 1.368(15) |
| C30                                         | C31              | 1.429(14)  |  | C12  | C11             | 1.398(17) |
| N2                                          | C10              | 1.313(13)  |  | C21  | C20             | 1.38(2)   |
| N2                                          | C11              | 1.322(15)  |  | C21  | C22             | 1.594(19) |
| N7                                          | C48              | 1.386(15)  |  | C20  | C19             | 1.436(16) |
| N7                                          | C51              | 1.423(19)  |  | C57  | C56             | 1.56(2)   |
| N4                                          | C25              | 1.418(12)  |  | C7   | O4 <sup>1</sup> | 1.435(17) |
| N4                                          | C28              | 1.388(13)  |  | C7   | O4              | 1.435(17) |
| C2                                          | C1               | 1.487(15)  |  | C15  | C14             | 1.348(19) |
| C2                                          | C6               | 1.368(14)  |  | C53  | C59             | 1.3900    |
| C2                                          | C3               | 1.404(13)  |  | C53  | C54             | 1.3900    |
| N3                                          | C16              | 1.399(13)  |  | C59  | C58             | 1.3900    |
| N3                                          | C13              | 1.368(16)  |  | C58  | C56             | 1.3900    |
| C8                                          | C9               | 1.355(16)  |  | C56  | C55             | 1.3900    |
| C8                                          | C12              | 1.403(15)  |  | C55  | C54             | 1.3900    |

<sup>1</sup>+X,1-Y,+Z; <sup>2</sup>1-X,1-Y,1-Z; <sup>3</sup>1-X,+Y,1-Z

| Table S12. Bond angles for CP <sub>6</sub> |      |                  |            |  |                  |      |      |           |
|--------------------------------------------|------|------------------|------------|--|------------------|------|------|-----------|
| Atom                                       | Atom | Atom             | Angle/°    |  | Atom             | Atom | Atom | Angle/°   |
| Mo2                                        | I2   | Mo1              | 57.92(3)   |  | C29              | C30  | N5   | 123.9(10) |
| Mo2                                        | I2   | Mo1 <sup>1</sup> | 57.92(3)   |  | C29              | C30  | C31  | 126.5(11) |
| Mo1                                        | I2   | Mo1 <sup>1</sup> | 57.39(4)   |  | C10              | N2   | Ru2  | 122.1(8)  |
| Mo1 <sup>2</sup>                           | I3   | Mo2              | 56.81(3)   |  | C10              | N2   | C11  | 117.6(10) |
| Mo1 <sup>3</sup>                           | I3   | Mo2              | 56.81(3)   |  | C11              | N2   | Ru2  | 120.2(7)  |
| Mo1 <sup>2</sup>                           | I3   | Mo1 <sup>3</sup> | 56.54(4)   |  | C48              | N7   | Ru2  | 125.5(15) |
| Mo2                                        | I1   | Mo1 <sup>2</sup> | 56.82(3)   |  | C48              | N7   | C51  | 105.3(15) |
| Mo2                                        | I1   | Mo1              | 57.15(3)   |  | C51              | N7   | Ru2  | 129.1(9)  |
| Mo1                                        | I1   | Mo1 <sup>2</sup> | 56.72(3)   |  | C25              | N4   | Ru1  | 126.2(7)  |
| I2                                         | Mo2  | I3               | 176.91(4)  |  | C28              | N4   | Ru1  | 126.0(7)  |
| I2                                         | Mo2  | I1               | 89.47(2)   |  | C28              | N4   | C25  | 107.8(9)  |
| I2                                         | Mo2  | I1 <sup>1</sup>  | 89.47(2)   |  | C6               | C2   | C1   | 117.2(10) |
| I1                                         | Mo2  | I3               | 90.42(2)   |  | C6               | C2   | C3   | 120.4(11) |
| I1 <sup>1</sup>                            | Mo2  | I3               | 90.42(2)   |  | C3               | C2   | C1   | 122.3(11) |
| I1                                         | Mo2  | I1 <sup>1</sup>  | 175.71(4)  |  | C16              | N3   | Ru1  | 127.9(8)  |
| Mo1 <sup>2</sup>                           | Mo2  | I2               | 121.08(4)  |  | C13              | N3   | Ru1  | 125.3(7)  |
| Mo1                                        | Mo2  | I2               | 61.11(3)   |  | C13              | N3   | C16  | 106.8(9)  |
| Mo1 <sup>3</sup>                           | Mo2  | I2               | 121.08(4)  |  | C9               | C8   | C12  | 117.0(10) |
| Mo1 <sup>1</sup>                           | Mo2  | I2               | 61.11(3)   |  | C9               | C8   | C7   | 123.2(10) |
| Mo1 <sup>3</sup>                           | Mo2  | I3               | 61.45(3)   |  | C12              | C8   | C7   | 119.8(12) |
| Mo1 <sup>1</sup>                           | Mo2  | I3               | 121.42(4)  |  | C63 <sup>1</sup> | C64  | C63  | 126(2)    |
| Mo1                                        | Mo2  | I3               | 121.42(4)  |  | O5               | C00Q | Ru1  | 178.8(11) |
| Mo1 <sup>2</sup>                           | Mo2  | I3               | 61.45(3)   |  | C27              | C26  | C25  | 107.4(12) |
| Mo1 <sup>3</sup>                           | Mo2  | I1 <sup>1</sup>  | 62.18(3)   |  | C36              | C35  | C41  | 120.0     |
| Mo1                                        | Mo2  | I1               | 61.69(3)   |  | C36              | C35  | C34  | 116.8(7)  |
| Mo1 <sup>2</sup>                           | Mo2  | I1 <sup>1</sup>  | 121.80(3)  |  | C41              | C35  | C34  | 123.1(7)  |
| Mo1 <sup>1</sup>                           | Mo2  | I1 <sup>1</sup>  | 61.70(3)   |  | C37              | C36  | C35  | 120.0     |
| Mo1 <sup>2</sup>                           | Mo2  | I1               | 62.18(3)   |  | C36              | C37  | C38  | 120.0     |
| Mo1 <sup>1</sup>                           | Mo2  | I1               | 121.16(4)  |  | C37              | C38  | C40  | 120.0     |
| Mo1 <sup>3</sup>                           | Mo2  | I1               | 121.80(3)  |  | C37              | C38  | C39  | 124.3(11) |
| Mo1                                        | Mo2  | I1 <sup>1</sup>  | 121.16(4)  |  | C40              | C38  | C39  | 115.6(11) |
| Mo1 <sup>3</sup>                           | Mo2  | Mo1 <sup>1</sup> | 59.98(3)   |  | C41              | C40  | C38  | 120.0     |
| Mo1 <sup>3</sup>                           | Mo2  | Mo1              | 89.60(4)   |  | C40              | C41  | C35  | 120.0     |
| Mo1                                        | Mo2  | Mo1 <sup>1</sup> | 59.49(5)   |  | N2               | C10  | C9   | 122.9(11) |
| Mo1 <sup>2</sup>                           | Mo2  | Mo1 <sup>1</sup> | 89.60(4)   |  | C62              | C61  | C60  | 106.0(14) |
| Mo1 <sup>2</sup>                           | Mo2  | Mo1              | 59.98(3)   |  | O1               | C1   | O2   | 129.1(13) |
| Mo1 <sup>2</sup>                           | Mo2  | Mo1 <sup>3</sup> | 59.63(4)   |  | O1               | C1   | C2   | 116.1(12) |
| O3                                         | Mo2  | I2               | 91.7(2)    |  | O2               | C1   | C2   | 114.0(12) |
| O3                                         | Mo2  | I3               | 85.2(2)    |  | C2               | C6   | C5   | 118.6(10) |
| O3                                         | Mo2  | I1               | 87.94(2)   |  | C8               | C9   | C10  | 121.0(10) |
| O3                                         | Mo2  | I1 <sup>1</sup>  | 87.94(2)   |  | N4               | C25  | C26  | 107.4(11) |
| O3                                         | Mo2  | Mo1 <sup>1</sup> | 137.35(14) |  | C17              | C25  | N4   | 126.2(11) |
| O3                                         | Mo2  | Mo1 <sup>3</sup> | 132.98(15) |  | C17              | C25  | C26  | 126.3(12) |

| Table S12. Bond angles for CP <sub>6</sub> |      |                  |            |  |      |      |      |           |
|--------------------------------------------|------|------------------|------------|--|------|------|------|-----------|
| Atom                                       | Atom | Atom             | Angle/°    |  | Atom | Atom | Atom | Angle/°   |
| O3                                         | Mo2  | Mo1 <sup>2</sup> | 132.98(15) |  | C25  | C17  | C16  | 126.6(11) |
| O3                                         | Mo2  | Mo1              | 137.34(14) |  | C25  | C17  | C18  | 117.3(12) |
| N5                                         | Ru1  | N1               | 87.5(3)    |  | C16  | C17  | C18  | 116.0(11) |
| N6                                         | Ru1  | N5               | 88.4(3)    |  | N6   | C45  | C44  | 110.7(9)  |
| N6                                         | Ru1  | N1               | 86.2(3)    |  | C46  | C45  | N6   | 126.7(10) |
| N6                                         | Ru1  | N4               | 173.7(3)   |  | C46  | C45  | C44  | 122.5(11) |
| N6                                         | Ru1  | N3               | 91.0(4)    |  | N8   | C63  | C62  | 109.3(14) |
| N4                                         | Ru1  | N5               | 91.0(3)    |  | C64  | C63  | N8   | 124.8(19) |
| N4                                         | Ru1  | N1               | 87.5(3)    |  | C64  | C63  | C62  | 125.3(13) |
| N4                                         | Ru1  | N3               | 89.2(4)    |  | N1   | C4   | C3   | 125.2(10) |
| N3                                         | Ru1  | N5               | 175.8(4)   |  | C26  | C27  | C28  | 108.6(12) |
| N3                                         | Ru1  | N1               | 88.3(4)    |  | C42  | C34  | C35  | 118.3(9)  |
| C00Q                                       | Ru1  | N5               | 93.0(4)    |  | C42  | C34  | C33  | 123.5(9)  |
| C00Q                                       | Ru1  | N6               | 92.3(4)    |  | C33  | C34  | C35  | 118.2(9)  |
| C00Q                                       | Ru1  | N1               | 178.4(4)   |  | C44  | C43  | C42  | 107.6(10) |
| C00Q                                       | Ru1  | N4               | 94.0(4)    |  | C28  | C29  | C30  | 129.7(11) |
| C00Q                                       | Ru1  | N3               | 91.2(4)    |  | N6   | C42  | C43  | 108.1(8)  |
| I2                                         | Mo1  | I3 <sup>3</sup>  | 90.20(3)   |  | C34  | C42  | N6   | 127.6(9)  |
| I2                                         | Mo1  | I1               | 89.10(3)   |  | C34  | C42  | C43  | 124.0(10) |
| I2                                         | Mo1  | I1 <sup>2</sup>  | 177.12(4)  |  | N7   | C48  | C47  | 120(2)    |
| I3 <sup>3</sup>                            | Mo1  | I1               | 175.72(4)  |  | N7   | C48  | C49  | 112.0(18) |
| I3 <sup>3</sup>                            | Mo1  | I1 <sup>2</sup>  | 89.94(3)   |  | C49  | C48  | C47  | 127.1(13) |
| I1                                         | Mo1  | I1 <sup>2</sup>  | 90.55(4)   |  | C61  | C62  | C63  | 109.3(11) |
| Mo2 <sup>3</sup>                           | Mo1  | I2               | 121.48(4)  |  | C60  | C52  | C53  | 119.8(13) |
| Mo2                                        | Mo1  | I2               | 60.97(3)   |  | C51  | C52  | C60  | 124.5(18) |
| Mo2 <sup>3</sup>                           | Mo1  | I3 <sup>3</sup>  | 61.73(3)   |  | C51  | C52  | C53  | 115.6(14) |
| Mo2                                        | Mo1  | I3 <sup>3</sup>  | 121.96(4)  |  | N1   | C5   | C6   | 123.4(10) |
| Mo2                                        | Mo1  | I1               | 61.16(3)   |  | C45  | C46  | C13  | 126.5(11) |
| Mo2 <sup>3</sup>                           | Mo1  | I1               | 122.07(3)  |  | C43  | C44  | C45  | 105.6(11) |
| Mo2 <sup>3</sup>                           | Mo1  | I1 <sup>2</sup>  | 61.00(3)   |  | N5   | C33  | C34  | 125.4(9)  |
| Mo2                                        | Mo1  | I1 <sup>2</sup>  | 121.22(3)  |  | N5   | C33  | C32  | 108.7(10) |
| Mo2 <sup>3</sup>                           | Mo1  | Mo2              | 90.40(4)   |  | C34  | C33  | C32  | 125.8(10) |
| Mo2 <sup>3</sup>                           | Mo1  | Mo1 <sup>2</sup> | 60.12(3)   |  | N3   | C16  | C17  | 123.8(11) |
| Mo1 <sup>2</sup>                           | Mo1  | I2               | 120.87(4)  |  | N3   | C16  | C15  | 108.8(11) |
| Mo1 <sup>1</sup>                           | Mo1  | I2               | 61.31(2)   |  | C17  | C16  | C15  | 127.3(11) |
| Mo1 <sup>2</sup>                           | Mo1  | I3 <sup>3</sup>  | 121.84(4)  |  | C24  | C23  | C21  | 126(2)    |
| Mo1 <sup>1</sup>                           | Mo1  | I3 <sup>3</sup>  | 61.73(2)   |  | C49  | C50  | C51  | 115(2)    |
| Mo1 <sup>2</sup>                           | Mo1  | I1               | 61.96(3)   |  | C19  | C18  | C17  | 121.4(14) |
| Mo1 <sup>2</sup>                           | Mo1  | I1 <sup>2</sup>  | 61.32(3)   |  | C19  | C18  | C24  | 120.9(12) |
| Mo1 <sup>1</sup>                           | Mo1  | I1               | 121.39(3)  |  | C24  | C18  | C17  | 117.6(14) |
| Mo1 <sup>1</sup>                           | Mo1  | I1 <sup>2</sup>  | 121.18(3)  |  | N3   | C13  | C46  | 125.4(10) |
| Mo1 <sup>1</sup>                           | Mo1  | Mo2              | 60.25(2)   |  | N3   | C13  | C14  | 109.5(12) |
| Mo1 <sup>1</sup>                           | Mo1  | Mo2 <sup>3</sup> | 60.18(2)   |  | C46  | C13  | C14  | 125.1(14) |

| Table S12. Bond angles for CP <sub>6</sub> |      |                  |            |  |                 |      |                 |           |
|--------------------------------------------|------|------------------|------------|--|-----------------|------|-----------------|-----------|
| Atom                                       | Atom | Atom             | Angle/°    |  | Atom            | Atom | Atom            | Angle/°   |
| Mo1 <sup>2</sup>                           | Mo1  | Mo2              | 59.91(3)   |  | C2              | C3   | C4              | 116.7(11) |
| Mo1 <sup>1</sup>                           | Mo1  | Mo1 <sup>2</sup> | 89.998(1)  |  | C31             | C32  | C33             | 107.2(10) |
| O1                                         | Mo1  | I2               | 92.57(18)  |  | O6              | C01R | Ru2             | 177.4(12) |
| O1                                         | Mo1  | I3 <sup>3</sup>  | 88.33(18)  |  | C11             | C12  | C8              | 117.9(12) |
| O1                                         | Mo1  | I1 <sup>2</sup>  | 84.55(18)  |  | C23             | C21  | C20             | 116.7(15) |
| O1                                         | Mo1  | I1               | 87.48(18)  |  | C23             | C21  | C22             | 118.6(19) |
| O1                                         | Mo1  | Mo2              | 137.17(17) |  | C20             | C21  | C22             | 124.1(17) |
| O1                                         | Mo1  | Mo2 <sup>3</sup> | 132.25(17) |  | C21             | C20  | C19             | 118.9(15) |
| O1                                         | Mo1  | Mo1 <sup>2</sup> | 131.83(18) |  | N4              | C28  | C27             | 108.5(10) |
| O1                                         | Mo1  | Mo1 <sup>1</sup> | 138.07(18) |  | C29             | C28  | N4              | 124.0(10) |
| N8                                         | Ru2  | N8 <sup>1</sup>  | 88.1(8)    |  | C29             | C28  | C27             | 127.4(12) |
| N8 <sup>1</sup>                            | Ru2  | N2               | 87.2(3)    |  | C50             | C49  | C48             | 102.2(12) |
| N8                                         | Ru2  | N2               | 87.2(3)    |  | C18             | C19  | C20             | 120.4(15) |
| N8                                         | Ru2  | N7               | 88.5(5)    |  | C32             | C31  | C30             | 107.9(10) |
| N8 <sup>1</sup>                            | Ru2  | N7 <sup>1</sup>  | 88.5(5)    |  | N2              | C11  | C12             | 123.6(10) |
| N8                                         | Ru2  | N7 <sup>1</sup>  | 173.6(4)   |  | O3              | C7   | C8              | 114.0(13) |
| N8 <sup>1</sup>                            | Ru2  | N7               | 173.6(4)   |  | O3              | C7   | O4 <sup>1</sup> | 117.1(10) |
| N7 <sup>1</sup>                            | Ru2  | N2               | 87.2(3)    |  | O3              | C7   | O4              | 117.1(10) |
| N7                                         | Ru2  | N2               | 87.2(3)    |  | O4              | C7   | C8              | 112.5(9)  |
| N7 <sup>1</sup>                            | Ru2  | N7               | 94.4(8)    |  | O4 <sup>1</sup> | C7   | C8              | 112.5(9)  |
| C01R                                       | Ru2  | N8               | 92.1(4)    |  | O4              | C7   | O4 <sup>1</sup> | 79.3(17)  |
| C01R                                       | Ru2  | N8 <sup>1</sup>  | 92.1(4)    |  | C61             | C60  | N8              | 109.1(12) |
| C01R                                       | Ru2  | N2               | 178.9(5)   |  | C52             | C60  | N8              | 127.1(13) |
| C01R                                       | Ru2  | N7               | 93.5(4)    |  | C52             | C60  | C61             | 123.6(17) |
| C01R                                       | Ru2  | N7 <sup>1</sup>  | 93.5(4)    |  | C52             | C51  | N7              | 124.4(16) |
| C7                                         | O3   | Mo2              | 137.1(9)   |  | C52             | C51  | C50             | 131(2)    |
| C63                                        | N8   | Ru2              | 127.6(14)  |  | C50             | C51  | N7              | 104.9(15) |
| C63                                        | N8   | C60              | 106.0(14)  |  | C23             | C24  | C18             | 116.5(17) |
| C60                                        | N8   | Ru2              | 126.2(7)   |  | C14             | C15  | C16             | 107.0(12) |
| C1                                         | O1   | Mo1              | 134.6(9)   |  | C15             | C14  | C13             | 107.7(14) |
| C48 <sup>1</sup>                           | C47  | C48              | 133.7(19)  |  | C59             | C53  | C52             | 119.1(9)  |
| C30                                        | N5   | Ru1              | 124.5(7)   |  | C59             | C53  | C54             | 120.0     |
| C33                                        | N5   | Ru1              | 127.8(7)   |  | C54             | C53  | C52             | 120.9(9)  |
| C33                                        | N5   | C30              | 107.5(8)   |  | C58             | C59  | C53             | 120.0     |
| C45                                        | N6   | Ru1              | 125.1(7)   |  | C59             | C58  | C56             | 120.0     |
| C45                                        | N6   | C42              | 107.9(8)   |  | C58             | C56  | C57             | 124.2(12) |
| C42                                        | N6   | Ru1              | 126.9(7)   |  | C58             | C56  | C55             | 120.0     |
| C4                                         | N1   | Ru1              | 121.9(7)   |  | C55             | C56  | C57             | 115.7(12) |
| C4                                         | N1   | C5               | 115.4(10)  |  | C56             | C55  | C54             | 120.0     |
| C5                                         | N1   | Ru1              | 122.1(8)   |  | C55             | C54  | C53             | 120.0     |
| N5                                         | C30  | C31              | 108.6(10)  |  |                 |      |                 |           |

<sup>1</sup>+X,1-Y,+Z; <sup>2</sup>1-X,+Y,1-Z; <sup>3</sup>1-X,1-Y,1-Z

| <b>Table S13.</b> Bond lengths for CP <sub>6+2</sub> |                  |                 |  |             |             |                 |
|------------------------------------------------------|------------------|-----------------|--|-------------|-------------|-----------------|
| <b>Atom</b>                                          | <b>Atom</b>      | <b>Length/Å</b> |  | <b>Atom</b> | <b>Atom</b> | <b>Length/Å</b> |
| I1                                                   | Mo1              | 2.7811(12)      |  | C222        | C223        | 1.33(3)         |
| I1                                                   | Mo2              | 2.7919(11)      |  | C223        | C224        | 1.42(2)         |
| I1                                                   | Mo3              | 2.7838(12)      |  | C224        | C225        | 1.29(3)         |
| I2                                                   | Mo1              | 2.7643(11)      |  | C225        | C226        | 1.55(3)         |
| I2                                                   | Mo2              | 2.7441(10)      |  | C226        | C227        | 1.30(3)         |
| I2                                                   | Mo3 <sup>1</sup> | 2.7697(12)      |  | C227        | C228        | 1.52(2)         |
| I3                                                   | Mo1 <sup>1</sup> | 2.8031(11)      |  | C228        | C229        | 1.34(3)         |
| I3                                                   | Mo2              | 2.7898(11)      |  | C228        | C234        | 1.31(3)         |
| I3                                                   | Mo3 <sup>1</sup> | 2.8042(10)      |  | C229        | C230        | 1.40(3)         |
| I4                                                   | Mo1              | 2.7626(12)      |  | C230        | C231        | 1.34(4)         |
| I4                                                   | Mo2 <sup>1</sup> | 2.7734(10)      |  | C231        | C232        | 1.59(3)         |
| I4                                                   | Mo3 <sup>1</sup> | 2.7782(10)      |  | C231        | C233        | 1.38(4)         |
| Ru11                                                 | N11              | 2.187(8)        |  | C233        | C234        | 1.39(3)         |
| Ru11                                                 | N12              | 2.048(10)       |  | C301        | C302        | 1.43(3)         |
| Ru11                                                 | N13              | 2.046(9)        |  | C301        | C327        | 1.42(3)         |
| Ru11                                                 | N14              | 2.035(9)        |  | C302        | C303        | 1.29(3)         |
| Ru11                                                 | N15              | 2.049(9)        |  | C303        | C304        | 1.42(2)         |
| Ru11                                                 | C11              | 1.814(12)       |  | C304        | C305        | 1.41(2)         |
| Ru21                                                 | N21              | 2.158(11)       |  | C305        | C306        | 1.408(18)       |
| Ru21                                                 | N22              | 2.045(14)       |  | C306        | C307        | 1.408(19)       |
| Ru21                                                 | N23              | 2.055(10)       |  | C307        | C308        | 1.318(18)       |
| Ru21                                                 | N24              | 2.020(12)       |  | C308        | C309        | 1.429(19)       |
| Ru21                                                 | N25              | 2.061(12)       |  | C309        | C310        | 1.397(18)       |
| Ru21                                                 | C21              | 1.830(15)       |  | C310        | C311        | 1.514(15)       |
| Ru31                                                 | N31              | 2.167(9)        |  | C310        | C318        | 1.379(17)       |
| Ru31                                                 | N32              | 2.046(14)       |  | C311        | C312        | 1.372(16)       |
| Ru31                                                 | N33              | 2.065(11)       |  | C311        | C317        | 1.388(16)       |
| Ru31                                                 | N34              | 2.046(11)       |  | C312        | C313        | 1.380(16)       |
| Ru31                                                 | N35              | 2.065(13)       |  | C313        | C314        | 1.381(17)       |
| Ru31                                                 | C31              | 1.818(13)       |  | C314        | C315        | 1.516(16)       |
| Mo1                                                  | Mo2              | 2.6712(11)      |  | C314        | C316        | 1.353(17)       |
| Mo1                                                  | Mo2 <sup>1</sup> | 2.6777(13)      |  | C316        | C317        | 1.388(16)       |
| Mo1                                                  | Mo3              | 2.6685(11)      |  | C318        | C319        | 1.467(18)       |
| Mo1                                                  | Mo3 <sup>1</sup> | 2.6587(11)      |  | C319        | C320        | 1.337(18)       |
| Mo1                                                  | O11              | 2.111(7)        |  | C320        | C321        | 1.45(2)         |
| Mo2                                                  | Mo3 <sup>1</sup> | 2.6732(13)      |  | C321        | C322        | 1.401(18)       |
| Mo2                                                  | Mo3              | 2.6634(12)      |  | C322        | C323        | 1.40(2)         |
| Mo2                                                  | O21              | 2.120(8)        |  | C323        | C324        | 1.47(2)         |
| Mo3                                                  | O31              | 2.103(7)        |  | C324        | C325        | 1.34(3)         |
| O11                                                  | C20              | 1.262(12)       |  | C325        | C326        | 1.41(3)         |
| O12                                                  | C20              | 1.228(13)       |  | C326        | C327        | 1.39(3)         |
| O13                                                  | C11              | 1.179(14)       |  | C327        | C328        | 1.509(19)       |
| O21                                                  | C27              | 1.274(16)       |  | C328        | C329        | 1.40(3)         |

| <b>Table S13.</b> Bond lengths for CP <sub>6+2</sub> |             |                 |  |             |             |                 |
|------------------------------------------------------|-------------|-----------------|--|-------------|-------------|-----------------|
| <b>Atom</b>                                          | <b>Atom</b> | <b>Length/Å</b> |  | <b>Atom</b> | <b>Atom</b> | <b>Length/Å</b> |
| O22                                                  | C27         | 1.221(17)       |  | C328        | C334        | 1.36(3)         |
| O23                                                  | C21         | 1.141(15)       |  | C329        | C330        | 1.39(2)         |
| O31                                                  | C37         | 1.254(12)       |  | C330        | C331        | 1.42(5)         |
| O32                                                  | C37         | 1.255(12)       |  | C331        | C332        | 1.52(2)         |
| O33                                                  | C31         | 1.167(14)       |  | C331        | C333        | 1.43(5)         |
| N11                                                  | C13         | 1.342(13)       |  | C333        | C334        | 1.46(2)         |
| N11                                                  | C14         | 1.333(13)       |  | Ru41        | O41         | 2.199(8)        |
| N12                                                  | C101        | 1.406(15)       |  | Ru41        | N41         | 2.074(10)       |
| N12                                                  | C104        | 1.374(15)       |  | Ru41        | N42         | 2.057(10)       |
| N13                                                  | C106        | 1.375(14)       |  | Ru41        | N43         | 2.051(9)        |
| N13                                                  | C109        | 1.375(14)       |  | Ru41        | N44         | 2.034(10)       |
| N14                                                  | C118        | 1.395(13)       |  | Ru41        | C41         | 1.785(13)       |
| N14                                                  | C121        | 1.387(13)       |  | O42         | C41         | 1.174(14)       |
| N15                                                  | C123        | 1.386(15)       |  | N41         | C401        | 1.355(16)       |
| N15                                                  | C126        | 1.390(15)       |  | N41         | C404        | 1.366(17)       |
| N21                                                  | C23         | 1.346(18)       |  | N42         | C406        | 1.371(15)       |
| N21                                                  | C24         | 1.355(16)       |  | N42         | C409        | 1.372(14)       |
| N22                                                  | C201        | 1.403(19)       |  | N43         | C418        | 1.378(14)       |
| N22                                                  | C204        | 1.31(2)         |  | N43         | C421        | 1.371(14)       |
| N23                                                  | C206        | 1.363(17)       |  | N44         | C423        | 1.364(15)       |
| N23                                                  | C209        | 1.400(15)       |  | N44         | C426        | 1.394(15)       |
| N24                                                  | C218        | 1.404(15)       |  | C401        | C402        | 1.433(19)       |
| N24                                                  | C221        | 1.395(17)       |  | C401        | C427        | 1.407(19)       |
| N25                                                  | C223        | 1.37(2)         |  | C402        | C403        | 1.33(2)         |
| N25                                                  | C226        | 1.39(2)         |  | C403        | C404        | 1.431(18)       |
| N31                                                  | C33         | 1.331(14)       |  | C404        | C405        | 1.37(2)         |
| N31                                                  | C34         | 1.350(14)       |  | C405        | C406        | 1.398(18)       |
| N32                                                  | C301        | 1.397(18)       |  | C406        | C407        | 1.434(19)       |
| N32                                                  | C304        | 1.34(2)         |  | C407        | C408        | 1.356(19)       |
| N33                                                  | C306        | 1.375(18)       |  | C408        | C409        | 1.443(17)       |
| N33                                                  | C309        | 1.380(14)       |  | C409        | C410        | 1.406(16)       |
| N34                                                  | C318        | 1.382(14)       |  | C410        | C411        | 1.494(16)       |
| N34                                                  | C321        | 1.371(16)       |  | C410        | C418        | 1.400(15)       |
| N35                                                  | C323        | 1.34(2)         |  | C411        | C412        | 1.420(16)       |
| N35                                                  | C326        | 1.360(18)       |  | C411        | C417        | 1.380(17)       |
| C12                                                  | C13         | 1.376(13)       |  | C412        | C413        | 1.385(17)       |
| C12                                                  | C16         | 1.388(14)       |  | C413        | C414        | 1.377(19)       |
| C14                                                  | C15         | 1.370(14)       |  | C414        | C415        | 1.510(17)       |
| C15                                                  | C16         | 1.387(14)       |  | C414        | C416        | 1.397(19)       |
| C16                                                  | C20         | 1.525(13)       |  | C416        | C417        | 1.383(17)       |
| C22                                                  | C23         | 1.39(2)         |  | C418        | C419        | 1.433(15)       |
| C22                                                  | C26         | 1.41(2)         |  | C419        | C420        | 1.343(15)       |
| C24                                                  | C25         | 1.380(18)       |  | C420        | C421        | 1.459(15)       |



| <b>Table S13.</b> Bond lengths for CP <sub>6+2</sub> |             |                 |  |             |             |                 |
|------------------------------------------------------|-------------|-----------------|--|-------------|-------------|-----------------|
| <b>Atom</b>                                          | <b>Atom</b> | <b>Length/Å</b> |  | <b>Atom</b> | <b>Atom</b> | <b>Length/Å</b> |
| C25                                                  | C26         | 1.325(17)       |  | C421        | C422        | 1.389(16)       |
| C26                                                  | C27         | 1.520(19)       |  | C422        | C423        | 1.415(16)       |
| C32                                                  | C33         | 1.364(16)       |  | C423        | C424        | 1.459(16)       |
| C32                                                  | C36         | 1.384(14)       |  | C424        | C425        | 1.354(19)       |
| C34                                                  | C35         | 1.354(15)       |  | C425        | C426        | 1.393(18)       |
| C35                                                  | C36         | 1.388(14)       |  | C426        | C427        | 1.396(18)       |
| C36                                                  | C37         | 1.481(14)       |  | C427        | C428        | 1.509(18)       |
| C101                                                 | C102        | 1.441(19)       |  | C428        | C429        | 1.340(17)       |
| C101                                                 | C127        | 1.343(18)       |  | C428        | C434        | 1.34(2)         |
| C102                                                 | C103        | 1.364(19)       |  | C429        | C430        | 1.420(19)       |
| C103                                                 | C104        | 1.435(18)       |  | C430        | C431        | 1.33(2)         |
| C104                                                 | C105        | 1.396(17)       |  | C431        | C432        | 1.51(2)         |
| C105                                                 | C106        | 1.397(18)       |  | C431        | C433        | 1.38(2)         |
| C106                                                 | C107        | 1.431(16)       |  | C433        | C434        | 1.42(2)         |
| C107                                                 | C108        | 1.314(17)       |  | O1          | C6          | 1.19(3)         |
| C108                                                 | C109        | 1.449(15)       |  | C1          | D1A         | 0.9800          |
| C109                                                 | C110        | 1.408(16)       |  | C1          | D1B         | 0.9800          |
| C110                                                 | C111        | 1.475(16)       |  | C1          | D1C         | 0.9800          |
| C110                                                 | C118        | 1.428(15)       |  | C1          | C6          | 1.52(5)         |
| C111                                                 | C112        | 1.402(16)       |  | C6          | C10         | 1.43(4)         |
| C111                                                 | C117        | 1.407(15)       |  | C10         | D10A        | 0.9800          |
| C112                                                 | C113        | 1.376(16)       |  | C10         | D10B        | 0.9800          |
| C113                                                 | C114        | 1.371(17)       |  | C10         | D10C        | 0.9800          |
| C114                                                 | C115        | 1.513(18)       |  | O2          | C2          | 1.24(3)         |
| C114                                                 | C116        | 1.380(19)       |  | C2          | C17         | 1.42(4)         |
| C116                                                 | C117        | 1.375(17)       |  | C2          | C18         | 1.37(4)         |
| C118                                                 | C119        | 1.408(15)       |  | C17         | D17A        | 0.9800          |
| C119                                                 | C120        | 1.359(15)       |  | C17         | D17B        | 0.9800          |
| C120                                                 | C121        | 1.424(16)       |  | C17         | D17C        | 0.9800          |
| C121                                                 | C122        | 1.389(15)       |  | C18         | D18A        | 0.9800          |
| C122                                                 | C123        | 1.399(16)       |  | C18         | D18B        | 0.9800          |
| C123                                                 | C124        | 1.438(15)       |  | C18         | D18C        | 0.9800          |
| C124                                                 | C125        | 1.341(18)       |  | O5          | C7          | 1.29(6)         |
| C125                                                 | C126        | 1.437(17)       |  | C3          | D3A         | 0.9800          |
| C126                                                 | C127        | 1.398(18)       |  | C3          | D3B         | 0.9800          |
| C127                                                 | C128        | 1.49(2)         |  | C3          | D3C         | 0.9800          |
| C128                                                 | C129        | 1.36(3)         |  | C3          | C7          | 1.47(5)         |
| C128                                                 | C134        | 1.42(2)         |  | C7          | C8          | 1.73(8)         |
| C129                                                 | C130        | 1.38(3)         |  | O15         | C5          | 1.19(3)         |
| C130                                                 | C131        | 1.25(5)         |  | C4          | D4A         | 0.9800          |
| C131                                                 | C132        | 1.56(3)         |  | C4          | D4B         | 0.9800          |
| C131                                                 | C133        | 1.45(4)         |  | C4          | D4C         | 0.9800          |
| C133                                                 | C134        | 1.40(3)         |  | C4          | C5          | 1.33(4)         |

| Atom | Atom | Length/Å  | Atom | Atom | Length/Å |
|------|------|-----------|------|------|----------|
| C201 | C202 | 1.40(3)   | C5   | C9   | 1.48(4)  |
| C201 | C227 | 1.43(3)   | C9   | D9A  | 0.9800   |
| C202 | C203 | 1.33(3)   | C9   | D9B  | 0.9800   |
| C203 | C204 | 1.49(2)   | C9   | D9C  | 0.9800   |
| C204 | C205 | 1.40(2)   | N51  | C51  | 1.53(2)  |
| C205 | C206 | 1.37(2)   | N51  | C71  | 1.55(2)  |
| C206 | C207 | 1.451(18) | N51  | C81  | 1.56(2)  |
| C207 | C208 | 1.350(18) | N51  | C61  | 1.57(3)  |
| C208 | C209 | 1.441(17) | C51  | C52  | 1.46(2)  |
| C209 | C210 | 1.376(17) | C71  | C72  | 1.55(2)  |
| C210 | C211 | 1.509(16) | C81  | C82  | 1.49(3)  |
| C210 | C218 | 1.393(17) | C52  | C53  | 1.46(3)  |
| C211 | C212 | 1.389(17) | C62  | C61  | 1.53(3)  |
| C211 | C217 | 1.375(16) | C62  | C63  | 1.58(3)  |
| C212 | C213 | 1.382(17) | C73  | C72  | 1.48(2)  |
| C213 | C214 | 1.404(19) | C73  | C74  | 1.51(2)  |
| C214 | C215 | 1.512(18) | C63  | C64  | 1.49(3)  |
| C214 | C216 | 1.401(18) | C53  | C54  | 1.52(3)  |
| C216 | C217 | 1.391(16) | C84  | C83  | 1.43(3)  |
| C218 | C219 | 1.436(18) | C83  | C82  | 1.46(3)  |
| C219 | C220 | 1.384(18) | C8   | D8A  | 0.9800   |
| C220 | C221 | 1.41(2)   | C8   | D8B  | 0.9800   |
| C221 | C222 | 1.410(19) | C8   | D8C  | 0.9800   |

<sup>1</sup>I-X, I-Y, I-Z

| Atom             | Atom | Atom             | Angle/°  | Atom | Atom | Atom | Angle/°   |
|------------------|------|------------------|----------|------|------|------|-----------|
| Mo1              | I1   | Mo2              | 57.28(3) | C129 | C128 | C127 | 124.4(19) |
| Mo1              | I1   | Mo3              | 57.31(3) | C129 | C128 | C134 | 115.4(18) |
| Mo3              | I1   | Mo2              | 57.07(3) | C134 | C128 | C127 | 120.2(18) |
| Mo1              | I2   | Mo3 <sup>1</sup> | 57.43(3) | C128 | C129 | C130 | 127(3)    |
| Mo2              | I2   | Mo1              | 58.01(3) | C131 | C130 | C129 | 120(4)    |
| Mo2              | I2   | Mo3 <sup>1</sup> | 58.00(3) | C130 | C131 | C132 | 125(4)    |
| Mo1 <sup>1</sup> | I3   | Mo3 <sup>1</sup> | 56.84(3) | C130 | C131 | C133 | 119(3)    |
| Mo2              | I3   | Mo1 <sup>1</sup> | 57.21(3) | C133 | C131 | C132 | 116(4)    |
| Mo2              | I3   | Mo3 <sup>1</sup> | 57.09(3) | C134 | C133 | C131 | 121(3)    |
| Mo1              | I4   | Mo2 <sup>1</sup> | 57.85(3) | C133 | C134 | C128 | 117(2)    |
| Mo1              | I4   | Mo3 <sup>1</sup> | 57.35(3) | N22  | C201 | C202 | 107.3(19) |
| Mo2 <sup>1</sup> | I4   | Mo3 <sup>1</sup> | 57.34(3) | N22  | C201 | C227 | 125.5(18) |
| N12              | Ru11 | N11              | 87.8(3)  | C202 | C201 | C227 | 127.1(17) |
| N12              | Ru11 | N15              | 88.8(4)  | C203 | C202 | C201 | 109.4(17) |
| N13              | Ru11 | N11              | 88.5(3)  | C202 | C203 | C204 | 105.9(19) |
| N13              | Ru11 | N12              | 90.3(4)  | N22  | C204 | C203 | 108.3(16) |

| Table S14. Bond angles for CP <sub>6+2</sub> |      |                 |          |  |      |      |      |           |
|----------------------------------------------|------|-----------------|----------|--|------|------|------|-----------|
| Atom                                         | Atom | Atom            | Angle/°  |  | Atom | Atom | Atom | Angle/°   |
| N13                                          | Ru11 | N15             | 175.4(3) |  | N22  | C204 | C205 | 126.4(15) |
| N14                                          | Ru11 | N11             | 88.7(3)  |  | C205 | C204 | C203 | 125.4(19) |
| N14                                          | Ru11 | N12             | 176.5(3) |  | C206 | C205 | C204 | 127.6(16) |
| N14                                          | Ru11 | N13             | 89.1(3)  |  | N23  | C206 | C205 | 124.8(13) |
| N14                                          | Ru11 | N15             | 91.5(4)  |  | N23  | C206 | C207 | 108.1(12) |
| N15                                          | Ru11 | N11             | 86.9(3)  |  | C205 | C206 | C207 | 127.0(15) |
| C11                                          | Ru11 | N11             | 176.3(5) |  | C208 | C207 | C206 | 107.9(12) |
| C11                                          | Ru11 | N12             | 95.4(5)  |  | C207 | C208 | C209 | 108.0(12) |
| C11                                          | Ru11 | N13             | 93.3(4)  |  | N23  | C209 | C208 | 107.4(11) |
| C11                                          | Ru11 | N14             | 88.1(5)  |  | C210 | C209 | N23  | 125.2(11) |
| C11                                          | Ru11 | N15             | 91.3(4)  |  | C210 | C209 | C208 | 127.3(11) |
| N22                                          | Ru21 | N21             | 88.2(5)  |  | C209 | C210 | C211 | 119.3(11) |
| N22                                          | Ru21 | N23             | 90.9(5)  |  | C209 | C210 | C218 | 126.1(11) |
| N22                                          | Ru21 | N25             | 89.3(6)  |  | C218 | C210 | C211 | 114.5(11) |
| N23                                          | Ru21 | N21             | 87.5(4)  |  | C212 | C211 | C210 | 120.2(11) |
| N23                                          | Ru21 | N25             | 174.6(4) |  | C217 | C211 | C210 | 121.8(11) |
| N24                                          | Ru21 | N21             | 87.8(4)  |  | C217 | C211 | C212 | 117.8(11) |
| N24                                          | Ru21 | N22             | 176.0(5) |  | C213 | C212 | C211 | 121.2(12) |
| N24                                          | Ru21 | N23             | 89.0(4)  |  | C212 | C213 | C214 | 121.4(12) |
| N24                                          | Ru21 | N25             | 90.4(5)  |  | C213 | C214 | C215 | 122.1(13) |
| N25                                          | Ru21 | N21             | 87.1(4)  |  | C216 | C214 | C213 | 116.8(12) |
| C21                                          | Ru21 | N21             | 179.0(6) |  | C216 | C214 | C215 | 121.1(13) |
| C21                                          | Ru21 | N22             | 92.8(6)  |  | C217 | C216 | C214 | 120.7(13) |
| C21                                          | Ru21 | N23             | 92.5(5)  |  | C211 | C217 | C216 | 121.9(12) |
| C21                                          | Ru21 | N24             | 91.2(5)  |  | N24  | C218 | C219 | 109.6(11) |
| C21                                          | Ru21 | N25             | 92.9(5)  |  | C210 | C218 | N24  | 124.5(12) |
| N32                                          | Ru31 | N31             | 88.4(4)  |  | C210 | C218 | C219 | 125.7(11) |
| N32                                          | Ru31 | N33             | 91.4(5)  |  | C220 | C219 | C218 | 106.9(12) |
| N32                                          | Ru31 | N35             | 88.0(6)  |  | C219 | C220 | C221 | 107.4(13) |
| N33                                          | Ru31 | N31             | 88.5(4)  |  | N24  | C221 | C220 | 110.7(12) |
| N34                                          | Ru31 | N31             | 85.6(4)  |  | N24  | C221 | C222 | 122.7(15) |
| N34                                          | Ru31 | N32             | 173.9(4) |  | C222 | C221 | C220 | 126.6(15) |
| N34                                          | Ru31 | N33             | 88.7(4)  |  | C223 | C222 | C221 | 128.7(17) |
| N34                                          | Ru31 | N35             | 91.4(5)  |  | N25  | C223 | C224 | 110.4(19) |
| N35                                          | Ru31 | N31             | 87.5(4)  |  | C222 | C223 | N25  | 126.2(14) |
| N35                                          | Ru31 | N33             | 176.0(4) |  | C222 | C223 | C224 | 123(2)    |
| C31                                          | Ru31 | N31             | 177.7(6) |  | C225 | C224 | C223 | 108(2)    |
| C31                                          | Ru31 | N32             | 89.7(5)  |  | C224 | C225 | C226 | 109.2(17) |
| C31                                          | Ru31 | N33             | 90.3(5)  |  | N25  | C226 | C225 | 103.1(19) |
| C31                                          | Ru31 | N34             | 96.3(5)  |  | C227 | C226 | N25  | 127.7(18) |
| C31                                          | Ru31 | N35             | 93.7(5)  |  | C227 | C226 | C225 | 128.9(18) |
| I1                                           | Mo1  | I3 <sup>1</sup> | 89.86(3) |  | C201 | C227 | C228 | 115(2)    |
| I2                                           | Mo1  | I1              | 89.75(4) |  | C226 | C227 | C201 | 125.3(16) |

| Table S14. Bond angles for CP <sub>6+2</sub> |      |                  |            |  |      |      |      |           |
|----------------------------------------------|------|------------------|------------|--|------|------|------|-----------|
| Atom                                         | Atom | Atom             | Angle/°    |  | Atom | Atom | Atom | Angle/°   |
| I2                                           | Mo1  | I3 <sup>1</sup>  | 177.25(4)  |  | C226 | C227 | C228 | 119(2)    |
| I4                                           | Mo1  | I1               | 176.25(4)  |  | C229 | C228 | C227 | 123(2)    |
| I4                                           | Mo1  | I2               | 90.81(3)   |  | C234 | C228 | C227 | 122.5(19) |
| I4                                           | Mo1  | I3 <sup>1</sup>  | 89.41(3)   |  | C234 | C228 | C229 | 112(2)    |
| Mo2                                          | Mo1  | I1               | 61.56(3)   |  | C228 | C229 | C230 | 122(3)    |
| Mo2 <sup>1</sup>                             | Mo1  | I1               | 121.37(4)  |  | C231 | C230 | C229 | 119(3)    |
| Mo2                                          | Mo1  | I2               | 60.62(3)   |  | C230 | C231 | C232 | 116(3)    |
| Mo2 <sup>1</sup>                             | Mo1  | I2               | 121.27(4)  |  | C230 | C231 | C233 | 109(3)    |
| Mo2 <sup>1</sup>                             | Mo1  | I3 <sup>1</sup>  | 61.14(3)   |  | C233 | C231 | C232 | 119(3)    |
| Mo2                                          | Mo1  | I3 <sup>1</sup>  | 121.43(4)  |  | C231 | C233 | C234 | 118(3)    |
| Mo2                                          | Mo1  | I4               | 121.82(4)  |  | C228 | C234 | C233 | 124(3)    |
| Mo2 <sup>1</sup>                             | Mo1  | I4               | 61.28(3)   |  | N32  | C301 | C302 | 108.6(19) |
| Mo2                                          | Mo1  | Mo2 <sup>1</sup> | 90.20(4)   |  | N32  | C301 | C327 | 122.3(17) |
| Mo3                                          | Mo1  | I1               | 61.40(3)   |  | C327 | C301 | C302 | 129.1(15) |
| Mo3 <sup>1</sup>                             | Mo1  | I1               | 121.76(4)  |  | C303 | C302 | C301 | 107.3(15) |
| Mo3                                          | Mo1  | I2               | 120.45(4)  |  | C302 | C303 | C304 | 109(2)    |
| Mo3 <sup>1</sup>                             | Mo1  | I2               | 61.39(3)   |  | N32  | C304 | C303 | 109.4(17) |
| Mo3 <sup>1</sup>                             | Mo1  | I3 <sup>1</sup>  | 121.02(4)  |  | N32  | C304 | C305 | 126.2(15) |
| Mo3                                          | Mo1  | I3 <sup>1</sup>  | 61.60(3)   |  | C305 | C304 | C303 | 124(2)    |
| Mo3 <sup>1</sup>                             | Mo1  | I4               | 61.62(3)   |  | C306 | C305 | C304 | 127.0(17) |
| Mo3                                          | Mo1  | I4               | 121.27(4)  |  | N33  | C306 | C305 | 124.5(14) |
| Mo3 <sup>1</sup>                             | Mo1  | Mo2 <sup>1</sup> | 59.88(3)   |  | N33  | C306 | C307 | 109.0(12) |
| Mo3                                          | Mo1  | Mo2              | 59.84(3)   |  | C307 | C306 | C305 | 126.6(16) |
| Mo3                                          | Mo1  | Mo2 <sup>1</sup> | 60.00(3)   |  | C308 | C307 | C306 | 107.6(14) |
| Mo3 <sup>1</sup>                             | Mo1  | Mo2              | 60.20(3)   |  | C307 | C308 | C309 | 109.5(12) |
| Mo3 <sup>1</sup>                             | Mo1  | Mo3              | 89.74(4)   |  | N33  | C309 | C308 | 106.7(12) |
| O11                                          | Mo1  | I1               | 88.9(2)    |  | N33  | C309 | C310 | 124.3(12) |
| O11                                          | Mo1  | I2               | 91.78(19)  |  | C310 | C309 | C308 | 129.0(11) |
| O11                                          | Mo1  | I3 <sup>1</sup>  | 85.49(19)  |  | C309 | C310 | C311 | 116.6(11) |
| O11                                          | Mo1  | I4               | 87.3(2)    |  | C318 | C310 | C309 | 126.1(11) |
| O11                                          | Mo1  | Mo2 <sup>1</sup> | 132.3(2)   |  | C318 | C310 | C311 | 117.1(11) |
| O11                                          | Mo1  | Mo2              | 137.5(2)   |  | C312 | C311 | C310 | 119.1(10) |
| O11                                          | Mo1  | Mo3 <sup>1</sup> | 136.49(19) |  | C312 | C311 | C317 | 118.6(11) |
| O11                                          | Mo1  | Mo3              | 133.65(19) |  | C317 | C311 | C310 | 122.2(10) |
| I2                                           | Mo2  | I1               | 89.94(3)   |  | C311 | C312 | C313 | 120.5(12) |
| I2                                           | Mo2  | I3               | 89.87(3)   |  | C312 | C313 | C314 | 121.1(12) |
| I2                                           | Mo2  | I4 <sup>1</sup>  | 176.90(4)  |  | C313 | C314 | C315 | 120.8(12) |
| I3                                           | Mo2  | I1               | 176.82(5)  |  | C316 | C314 | C313 | 118.1(11) |
| I4 <sup>1</sup>                              | Mo2  | I1               | 90.56(3)   |  | C316 | C314 | C315 | 121.0(12) |
| I4 <sup>1</sup>                              | Mo2  | I3               | 89.47(3)   |  | C314 | C316 | C317 | 121.9(12) |
| Mo1                                          | Mo2  | I1               | 61.16(3)   |  | C311 | C317 | C316 | 119.7(12) |
| Mo1 <sup>1</sup>                             | Mo2  | I1               | 121.02(4)  |  | N34  | C318 | C319 | 107.4(11) |
| Mo1                                          | Mo2  | I2               | 61.37(3)   |  | C310 | C318 | N34  | 125.7(12) |

| Table S14. Bond angles for CP <sub>6+2</sub> |      |                  |           |  |      |      |      |           |
|----------------------------------------------|------|------------------|-----------|--|------|------|------|-----------|
| Atom                                         | Atom | Atom             | Angle/°   |  | Atom | Atom | Atom | Angle/°   |
| Mo1 <sup>1</sup>                             | Mo2  | I2               | 121.29(4) |  | C310 | C318 | C319 | 126.9(11) |
| Mo1                                          | Mo2  | I3               | 121.38(4) |  | C320 | C319 | C318 | 108.8(12) |
| Mo1 <sup>1</sup>                             | Mo2  | I3               | 61.65(3)  |  | C319 | C320 | C321 | 106.5(13) |
| Mo1 <sup>1</sup>                             | Mo2  | I4 <sup>1</sup>  | 60.87(3)  |  | N34  | C321 | C320 | 109.9(11) |
| Mo1                                          | Mo2  | I4 <sup>1</sup>  | 121.45(4) |  | N34  | C321 | C322 | 124.9(14) |
| Mo1                                          | Mo2  | Mo1 <sup>1</sup> | 89.80(4)  |  | C322 | C321 | C320 | 125.2(14) |
| Mo1                                          | Mo2  | Mo3 <sup>1</sup> | 59.67(3)  |  | C321 | C322 | C323 | 126.6(15) |
| Mo3 <sup>1</sup>                             | Mo2  | I1               | 120.82(4) |  | N35  | C323 | C322 | 127.1(14) |
| Mo3                                          | Mo2  | I1               | 61.31(3)  |  | N35  | C323 | C324 | 109.8(16) |
| Mo3                                          | Mo2  | I2               | 121.39(4) |  | C322 | C323 | C324 | 123.0(19) |
| Mo3 <sup>1</sup>                             | Mo2  | I2               | 61.48(3)  |  | C325 | C324 | C323 | 103.9(19) |
| Mo3                                          | Mo2  | I3               | 121.34(4) |  | C324 | C325 | C326 | 110.3(16) |
| Mo3 <sup>1</sup>                             | Mo2  | I3               | 61.73(3)  |  | N35  | C326 | C325 | 108.2(19) |
| Mo3 <sup>1</sup>                             | Mo2  | I4 <sup>1</sup>  | 120.69(4) |  | N35  | C326 | C327 | 124.9(17) |
| Mo3                                          | Mo2  | I4 <sup>1</sup>  | 61.42(3)  |  | C327 | C326 | C325 | 126.5(16) |
| Mo3                                          | Mo2  | Mo1              | 60.03(3)  |  | C301 | C327 | C328 | 117.5(19) |
| Mo3 <sup>1</sup>                             | Mo2  | Mo1 <sup>1</sup> | 59.83(3)  |  | C326 | C327 | C301 | 126.9(14) |
| Mo3                                          | Mo2  | Mo1 <sup>1</sup> | 59.71(3)  |  | C326 | C327 | C328 | 116(2)    |
| Mo3                                          | Mo2  | Mo3 <sup>1</sup> | 89.54(4)  |  | C329 | C328 | C327 | 121.7(17) |
| O21                                          | Mo2  | I1               | 88.4(2)   |  | C334 | C328 | C327 | 119.3(18) |
| O21                                          | Mo2  | I2               | 91.5(2)   |  | C334 | C328 | C329 | 119.0(16) |
| O21                                          | Mo2  | I3               | 88.4(2)   |  | C330 | C329 | C328 | 122(2)    |
| O21                                          | Mo2  | I4 <sup>1</sup>  | 85.4(2)   |  | C329 | C330 | C331 | 119(2)    |
| O21                                          | Mo2  | Mo1              | 137.1(2)  |  | C330 | C331 | C332 | 119(3)    |
| O21                                          | Mo2  | Mo1 <sup>1</sup> | 133.0(2)  |  | C330 | C331 | C333 | 121.6(17) |
| O21                                          | Mo2  | Mo3 <sup>1</sup> | 137.7(2)  |  | C333 | C331 | C332 | 119(3)    |
| O21                                          | Mo2  | Mo3              | 132.7(2)  |  | C331 | C333 | C334 | 115(3)    |
| I1                                           | Mo3  | I3 <sup>1</sup>  | 89.77(3)  |  | C328 | C334 | C333 | 123(2)    |
| I2 <sup>1</sup>                              | Mo3  | I1               | 176.65(4) |  | N41  | Ru41 | O41  | 87.7(4)   |
| I2 <sup>1</sup>                              | Mo3  | I3 <sup>1</sup>  | 89.05(3)  |  | N42  | Ru41 | O41  | 89.9(3)   |
| I2 <sup>1</sup>                              | Mo3  | I4 <sup>1</sup>  | 90.37(3)  |  | N42  | Ru41 | N41  | 90.8(4)   |
| I4 <sup>1</sup>                              | Mo3  | I1               | 90.63(4)  |  | N43  | Ru41 | O41  | 86.9(3)   |
| I4 <sup>1</sup>                              | Mo3  | I3 <sup>1</sup>  | 176.74(4) |  | N43  | Ru41 | N41  | 174.5(4)  |
| Mo1                                          | Mo3  | I1               | 61.29(3)  |  | N43  | Ru41 | N42  | 88.5(4)   |
| Mo1 <sup>1</sup>                             | Mo3  | I1               | 122.03(4) |  | N44  | Ru41 | O41  | 84.2(3)   |
| Mo1                                          | Mo3  | I2 <sup>1</sup>  | 120.68(4) |  | N44  | Ru41 | N41  | 88.5(4)   |
| Mo1 <sup>1</sup>                             | Mo3  | I2 <sup>1</sup>  | 61.18(3)  |  | N44  | Ru41 | N42  | 174.1(4)  |
| Mo1 <sup>1</sup>                             | Mo3  | I3 <sup>1</sup>  | 121.29(4) |  | N44  | Ru41 | N43  | 91.7(4)   |
| Mo1                                          | Mo3  | I3 <sup>1</sup>  | 61.56(3)  |  | C41  | Ru41 | O41  | 177.4(5)  |
| Mo1 <sup>1</sup>                             | Mo3  | I4 <sup>1</sup>  | 61.03(3)  |  | C41  | Ru41 | N41  | 93.2(5)   |
| Mo1                                          | Mo3  | I4 <sup>1</sup>  | 121.37(4) |  | C41  | Ru41 | N42  | 92.5(5)   |
| Mo1 <sup>1</sup>                             | Mo3  | Mo1              | 90.26(4)  |  | C41  | Ru41 | N43  | 92.3(5)   |
| Mo1 <sup>1</sup>                             | Mo3  | Mo2 <sup>1</sup> | 60.13(3)  |  | C41  | Ru41 | N44  | 93.4(5)   |

| Table S14. Bond angles for CP <sub>6+2</sub> |      |                  |            |  |      |      |      |           |
|----------------------------------------------|------|------------------|------------|--|------|------|------|-----------|
| Atom                                         | Atom | Atom             | Angle/°    |  | Atom | Atom | Atom | Angle/°   |
| Mo1                                          | Mo3  | Mo2 <sup>1</sup> | 60.17(3)   |  | C401 | N41  | Ru41 | 127.3(9)  |
| Mo1 <sup>1</sup>                             | Mo3  | Mo2              | 60.41(3)   |  | C401 | N41  | C404 | 109.0(11) |
| Mo2 <sup>1</sup>                             | Mo3  | I1               | 121.44(4)  |  | C404 | N41  | Ru41 | 123.6(9)  |
| Mo2                                          | Mo3  | I1               | 61.62(3)   |  | C406 | N42  | Ru41 | 125.2(8)  |
| Mo2                                          | Mo3  | I2 <sup>1</sup>  | 121.60(4)  |  | C406 | N42  | C409 | 106.7(10) |
| Mo2 <sup>1</sup>                             | Mo3  | I2 <sup>1</sup>  | 60.52(3)   |  | C409 | N42  | Ru41 | 127.9(8)  |
| Mo2 <sup>1</sup>                             | Mo3  | I3 <sup>1</sup>  | 61.18(3)   |  | C418 | N43  | Ru41 | 128.0(7)  |
| Mo2                                          | Mo3  | I3 <sup>1</sup>  | 121.68(4)  |  | C421 | N43  | Ru41 | 124.1(7)  |
| Mo2                                          | Mo3  | I4 <sup>1</sup>  | 61.24(3)   |  | C421 | N43  | C418 | 107.9(9)  |
| Mo2 <sup>1</sup>                             | Mo3  | I4 <sup>1</sup>  | 121.15(4)  |  | C423 | N44  | Ru41 | 125.2(8)  |
| Mo2                                          | Mo3  | Mo1              | 60.13(3)   |  | C423 | N44  | C426 | 106.1(10) |
| Mo2                                          | Mo3  | Mo2 <sup>1</sup> | 90.47(4)   |  | C426 | N44  | Ru41 | 128.6(8)  |
| O31                                          | Mo3  | I1               | 87.7(2)    |  | O42  | C41  | Ru41 | 179.2(12) |
| O31                                          | Mo3  | I2 <sup>1</sup>  | 89.0(2)    |  | N41  | C401 | C402 | 106.9(13) |
| O31                                          | Mo3  | I3 <sup>1</sup>  | 85.7(2)    |  | N41  | C401 | C427 | 125.4(12) |
| O31                                          | Mo3  | I4 <sup>1</sup>  | 91.1(2)    |  | C427 | C401 | C402 | 127.6(13) |
| O31                                          | Mo3  | Mo1              | 132.91(18) |  | C403 | C402 | C401 | 109.2(13) |
| O31                                          | Mo3  | Mo1 <sup>1</sup> | 136.78(18) |  | C402 | C403 | C404 | 106.6(14) |
| O31                                          | Mo3  | Mo2 <sup>1</sup> | 133.2(2)   |  | N41  | C404 | C403 | 108.2(14) |
| O31                                          | Mo3  | Mo2              | 136.3(2)   |  | N41  | C404 | C405 | 127.3(12) |
| C20                                          | O11  | Mo1              | 137.8(7)   |  | C405 | C404 | C403 | 124.5(14) |
| C27                                          | O21  | Mo2              | 133.7(8)   |  | C404 | C405 | C406 | 126.9(13) |
| C37                                          | O31  | Mo3              | 129.2(7)   |  | N42  | C406 | C405 | 125.2(13) |
| C13                                          | N11  | Ru11             | 120.8(7)   |  | N42  | C406 | C407 | 110.9(11) |
| C14                                          | N11  | Ru11             | 123.6(7)   |  | C405 | C406 | C407 | 123.9(13) |
| C14                                          | N11  | C13              | 115.7(9)   |  | C408 | C407 | C406 | 105.3(12) |
| C101                                         | N12  | Ru11             | 126.9(8)   |  | C407 | C408 | C409 | 108.8(12) |
| C104                                         | N12  | Ru11             | 127.0(8)   |  | N42  | C409 | C408 | 108.2(11) |
| C104                                         | N12  | C101             | 106.1(10)  |  | N42  | C409 | C410 | 125.2(10) |
| C106                                         | N13  | Ru11             | 125.9(8)   |  | C410 | C409 | C408 | 126.6(11) |
| C106                                         | N13  | C109             | 106.2(9)   |  | C409 | C410 | C411 | 116.4(10) |
| C109                                         | N13  | Ru11             | 127.8(7)   |  | C418 | C410 | C409 | 125.2(10) |
| C118                                         | N14  | Ru11             | 128.5(7)   |  | C418 | C410 | C411 | 118.3(10) |
| C121                                         | N14  | Ru11             | 125.5(7)   |  | C412 | C411 | C410 | 120.5(11) |
| C121                                         | N14  | C118             | 105.8(9)   |  | C417 | C411 | C410 | 121.4(11) |
| C123                                         | N15  | Ru11             | 124.9(8)   |  | C417 | C411 | C412 | 118.1(11) |
| C123                                         | N15  | C126             | 107.9(9)   |  | C413 | C412 | C411 | 121.2(12) |
| C126                                         | N15  | Ru11             | 127.2(8)   |  | C414 | C413 | C412 | 120.1(12) |
| C23                                          | N21  | Ru21             | 121.3(10)  |  | C413 | C414 | C415 | 120.1(13) |
| C23                                          | N21  | C24              | 114.7(12)  |  | C413 | C414 | C416 | 118.8(12) |
| C24                                          | N21  | Ru21             | 123.8(8)   |  | C416 | C414 | C415 | 121.2(15) |
| C201                                         | N22  | Ru21             | 125.4(15)  |  | C417 | C416 | C414 | 121.6(14) |
| C204                                         | N22  | Ru21             | 125.4(10)  |  | C411 | C417 | C416 | 120.2(12) |

| Table S14. Bond angles for CP <sub>6+2</sub> |      |      |           |  |      |      |      |           |
|----------------------------------------------|------|------|-----------|--|------|------|------|-----------|
| Atom                                         | Atom | Atom | Angle/°   |  | Atom | Atom | Atom | Angle/°   |
| C204                                         | N22  | C201 | 109.1(16) |  | N43  | C418 | C410 | 125.1(10) |
| C206                                         | N23  | Ru21 | 124.7(8)  |  | N43  | C418 | C419 | 108.6(9)  |
| C206                                         | N23  | C209 | 108.5(10) |  | C410 | C418 | C419 | 126.2(10) |
| C209                                         | N23  | Ru21 | 126.8(9)  |  | C420 | C419 | C418 | 108.1(10) |
| C218                                         | N24  | Ru21 | 127.9(9)  |  | C419 | C420 | C421 | 107.3(10) |
| C221                                         | N24  | Ru21 | 126.8(9)  |  | N43  | C421 | C420 | 108.0(10) |
| C221                                         | N24  | C218 | 105.3(11) |  | N43  | C421 | C422 | 127.3(10) |
| C223                                         | N25  | Ru21 | 125.1(10) |  | C422 | C421 | C420 | 124.6(11) |
| C223                                         | N25  | C226 | 108.9(14) |  | C421 | C422 | C423 | 124.9(11) |
| C226                                         | N25  | Ru21 | 126.0(14) |  | N44  | C423 | C422 | 126.3(10) |
| C33                                          | N31  | Ru31 | 121.5(7)  |  | N44  | C423 | C424 | 109.3(11) |
| C33                                          | N31  | C34  | 117.5(10) |  | C422 | C423 | C424 | 124.4(13) |
| C34                                          | N31  | Ru31 | 121.0(7)  |  | C425 | C424 | C423 | 106.0(12) |
| C301                                         | N32  | Ru31 | 128.8(15) |  | C424 | C425 | C426 | 108.6(12) |
| C304                                         | N32  | Ru31 | 125.5(10) |  | N44  | C426 | C427 | 123.7(12) |
| C304                                         | N32  | C301 | 105.5(15) |  | C425 | C426 | N44  | 110.0(12) |
| C306                                         | N33  | Ru31 | 125.4(9)  |  | C425 | C426 | C427 | 126.2(12) |
| C306                                         | N33  | C309 | 107.3(11) |  | C401 | C427 | C428 | 117.4(12) |
| C309                                         | N33  | Ru31 | 127.3(10) |  | C426 | C427 | C401 | 126.2(12) |
| C318                                         | N34  | Ru31 | 126.9(9)  |  | C426 | C427 | C428 | 116.4(13) |
| C321                                         | N34  | Ru31 | 125.6(9)  |  | C429 | C428 | C427 | 122.6(13) |
| C321                                         | N34  | C318 | 107.5(11) |  | C434 | C428 | C427 | 119.8(12) |
| C323                                         | N35  | Ru31 | 124.3(9)  |  | C434 | C428 | C429 | 117.1(14) |
| C323                                         | N35  | C326 | 107.8(15) |  | C428 | C429 | C430 | 120.2(14) |
| C326                                         | N35  | Ru31 | 128.0(14) |  | C431 | C430 | C429 | 123.9(13) |
| O13                                          | C11  | Ru11 | 172.7(13) |  | C430 | C431 | C432 | 121.4(15) |
| C13                                          | C12  | C16  | 118.6(10) |  | C430 | C431 | C433 | 113.8(15) |
| N11                                          | C13  | C12  | 124.6(11) |  | C433 | C431 | C432 | 122.9(17) |
| N11                                          | C14  | C15  | 124.1(10) |  | C431 | C433 | C434 | 121.4(17) |
| C14                                          | C15  | C16  | 119.6(11) |  | C428 | C434 | C433 | 121.1(15) |
| C12                                          | C16  | C20  | 120.1(9)  |  | D1A  | C1   | D1B  | 109.5     |
| C15                                          | C16  | C12  | 117.3(9)  |  | D1A  | C1   | D1C  | 109.5     |
| C15                                          | C16  | C20  | 122.5(10) |  | D1B  | C1   | D1C  | 109.5     |
| O11                                          | C20  | C16  | 112.1(9)  |  | C6   | C1   | D1A  | 109.5     |
| O12                                          | C20  | O11  | 129.1(9)  |  | C6   | C1   | D1B  | 109.5     |
| O12                                          | C20  | C16  | 118.7(9)  |  | C6   | C1   | D1C  | 109.5     |
| O23                                          | C21  | Ru21 | 178.3(14) |  | O1   | C6   | C1   | 123(3)    |
| C23                                          | C22  | C26  | 120.4(14) |  | O1   | C6   | C10  | 122(3)    |
| N21                                          | C23  | C22  | 122.4(15) |  | C10  | C6   | C1   | 115(3)    |
| N21                                          | C24  | C25  | 124.8(12) |  | C6   | C10  | D10A | 109.5     |
| C26                                          | C25  | C24  | 120.2(13) |  | C6   | C10  | D10B | 109.5     |
| C22                                          | C26  | C27  | 120.7(13) |  | C6   | C10  | D10C | 109.5     |
| C25                                          | C26  | C22  | 117.0(13) |  | D10A | C10  | D10B | 109.5     |

| Table S14. Bond angles for CP <sub>6+2</sub> |      |      |           |  |      |      |      |         |
|----------------------------------------------|------|------|-----------|--|------|------|------|---------|
| Atom                                         | Atom | Atom | Angle/°   |  | Atom | Atom | Atom | Angle/° |
| C25                                          | C26  | C27  | 122.2(14) |  | D10A | C10  | D10C | 109.5   |
| O21                                          | C27  | C26  | 110.6(12) |  | D10B | C10  | D10C | 109.5   |
| O22                                          | C27  | O21  | 129.3(14) |  | O2   | C2   | C17  | 117(3)  |
| O22                                          | C27  | C26  | 120.1(14) |  | O2   | C2   | C18  | 118(2)  |
| O33                                          | C31  | Ru31 | 174.9(14) |  | C18  | C2   | C17  | 125(3)  |
| C33                                          | C32  | C36  | 120.3(10) |  | C2   | C17  | D17A | 109.5   |
| N31                                          | C33  | C32  | 122.3(10) |  | C2   | C17  | D17B | 109.5   |
| N31                                          | C34  | C35  | 123.2(10) |  | C2   | C17  | D17C | 109.5   |
| C34                                          | C35  | C36  | 119.4(10) |  | D17A | C17  | D17B | 109.5   |
| C32                                          | C36  | C35  | 117.2(9)  |  | D17A | C17  | D17C | 109.5   |
| C32                                          | C36  | C37  | 122.0(9)  |  | D17B | C17  | D17C | 109.5   |
| C35                                          | C36  | C37  | 120.8(9)  |  | C2   | C18  | D18A | 109.5   |
| O31                                          | C37  | O32  | 124.3(10) |  | C2   | C18  | D18B | 109.5   |
| O31                                          | C37  | C36  | 116.1(9)  |  | C2   | C18  | D18C | 109.5   |
| O32                                          | C37  | C36  | 119.5(9)  |  | D18A | C18  | D18B | 109.5   |
| N12                                          | C101 | C102 | 107.4(12) |  | D18A | C18  | D18C | 109.5   |
| C127                                         | C101 | N12  | 125.3(13) |  | D18B | C18  | D18C | 109.5   |
| C127                                         | C101 | C102 | 127.3(13) |  | D3A  | C3   | D3B  | 109.5   |
| C103                                         | C102 | C101 | 109.9(13) |  | D3A  | C3   | D3C  | 109.5   |
| C102                                         | C103 | C104 | 104.8(13) |  | D3B  | C3   | D3C  | 109.5   |
| N12                                          | C104 | C103 | 111.8(11) |  | C7   | C3   | D3A  | 109.5   |
| N12                                          | C104 | C105 | 124.3(12) |  | C7   | C3   | D3B  | 109.5   |
| C105                                         | C104 | C103 | 124.0(13) |  | C7   | C3   | D3C  | 109.5   |
| C104                                         | C105 | C106 | 127.1(12) |  | O5   | C7   | C3   | 124(5)  |
| N13                                          | C106 | C105 | 125.4(11) |  | O5   | C7   | C8   | 126(4)  |
| N13                                          | C106 | C107 | 109.6(11) |  | C3   | C7   | C8   | 108(4)  |
| C105                                         | C106 | C107 | 125.0(11) |  | D4A  | C4   | D4B  | 109.5   |
| C108                                         | C107 | C106 | 107.6(11) |  | D4A  | C4   | D4C  | 109.5   |
| C107                                         | C108 | C109 | 108.2(11) |  | D4B  | C4   | D4C  | 109.5   |
| N13                                          | C109 | C108 | 108.3(11) |  | C5   | C4   | D4A  | 109.5   |
| N13                                          | C109 | C110 | 125.7(9)  |  | C5   | C4   | D4B  | 109.5   |
| C110                                         | C109 | C108 | 126.0(11) |  | C5   | C4   | D4C  | 109.5   |
| C109                                         | C110 | C111 | 117.9(10) |  | O15  | C5   | C4   | 119(3)  |
| C109                                         | C110 | C118 | 124.9(10) |  | O15  | C5   | C9   | 122(3)  |
| C118                                         | C110 | C111 | 117.2(10) |  | C4   | C5   | C9   | 119(3)  |
| C112                                         | C111 | C110 | 122.1(10) |  | C5   | C9   | D9A  | 109.5   |
| C112                                         | C111 | C117 | 117.1(12) |  | C5   | C9   | D9B  | 109.5   |
| C117                                         | C111 | C110 | 120.8(11) |  | C5   | C9   | D9C  | 109.5   |
| C113                                         | C112 | C111 | 119.8(11) |  | D9A  | C9   | D9B  | 109.5   |
| C114                                         | C113 | C112 | 123.1(13) |  | D9A  | C9   | D9C  | 109.5   |
| C113                                         | C114 | C115 | 120.2(14) |  | D9B  | C9   | D9C  | 109.5   |
| C113                                         | C114 | C116 | 117.5(12) |  | C51  | N51  | C71  | 111(2)  |
| C116                                         | C114 | C115 | 122.3(13) |  | C51  | N51  | C81  | 95(2)   |



| Atom | Atom | Atom | Angle/°   | Atom | Atom | Atom | Angle/° |
|------|------|------|-----------|------|------|------|---------|
| C117 | C116 | C114 | 121.2(12) | C51  | N51  | C61  | 108(2)  |
| C116 | C117 | C111 | 121.3(12) | C71  | N51  | C81  | 131(2)  |
| N14  | C118 | C110 | 123.9(10) | C71  | N51  | C61  | 102(2)  |
| N14  | C118 | C119 | 109.2(9)  | C81  | N51  | C61  | 109(2)  |
| C119 | C118 | C110 | 126.9(10) | C52  | C51  | N51  | 115(2)  |
| C120 | C119 | C118 | 108.5(10) | N51  | C71  | C72  | 104(2)  |
| C119 | C120 | C121 | 106.8(10) | C82  | C81  | N51  | 114(3)  |
| N14  | C121 | C120 | 109.7(9)  | C51  | C52  | C53  | 114(2)  |
| N14  | C121 | C122 | 125.2(11) | C61  | C62  | C63  | 105(2)  |
| C122 | C121 | C120 | 125.1(11) | C62  | C61  | N51  | 109(3)  |
| C121 | C122 | C123 | 127.1(11) | C72  | C73  | C74  | 110(2)  |
| N15  | C123 | C122 | 125.4(10) | C73  | C72  | C71  | 103(2)  |
| N15  | C123 | C124 | 108.9(11) | C64  | C63  | C62  | 110(2)  |
| C122 | C123 | C124 | 125.6(11) | C52  | C53  | C54  | 115(3)  |
| C125 | C124 | C123 | 106.3(11) | C84  | C83  | C82  | 115(3)  |
| C124 | C125 | C126 | 110.4(12) | C83  | C82  | C81  | 108(2)  |
| N15  | C126 | C125 | 106.5(11) | C7   | C8   | D8A  | 109.5   |
| N15  | C126 | C127 | 124.6(11) | C7   | C8   | D8B  | 109.5   |
| C127 | C126 | C125 | 129.0(12) | C7   | C8   | D8C  | 109.5   |
| C101 | C127 | C126 | 127.1(13) | D8A  | C8   | D8B  | 109.5   |
| C101 | C127 | C128 | 117.6(13) | D8A  | C8   | D8C  | 109.5   |
| C126 | C127 | C128 | 115.3(12) | D8B  | C8   | D8C  | 109.5   |

<sup>1</sup>1-X,1-Y,1-Z

**Table S14.** Comparison of the geometry of Mo cluster complexes in several crystal structures.

| Complex                                                          | Mo–Mo, Å                  | Mo–μ <sub>3</sub> –I, Å   | Mo–L, Å                                                             | Reference     |
|------------------------------------------------------------------|---------------------------|---------------------------|---------------------------------------------------------------------|---------------|
| <b>CP<sub>6</sub> with RuDTolP(CO)</b>                           | 2.643(2)–<br>2.6638(13)   | 2.7491(13)–<br>2.8087(11) | <i>L</i> = C <sub>5</sub> NH <sub>4</sub> COO;<br>2.097(7)–2.116(7) | This work     |
| <b>CP<sub>6+2</sub> with RuDTolP(CO)</b>                         | 2.6587(11)–<br>2.6780(12) | 2.7447(8)–<br>2.8043(9)   | <i>L</i> = C <sub>5</sub> NH <sub>4</sub> COO;<br>2.098(6)–2.122(7) | This work     |
| <b>[{Mo<sub>6</sub>I<sub>8</sub>}L<sub>6</sub>]<sup>2-</sup></b> | 2.6599(7)–<br>2.6725(8)   | 2.7642(7)–<br>2.8057(7)   | <i>L</i> = C <sub>6</sub> H <sub>5</sub> COO;<br>2.097(4)           | <sup>14</sup> |
| <b>PyMoC</b>                                                     | 2.6652(4)–<br>2.6738(4)   | 2.7630(4)–<br>2.8067(4)   | <i>L</i> = C <sub>5</sub> NH <sub>4</sub> COO;<br>2.119(3)–2.168(3) | <sup>1</sup>  |
| <b>CP<sub>2</sub> with ZnDTolP</b>                               | 2.6570(5)–<br>2.6774(5)   | 2.7728(5)–<br>2.7937(5)   | <i>L</i> = C <sub>5</sub> NH <sub>4</sub> COO;<br>2.110(3)–2.136(3) | <sup>1</sup>  |
| <b>CP<sub>6+2</sub> with ZnDTolP</b>                             | 2.6558(16)–<br>2.6733(16) | 2.7574(15)–<br>2.8017(15) | <i>L</i> = C <sub>5</sub> NH <sub>4</sub> COO;<br>2.074(9)–2.101(9) | <sup>1</sup>  |

In both Ru structures, **CP<sub>6</sub>** and **CP<sub>6+2</sub>**, the geometry of the [**Mo<sub>6</sub>I<sub>8</sub>**](PyCOO)<sub>6</sub>]<sup>2-</sup> cluster is typical (Table S15) for such compounds, and both hybrid systems with porphyrins crystallize as a tetra-*n*-butylammonium salt. The ruthenium porphyrin also has typical geometry where the metal ion is located inside the porphyrin ring and adopts an octahedral geometry due to the axial pyridyl and CO ligands (Table S16). The Ru–N(Por) bond

distances span the range of 2.007(14)–2.105(13) Å for **CP<sub>6</sub>**, and 2.029(10)–2.086(10) Å for **CP<sub>6+2</sub>** (Table S16), which is larger than in the **RuDTolP(CO)** structures discussed above. The carbonyl ligand is coordinated to the ruthenium ion almost linearly with Ru–C(CO)–O(CO) angles of 177–179° and 174–178° for **CP<sub>6</sub>** and **CP<sub>6+2</sub>**, respectively. The Ru–C bond distances are 1.810(14)–1.829(14) Å for **CP<sub>6</sub>** and 1.827(11)–1.845(13) Å for **CP<sub>6+2</sub>**, which is close to those in Ru(TPP)(CO)(Py) (1.838 Å)<sup>7</sup> and **RuDTolP(CO)Py** and in the supramolecular structures assembled by coordination of pyridine to a ruthenium porphyrin<sup>10,15</sup>. The Ru–N(Py) distances span 2.166(10)–2.168(8) Å in **CP<sub>6</sub>** and 2.159(8)–2.192(7) Å in **CP<sub>6+2</sub>**. They are shorter than in **RuDTolP(CO)Py** [2.200(4) Å], thus showing a stronger binding due to the influence of the electron-rich molybdenum cluster complex, which bears an overall negative charge. The deviation of the Ru atoms from the N<sub>4</sub> porphyrin plane is 0.093(4)–0.101(5) Å for **CP<sub>6</sub>** and 0.072(5)–0.102(5) Å for **CP<sub>6+2</sub>**. Due to the filled sixth coordination position, the ruthenium center deviates from porphyrin plane to a lesser extent than five-coordinated zinc in a similar structure<sup>1</sup> where the deviation reaches 0.321(8) Å. The porphyrin macrocycles are almost flat, and root mean square deviation (RMSD) from the mean plane of the 24-atom core of the porphyrin (N<sub>4</sub>C<sub>20</sub>) does not exceed 0.089 Å for **CP<sub>6</sub>** and 0.105 Å for **CP<sub>6+2</sub>**.

**Table S15.** Selected bond distances (Å) and angles (°) of ruthenium(II) porphyrin in the crystal structures **CP<sub>6</sub>** and **CP<sub>6+2</sub>**.

|                                                | <b>CP<sub>6</sub></b> |                                                | <b>CP<sub>6+2</sub></b>                   |
|------------------------------------------------|-----------------------|------------------------------------------------|-------------------------------------------|
| average Ru–N(Por)                              | 2.048, 2.056          | average Ru–N(Por)                              | 2.048, 2.057, 2.048                       |
| Ru1–N3                                         | 2.054(9)              | Ru11–N12                                       | 2.054(9)                                  |
| Ru1–N4                                         | 2.044(8)              | Ru11–N13                                       | 2.046(7)                                  |
| Ru1–N5                                         | 2.061(7)              | Ru11–N14                                       | 2.043(8)                                  |
| Ru1–N6                                         | 2.032(8)              | Ru11–N15                                       | 2.048(7)                                  |
| Ru2–N7                                         | 2.105(13)             | Ru21–N22                                       | 2.065(12)                                 |
| Ru2–N8                                         | 2.007(14)             | Ru21–N23                                       | 2.049(8)                                  |
| –                                              | –                     | Ru21–N24                                       | 2.029(10)                                 |
| –                                              | –                     | Ru21–N25                                       | 2.086(10)                                 |
| –                                              | –                     | Ru31–N32                                       | 2.046(11)                                 |
| –                                              | –                     | Ru31–N33                                       | 2.058(9)                                  |
| –                                              | –                     | Ru31–N34                                       | 2.030(10)                                 |
| –                                              | –                     | Ru31–N35                                       | 2.059(10)                                 |
| Ru–N(Py)                                       | 2.168(8), 2.166(10)   | Ru–N(Py)                                       | 2.192(7), 2.162(10),<br>2.159(8)          |
| Ru–C(CO)                                       | 1.810(14), 1.829(14)  | Ru–C(CO)                                       | 1.827(11), 1.845(13),<br>1.829(12)        |
| C(CO)–O(CO)                                    | 1.172(13), 1.170(14)  | C(CO)–O(CO)                                    | 1.168(13), 1.140(14),<br>1.153(13)        |
| Ru deviation from N <sub>4</sub> plane         | 0.093(4), 0.101(5)    | Ru deviation from N <sub>4</sub> plane         | 0.072(5), 0.084(7),<br>0.091(7), 0.102(5) |
| RMSD from N <sub>4</sub> C <sub>20</sub> plane | 0.053, 0.089          | RMSD from N <sub>4</sub> C <sub>20</sub> plane | 0.042, 0.077, 0.105,<br>0.091             |

**Table S16.** Selected dihedral and torsion angles ( $^{\circ}$ ) which describe the degrees of freedom in the supramolecular structures  $\text{CP}_n$ .<sup>a</sup>

|                                                                             | $\text{CP}_6$ with RuDTolP(CO) | $\text{CP}_{6+2}$ with RuDTolP(CO) | $\text{CP}_{6+2}$ with ZnDTolP     | $\text{CP}_2$ with ZnDTolP | PyMoC                          |
|-----------------------------------------------------------------------------|--------------------------------|------------------------------------|------------------------------------|----------------------------|--------------------------------|
| $(\text{Mo}_3)_p\text{-(Py)}_p$                                             | 35.8(3),<br>44.82(3)           | 36.7(3),<br>32.6(4),<br>25.8(3)    | 7.8(3),<br>19.7(4),<br>14.5(4)     | 10.3(10)                   | 7.9(1),<br>10.3(1),<br>46.5(2) |
| $(\text{DTolP})_p\text{-(Ru/Zn-N(Py))}_v$                                   | 89.3(3),<br>89.9(4)            | 89.0(3),<br>89.7(4),<br>88.4(4)    | 89.1(5),<br>86.5(5),<br>87.2(5)    | 82.1(1)                    | –                              |
| $(\text{DTolP})_p\text{-(Py)}_p$                                            | 83.7(3),<br>90.0(7)            | 89.9(3),<br>88.8(4),<br>89.2(4)    | 86.6(4),<br>86.9(4),<br>86.3(5)    | 69.4(1)                    | –                              |
| $\text{C}_{\text{Py}}\text{-N}_{\text{Py}}\text{-Zn/Ru-C}_{\text{mesoTol}}$ | 2.0(8),<br>89.96(19)           | 84.8(9),<br>9.5(13),<br>3.4(10)    | 20.1(12),<br>15.4(12),<br>50.8(18) | 51.7(3)                    | –                              |
| Reference                                                                   | This work                      | This work                          | <sup>1</sup>                       | <sup>1</sup>               | <sup>1</sup>                   |

<sup>a</sup> p – plane; v – vector.

In both Ru  $\text{CP}_6$  and  $\text{CP}_{6+2}$  structures there are several degrees of freedom. The first one is when the pyridyl ring rotates about the cluster, it can be characterized by the dihedral angles between Py and an adjacent  $\text{Mo}_3$  plane (Fig. S39a). The second degree of freedom is the variation of the angle between Py-ligand and the porphyrin plane, which can differ from  $90^{\circ}$  (Fig. S39b)<sup>16,17</sup>. The third option is to rotate the porphyrin molecules about the pyridine moiety and change its orientation (Fig. S41). Dihedral angles that describe these degrees of freedom are summarized in Table S17.

In the crystal structure of the parent **PyMoC** cluster<sup>1</sup> the dihedral angles between the pyridyl rings and the  $\text{Mo}_3$  plane vary from  $7.9^{\circ}$  to  $46.5^{\circ}$  (Fig. S40). Such a wide variation agrees with the possibility of free rotation of the pyridine fragment. When zinc porphyrins are sitting on the pyridine nitrogen, the rotation is less free due to induced steric hindrance. Accordingly, in the zinc hybrid systems the same angle varies from  $7.8^{\circ}$  to  $19.7^{\circ}$  (Table S17)<sup>1</sup>. Surprisingly, the rotation angle for ruthenium hybrid systems varies less but the angles are systematically larger and span the range  $25.8^{\circ}$ – $44.82^{\circ}$  for both crystal structures,  $\text{CP}_6$  and  $\text{CP}_{6+2}$ .

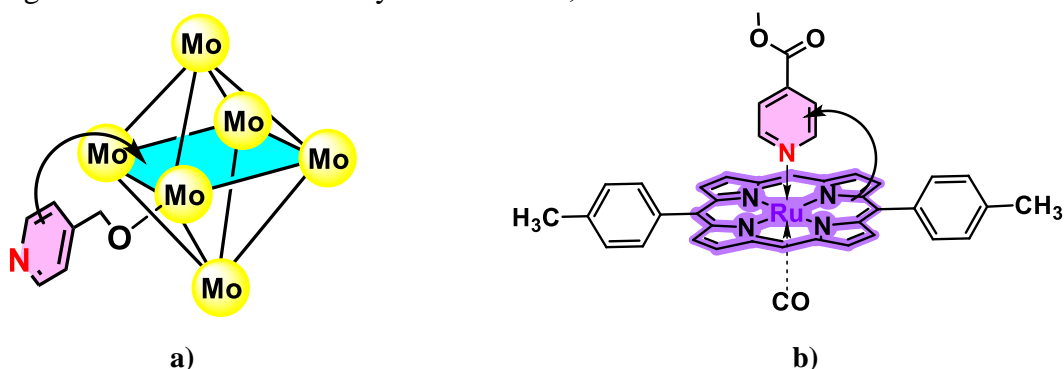

**Fig. S39** Schematic illustration of dihedral angles between Py and  $\text{Mo}_3$  plane (a), between Py-ligand and Ru(II) porphyrin plane (b).

As for the angle between Py-ligand and porphyrins, the Ru–N(Py) bonds are essentially perpendicular to  $\text{N}_4$  planes of corresponding porphyrins, and the dihedral angles between the pyridyl rings and  $\text{N}_4$  planes are close to  $90^{\circ}$  (Table S17). Similar values were observed in the Zn

$\text{CP}_{6+2}$  structure<sup>1</sup>, while in the Zn  $\text{CP}_2$  structure the pyridyl ring is tipped from the perpendicular position [the Ru–N(Py) bond is tilted by 7.9° from the perpendicular to N<sub>4</sub> plane, and the dihedral angle between the pyridyl ring and N<sub>4</sub> plane is 69.4°].

To compare the relative orientation of the tolyl substituted porphyrin and pyridine fragment we choose the torsion angle  $\text{C}_{\text{Py}}\text{--N}_{\text{Py}}\text{--Zn/Ru--C}_{\text{mesoTol}}$  which is highlighted orange in Fig. S38 (Table S17). While the torsion angle is equal to 2.0 and 90.0° for ruthenium  $\text{CP}_6$  and 3.4, 9.5 and 84.8° for  $\text{CP}_{6+2}$ , for the zinc analogue it is equal to 15.4, 20.1 and 50.8°. These values show the differences between zinc and ruthenium  $\text{CP}_{6+2}$  complexes. The different orientation of the pyridyl plane relative to the cluster in Zn and Ru structures leads to a different twist of A<sub>2</sub>-porphyrin for a more compact porphyrin arrangement around the cluster core.

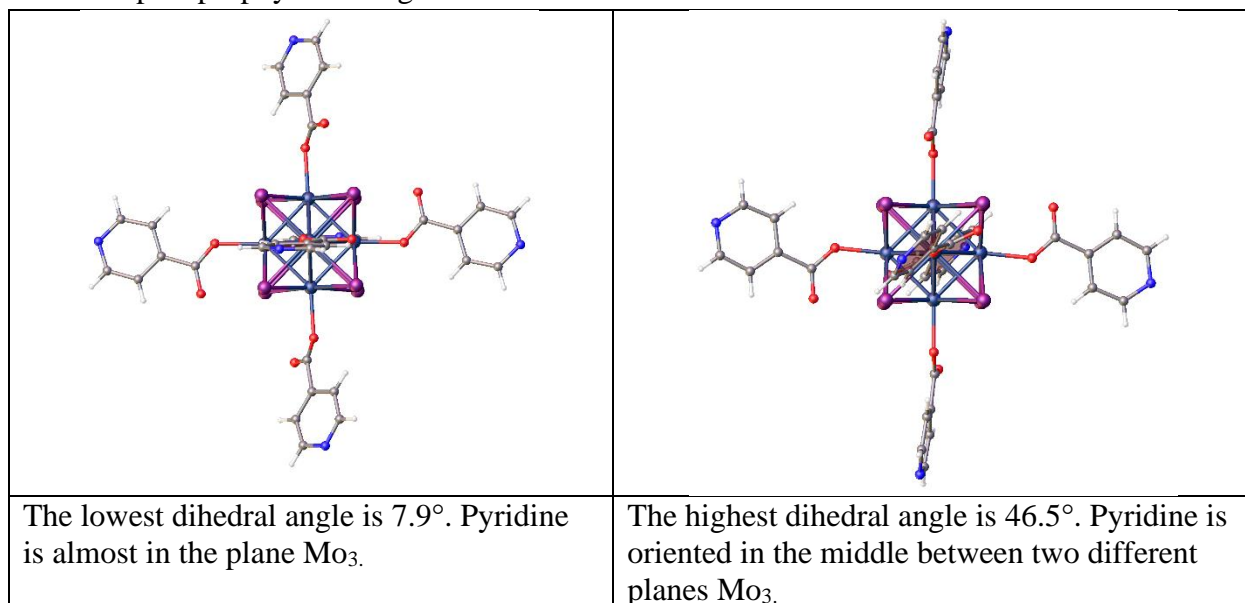

**Fig. S40** The dihedral angles  $(\text{Mo}_3)_p\text{--}(\text{Py})_p$  between the pyridyl rings and the Mo<sub>3</sub> plane in the crystal structure of the parent  $\text{PyMoC}$  cluster<sup>1</sup>.

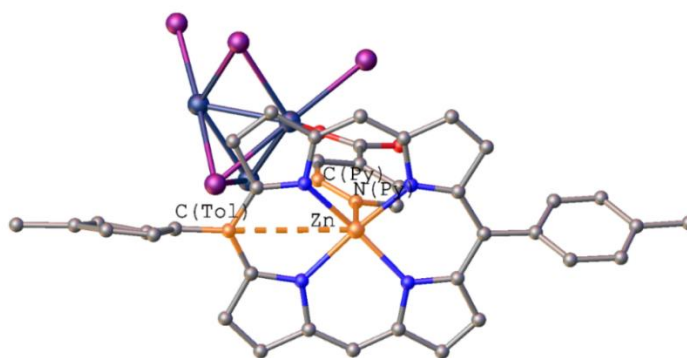

**Fig. S41** The torsion angle  $\text{C}_{\text{Py}}\text{--N}_{\text{Py}}\text{--Zn/Ru--C}_{\text{mesoTol}}$ , which describes the porphyrin molecules rotate about pyridine moiety, is shown in orange.

**Table S17.** Short contacts in crystal structures  $\text{CP}_{6+2}$  and  $\text{CP}_6$  (Å) forming the packing.

| Atoms D–H···A                | D–H distance, Å | H···A distance, Å | D···A distance, Å | D–H–A angle, ° | Type of interaction                              |
|------------------------------|-----------------|-------------------|-------------------|----------------|--------------------------------------------------|
| <b>CP<sub>6+2</sub></b>      |                 |                   |                   |                |                                                  |
| <b>Inside hybrid complex</b> |                 |                   |                   |                |                                                  |
| O41–H41A···O32               | 0.900(6)        | 1.797(6)          | 2.657(9)          | 159.8          | H <sub>2</sub> O(coordinated to Ru41)···O(PyCOO) |
| O41–H41B···O12 <sup>1</sup>  | 0.900(6)        | 2.133(11)         | 2.951(14)         | 150.8          |                                                  |
| C215–H21A···O42              | 0.98            | 2.64              | 3.60(2)           | 166.3          | CH(Tol CH <sub>3</sub> )···O(CO)                 |

| Weak contacts between $\text{NBu}_4^+$ and $\text{PyCOO}^-$ |      |      |           |       |                                                                                      |
|-------------------------------------------------------------|------|------|-----------|-------|--------------------------------------------------------------------------------------|
| C71–H71A $\cdots$ O22                                       | 0.99 | 2.65 | 3.48(2)   | 141.8 | $\text{CH}_2(\text{Bu}_4\text{N})\cdots\text{O}(\text{PyCOO})$                       |
| C52–H52B $\cdots$ O22                                       | 0.99 | 2.54 | 3.34(2)   | 137.3 |                                                                                      |
| Weak contacts between acetone and pyridine                  |      |      |           |       |                                                                                      |
| C35–H35 $\cdots$ O15                                        | 0.95 | 2.55 | 3.43(2)   | 154.7 | $\text{CH}(\text{Py})\cdots\text{O}(\text{acetone})$                                 |
| C4–D4A $\cdots$ C12                                         | 0.98 | 2.85 | 3.65(3)   | 138.4 | $\text{CH}(\text{Me acetone})\cdots\pi(\text{Py})$                                   |
| Between adjacent hybrid complexes                           |      |      |           |       |                                                                                      |
| Short contacts formed by CO ligand with adjacent molecules  |      |      |           |       |                                                                                      |
| C203 <sup>2</sup> –H203 <sup>2</sup> $\cdots$ O13           | 0.95 | 2.69 | 3.48(2)   | 140.5 | $\text{CH}_\beta(\text{Por})\cdots\text{O}(\text{CO})$                               |
| C332 <sup>3</sup> –H33A <sup>3</sup> $\cdots$ O13           | 0.98 | 2.50 | 3.16(2)   | 124.4 | $\text{CH}(\text{Tol CH}_3)\cdots\text{O}(\text{CO})$                                |
| C116 <sup>4</sup> –H116 <sup>4</sup> $\cdots$ O33           | 0.95 | 2.63 | 3.57(1)   | 172.0 | $\text{CH}(\text{Ph Tol})\cdots\text{O}(\text{CO})$                                  |
| CP <sub>6</sub>                                             |      |      |           |       |                                                                                      |
| Weak contacts forming sql 2D layers in <i>ab</i> plane      |      |      |           |       |                                                                                      |
| C20 <sup>5</sup> –H20 <sup>5</sup> $\cdots$ O4              | 0.95 | 2.34 | 3.26(2)   | 162.0 | $\text{C–H}(\text{Tol})\cdots\text{O}(\text{COO})$                                   |
| C57 <sup>6</sup> –H57A <sup>6</sup> $\cdots$ C1             | 0.98 | 2.64 | 3.62(2)   | 174.1 | $\text{CH}(\text{Tol CH}_3)\cdots\text{C}(\text{COO})$                               |
| C55 <sup>6</sup> –H55 <sup>6</sup> $\cdots$ C2              | 0.95 | 2.69 | 3.61(2)   | 162.5 | $\text{C–H}(\text{Tol})\cdots\pi$ contacts between tolyl and pyridyl                 |
| C55 <sup>6</sup> –H55 <sup>6</sup> $\cdots$ C6              | 0.95 | 2.84 | 3.75(2)   | 162.1 |                                                                                      |
| Contacts between layers                                     |      |      |           |       |                                                                                      |
| C43 $\cdots$ C45 <sup>7</sup>                               | –    | –    | 3.274(14) | –     | $\pi\cdots\pi$ stacking between pyrrole rings of Ru1 porphyrins                      |
| C43 $\cdots$ C44 <sup>7</sup>                               | –    | –    | 3.390(18) | –     |                                                                                      |
| C44 $\cdots$ C45 <sup>7</sup>                               | –    | –    | 3.444(16) | –     |                                                                                      |
| C47 $\cdots$ C47 <sup>8</sup>                               | –    | –    | 3.52(3)   | –     | C $\cdots$ C contacts between <i>meso</i> and $\beta$ carbon atoms of Ru2 porphyrins |
| C49 $\cdots$ C49 <sup>8</sup>                               | –    | –    | 3.54(3)   | –     |                                                                                      |

<sup>1</sup>1-x,1-y,1-z; <sup>2</sup>+x,-1+y,+z; <sup>3</sup>-1+x,-1+y,-1+z; <sup>4</sup>1-x,-y,1-z; <sup>5</sup>-1/2+x,-1/2+y,+z; <sup>6</sup>1/2-x, 3/2-y, 1-z; <sup>7</sup>3/2-x,3/2-y,2-z; <sup>8</sup>-x,1-y,1-z.

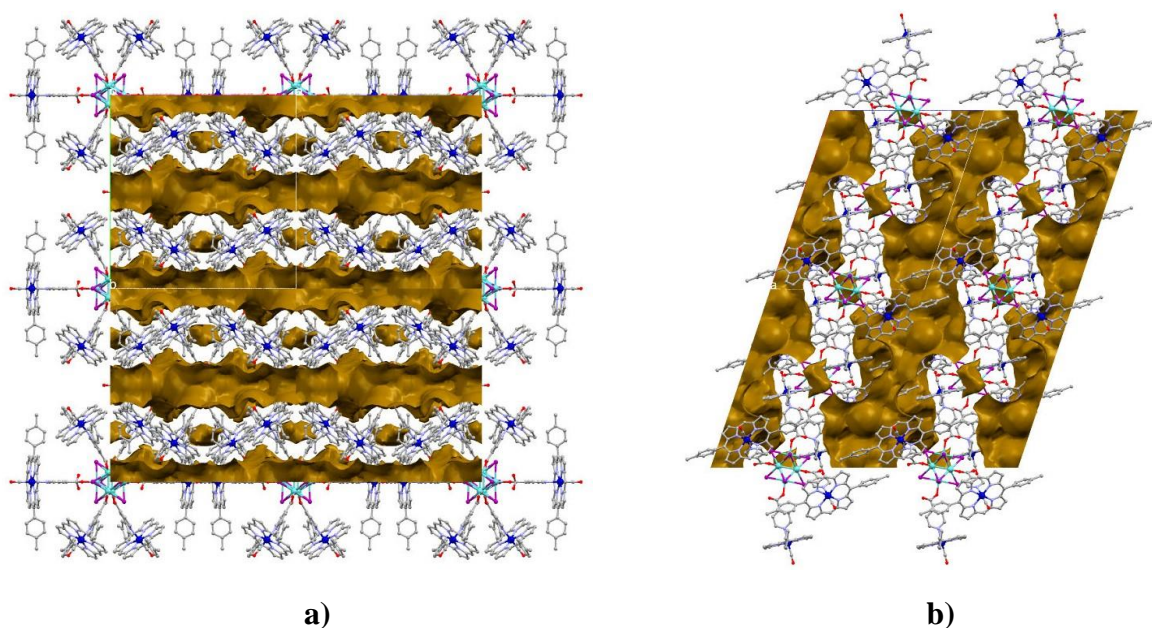

**Fig. S42** The visualization of open channels in  $\text{CP}_6$  crystal structure, view along *c* direction (a) and *b* direction (b). The picture was made using Mercury software.

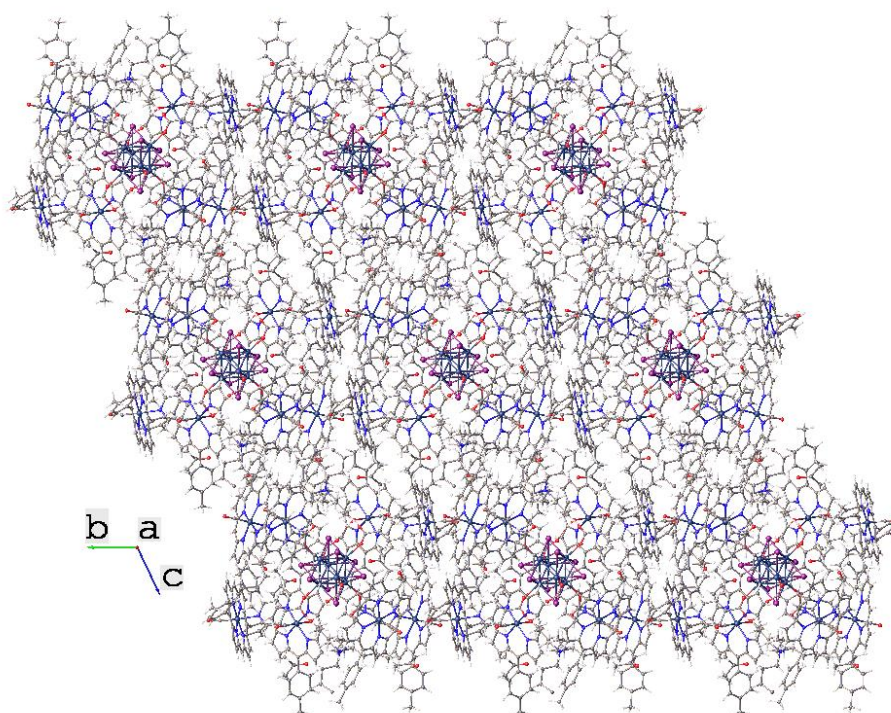

**Fig. S43** The crystal packing of  $\text{CP}_{6+2}$ , view along  $a$  direction.

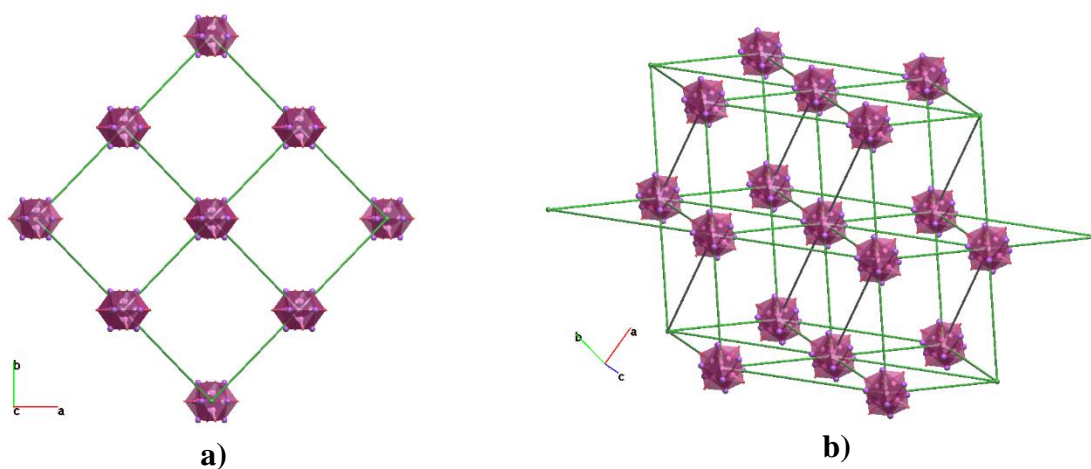

**Fig. S44** The packing of  $\text{CP}_6$  structure, simplified using ToposPro,<sup>13</sup> the porphyrins are omitted for clarity and only cluster cores of hybrid spheres are shown. The closest contacts between adjacent spheres are in  $ab$  plane, which form the layers with **sql** topology <http://rcsr.anu.edu.au/layers/sql> (a). The layers are placed one above another in the motive AAA along  $c$  axes. If the van der Waals contacts between layers are taken into account, the structure can be regarded as uninodal ten-connected 3D supramolecular framework with **bct** topology <http://rcsr.anu.edu.au/nets/bct> (b).

## 2.6. Photophysical properties

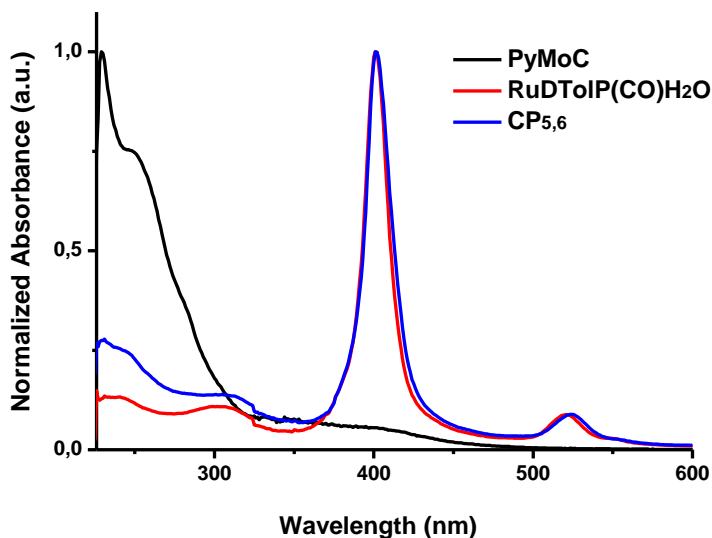

**Fig. S45** UV-Vis spectrum of **PyMoC**, **RuDTolP(CO)H<sub>2</sub>O** and hybrid complexes **CP<sub>5,6</sub>** in CH<sub>2</sub>Cl<sub>2</sub>.

1. Volostnykh, M. V.; Mikhaylov, M.A.; Sinelshchikova, A.A.; Kirakosyan, G.A.; Martynov, A.G.; Grigoriev, M.S.; Piryazev, D.A.; Tsivadze, A.Y.; Sokolov, M.N.; Gorbunova, Y.G. *Dalt. Trans.* 2019, **48**, 1835–1842.
2. Iwamoto, H.; Hori, K.; Fukazawa, Y. A. *Tetrahedron Lett.* 2005, **46**, 731–734.
3. Chichak, K.; Branda, N.R. *Chem. Commun.* 1999, 523–524.
4. Fabrizi de Biani, F.; Grigiotti, E.; Laschi, F.; Zanello, P.; Juris, A.; Prodi, L.; Chichak, K.S.; Branda, N.R. *Inorg. Chem.* 2008, **47**, 5425–5440.
5. Chichak, K.; Branda, N.R. *Chem. Commun.* 2000, **47**, 1211–1212.
6. Oliva, A.I.; Gómez, K.; González, G.; Ballester, P. *New J. Chem.* 2008, **32**, 2159.
7. R. G. Little and J. A. Ibers, *J. Am. Chem. Soc.*, 1973, **95**, 8583–8590.
8. S. Lipstman, S. Muniappan, S. George and I. Goldberg, *CrystEngComm*, 2006, **8**, 601.
9. S. L. Darling, C. Ching Mak, N. Bampos, N. Feeder, S. J. Teat and J. K. M. Sanders, *New J. Chem.*, 1999, **23**, 359–364.
10. E. Alessio, S. Geremia, S. Mestroni, E. Iengo, I. Srnova and M. Slouf, *Inorg. Chem.*, 1999, **38**, 869–875.
11. M. O. Senge, C. J. Medforth, T. P. Forsyth, D. A. Lee, M. M. Olmstead, W. Jentzen, R. K. Pandey, J. A. Shelnutt and K. M. Smith, *Inorg. Chem.*, 1997, **36**, 1149–1163.
12. C. J. Kingsbury, K. J. Flanagan, H. Eckhardt, M. Kielmann and M. O. Senge, *Molecules*, 2020, **25**, 3195.
13. Blatov, V.A.; Shevchenko, A.P.; Proserpio, D.M. *Cryst. Growth Des.* 2014, **14**, 3576–3586.
14. Mikhailov, M.A.; Brylev, K.A.; Abramov, P.A.; Sakuda, E.; Akagi, S.; Ito, A.; Kitamura, N.; Sokolov, M.N. *Inorg. Chem.* 2016, **55**, 8437–8445.
15. H. Xu and D. K. P. Ng, *Inorg. Chem.*, 2008, **47**, 7921–7927.
16. Funatsu, K.; Kimura, A.; Imamura, T.; Ichimura, A.; Sasaki, Y. *Inorg. Chem.* 1997, **36**, 1625–1635.

17. Abdulaeva, I.A.; Birin, K.P.; Sinelshchikova, A.A.; Grigoriev, M.S.; Lyssenko, K.A.; Gorbunova, Y.G.; Tsivadze, A.Y.; Bessmertnykh-Lemeune, A. *CrystEngComm* 2019, **21**, 1488–1498.
